# Supplementary material for: Synthesis and evaluation of κ2-β-diketonate and β-ketoesterate tungsten(vi) oxo-alkoxide complexes as precursors for chemical vapor deposition of WOx thin films
Source: Royal Society of Chemistry journal article supplement (doi:10.1039/c6dt01078d), 2016-01-01
Supplement: c6dt01078d1.pdf [file c6dt01078d1.pdf]

## Electronic Supplementary Information for

### Syntheses and Evaluation of $\kappa^2$ - $\beta$ -Diketonate and $\beta$ -Ketoesterate Tungsten (VI) Oxo- Alkoxide Complexes for Chemical Vapor Deposition of $\text{WO}_x$ Thin Films

*Richard O. Bonsu,<sup>a</sup> Duane C. Bock,<sup>a</sup> Hankook Kim,<sup>b</sup> Roman Y. Korotkov,<sup>c</sup> Khalil A. Abboud,<sup>a</sup>  
Timothy J. Anderson<sup>b</sup> and Lisa McElwee-White<sup>\*,a</sup>*

<sup>a</sup>Department of Chemistry, University of Florida, Gainesville, Florida, 32611-7200 USA.

<sup>b</sup>Department of Chemical Engineering, University of Florida, Gainesville, Florida, 32611-6005  
USA

<sup>c</sup>Arkema Inc., 900 First Ave., King of Prussia, PA 19406 USA

[lmwhite@chem.ufl.edu](mailto:lmwhite@chem.ufl.edu)

## Experimental Section

**Synthesis of  $\text{WO}_2(\text{dpm})_2$  (**11a**):** Complex **11a** was obtained as a side product when reacting  $[\text{WO}(\text{OCH}_2\text{C}(\text{CH}_3)_3)_4]_2$  (**19**, 0.910 mmol, 1.00 g) and more than 8 equiv Hdpm (8.00 mmol, 1.82 mL, 1.61 g) in THF. The mixture was refluxed for a total of 48 h. The pale yellow waxy residue obtained after removal of volatiles was characterized by NMR to consist of a mixture of **11** and **11a** (Figure S26).  $^1\text{H}$  NMR of **11a** ( $\text{C}_6\text{D}_6$ , 25 °C):  $\delta$  5.93 (s, 2H, COCHCO), 1.07 (s, 18H,  $\text{C}(\text{CH}_3)_3$ ), 0.95 (s, 18H,  $\text{C}(\text{CH}_3)_3$ ).  $^{13}\text{C}\{^1\text{H}\}$  NMR of **11a** ( $\text{C}_6\text{D}_6$ , 25 °C):  $\delta$  205.43 (OC), 194.52 (OC), 95.43 (COCHCO), 41.50 ( $\text{C}(\text{CH}_3)_3$ ), 40.31 ( $\text{C}(\text{CH}_3)_3$ ), 27.52 ( $(\text{CH}_3)_3\text{C}$ ), 27.07 ( $(\text{CH}_3)_3\text{C}$ ). A single crystal selected for X-ray crystallographic study from a sample crystallized in toluene was representative of **11a** (Figure S28). Crystal data and structure refinement for **11a** are shown in Table S3.

**Crystallographic Structure Determination of 11a.** X-ray intensity data for **11a** were collected at 100 K on a Bruker **DUO** diffractometer using MoK $\alpha$  radiation ( $\lambda = 0.71073 \text{ \AA}$ ) and an APEXII CCD area detector. Raw data frames were read by the program SAINT<sup>1</sup> and integrated using 3D profiling algorithms. The resulting data were reduced to produce hkl reflections and their intensities and estimated standard deviations. The data were corrected for Lorentz and polarization effects and numerical absorption corrections were applied based on indexed and measured faces. The structure was solved and refined in SHELXTL2013,<sup>1</sup> using full-matrix least-squares refinement. The non-H atoms were refined with anisotropic thermal parameters and all of the H atoms were calculated in idealized positions and refined riding on their parent atoms. The asymmetric unit consists of two chemically equivalent but crystallographically independent molecules, and a half pentane solvent molecule (located on an inversion symmetry element). Each molecule has the C19 t-butyl groups disordered and refined in two parts. Check for higher symmetry or a smaller unit cell did not provide any viable options, thus the use of the current space group and unit cell. In the final cycle of refinement, 11486 reflections (of which 8128 are observed with  $I > 2\sigma(I)$ ) were used to refine 569 parameters and the resulting  $R_1$ ,  $wR_2$  and S (goodness of fit) were 3.27%, 7.05% and 0.946, respectively. The refinement was carried out by minimizing the  $wR_2$  function using  $F^2$  rather than F values.  $R_1$  is calculated to provide a reference to the conventional R value but its function is not minimized.

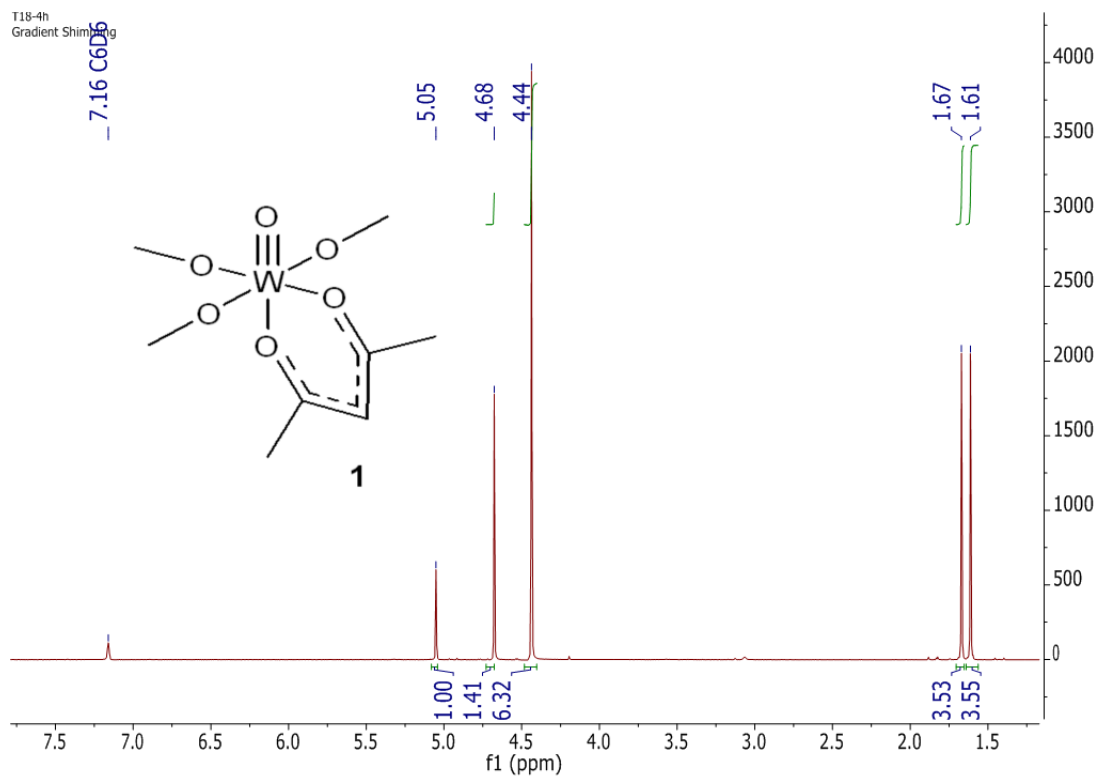

Figure S1: Room temperature  $^1\text{H}$  NMR of **1** in  $\text{C}_6\text{D}_6$ .

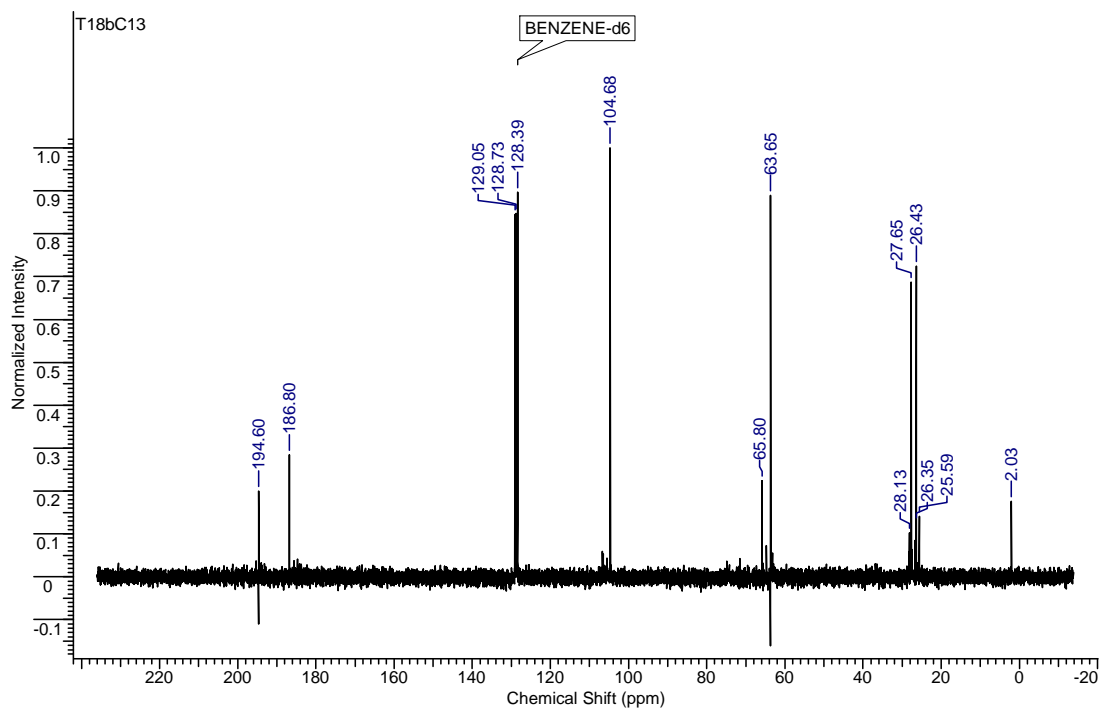

Figure S2: Room temperature  $^{13}\text{C}$  NMR of **1** in  $\text{C}_6\text{D}_6$ .

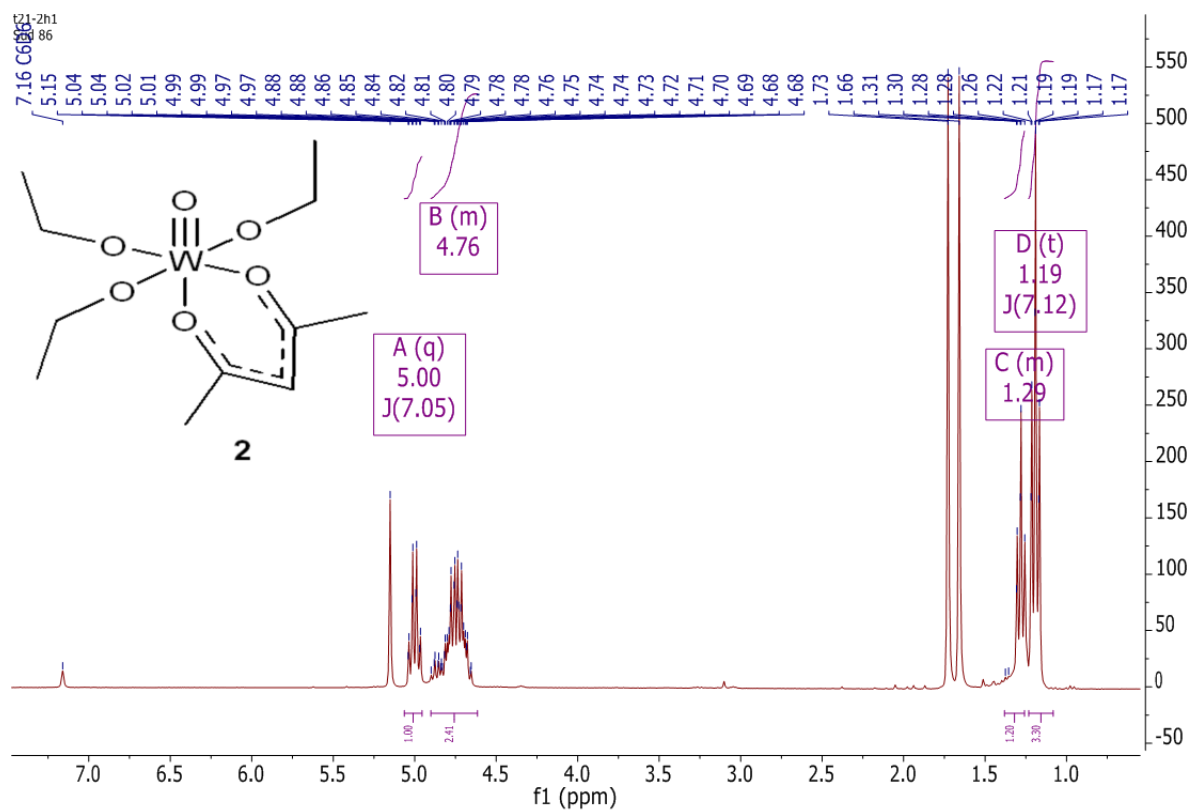

Figure S3: Room temperature  $^1\text{H}$  NMR of **2** in  $\text{C}_6\text{D}_6$ .

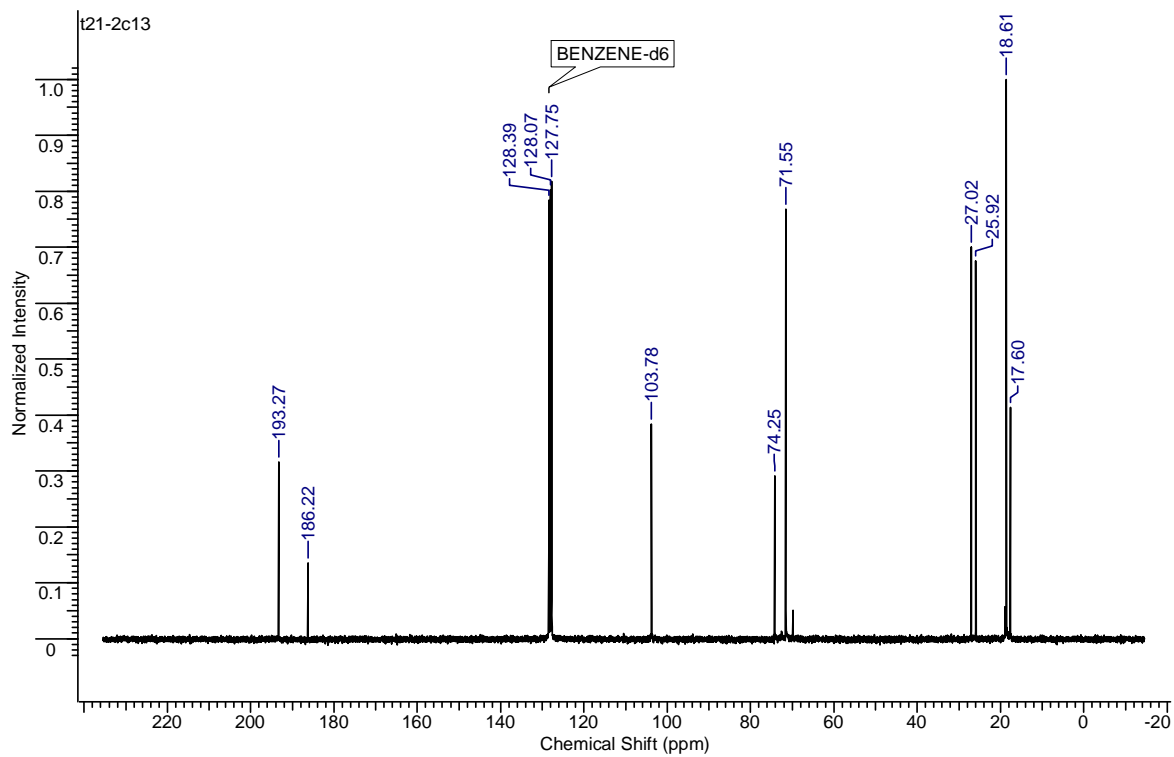

Figure S4: Room temperature  $^{13}\text{C}$  NMR of **2** in  $\text{C}_6\text{D}_6$ .

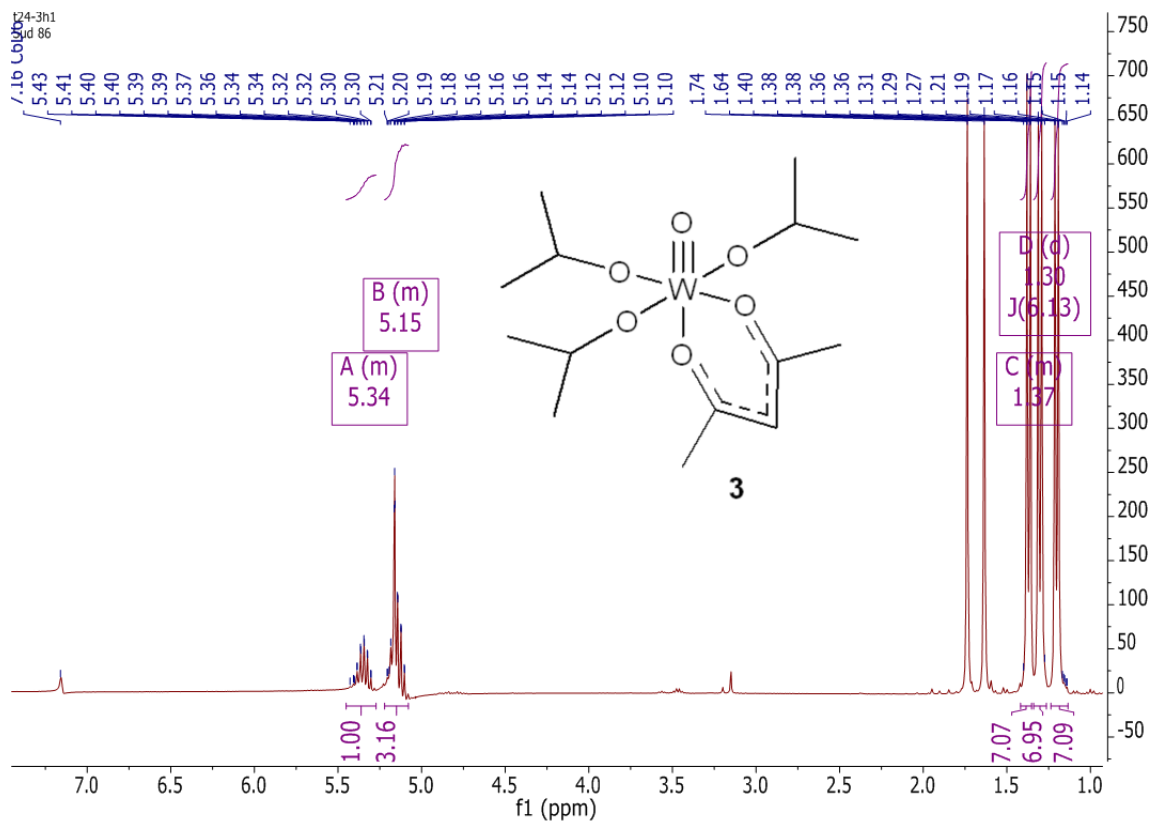

Figure S5: Room temperature  $^1\text{H}$  NMR of **3** in  $\text{C}_6\text{D}_6$ .

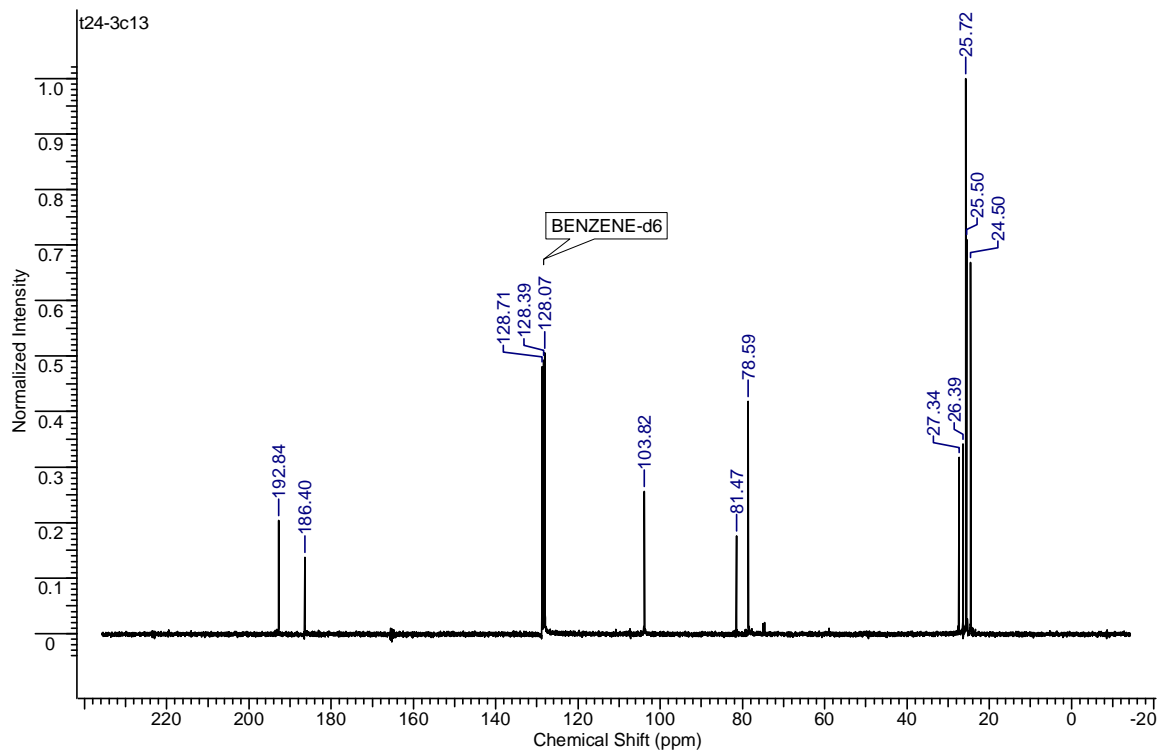

Figure S6: Room temperature  $^{13}\text{C}$  NMR of **3** in  $\text{C}_6\text{D}_6$ .

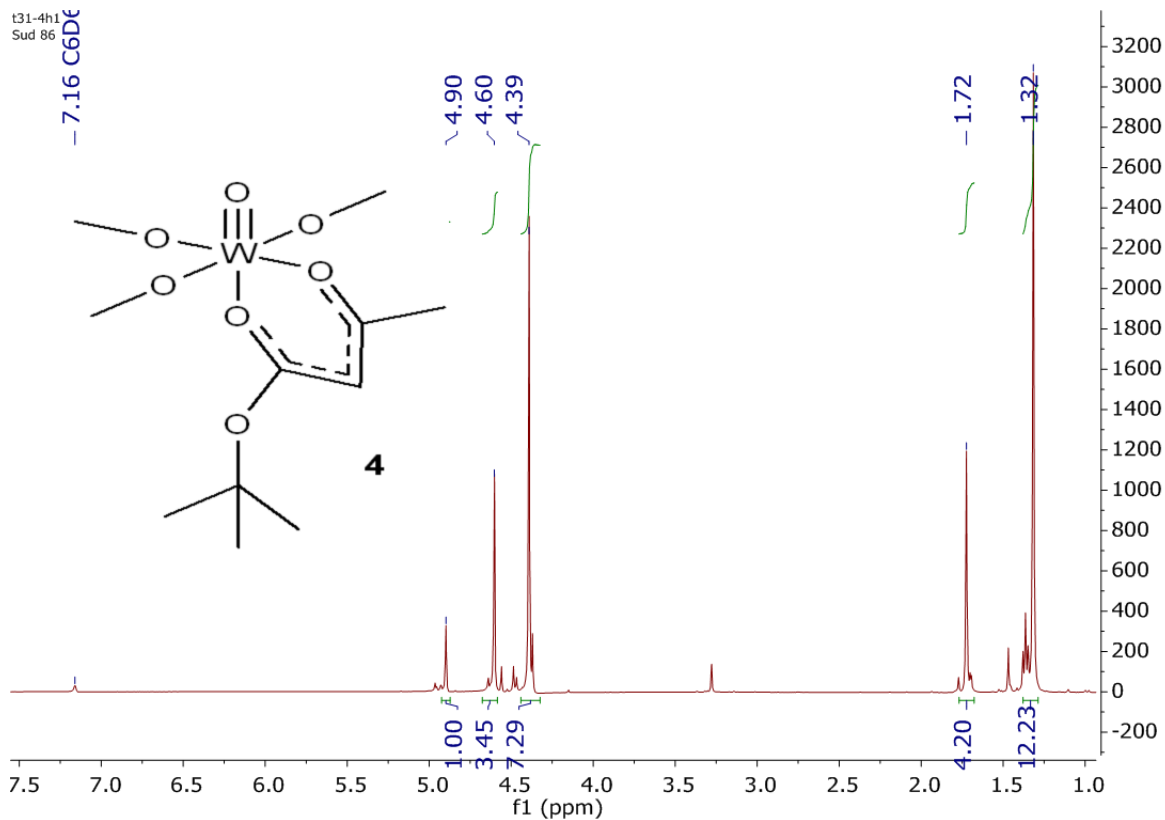

Figure S7: Room temperature  $^1\text{H}$  NMR of **4** in  $\text{C}_6\text{D}_6$ .

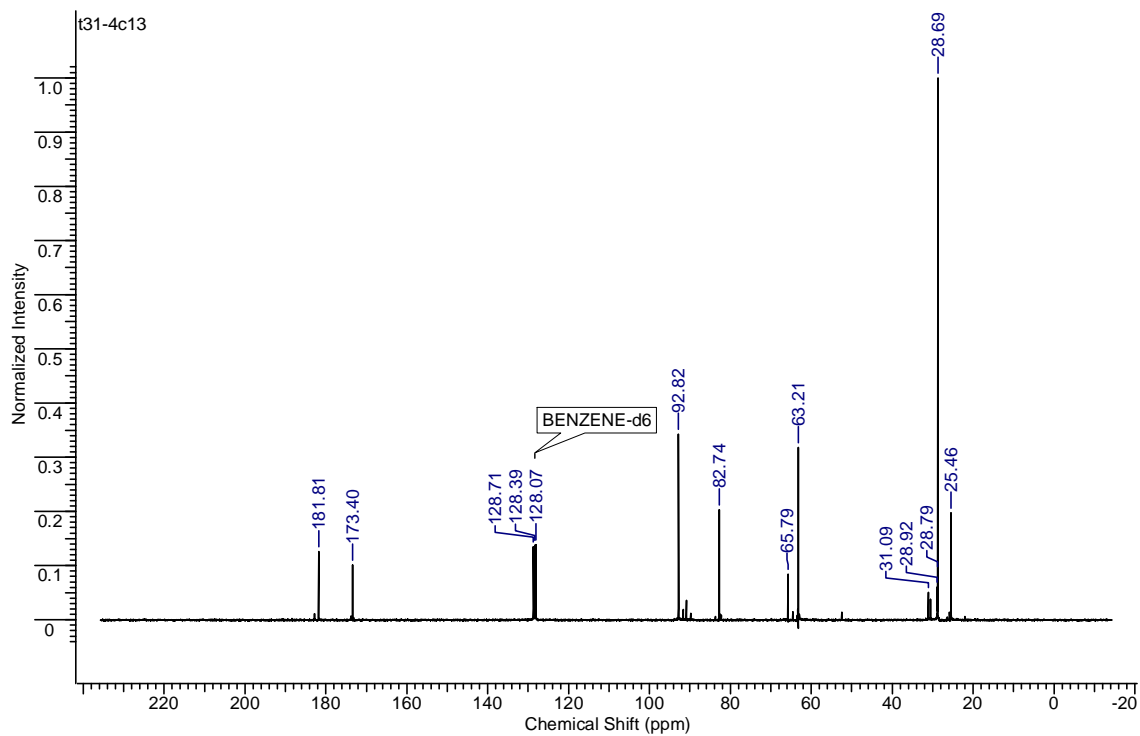

Figure S8: Room temperature  $^{13}\text{C}$  NMR of **4** in  $\text{C}_6\text{D}_6$ .

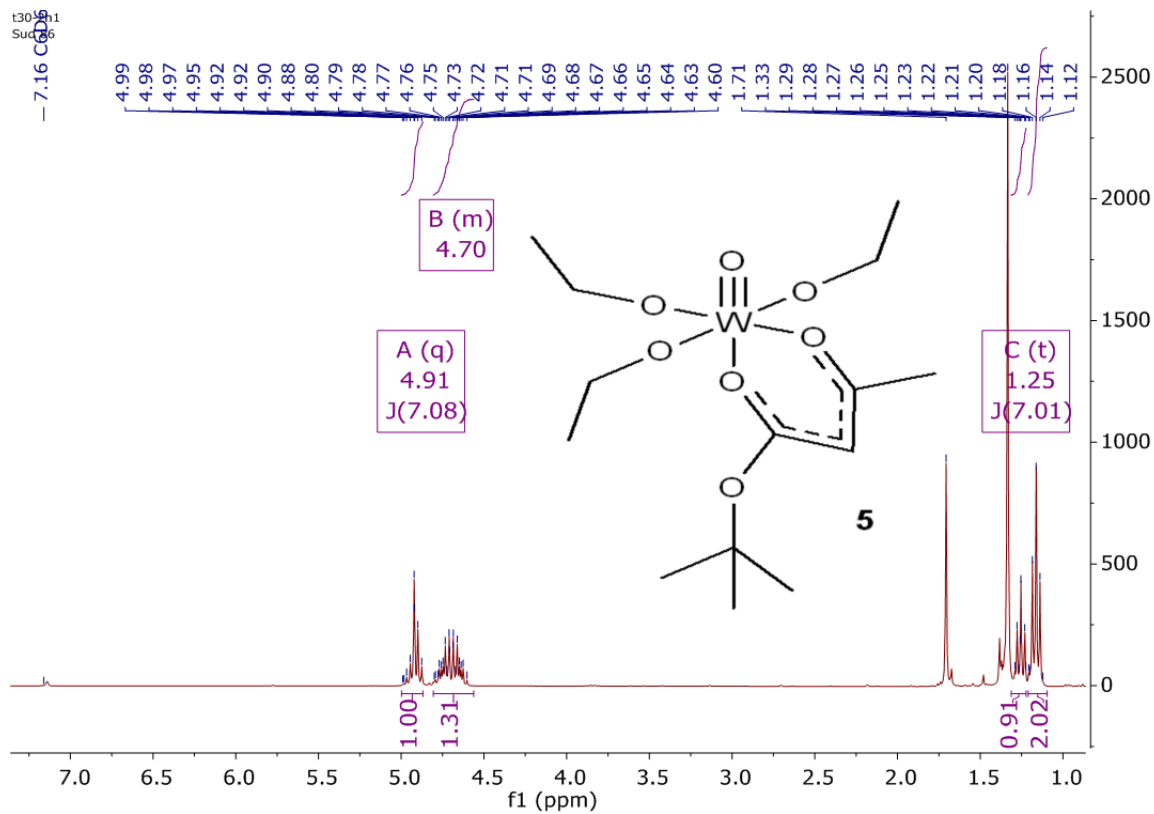

Figure S9: Room temperature  $^1\text{H}$  NMR of **5** in  $\text{C}_6\text{D}_6$ .

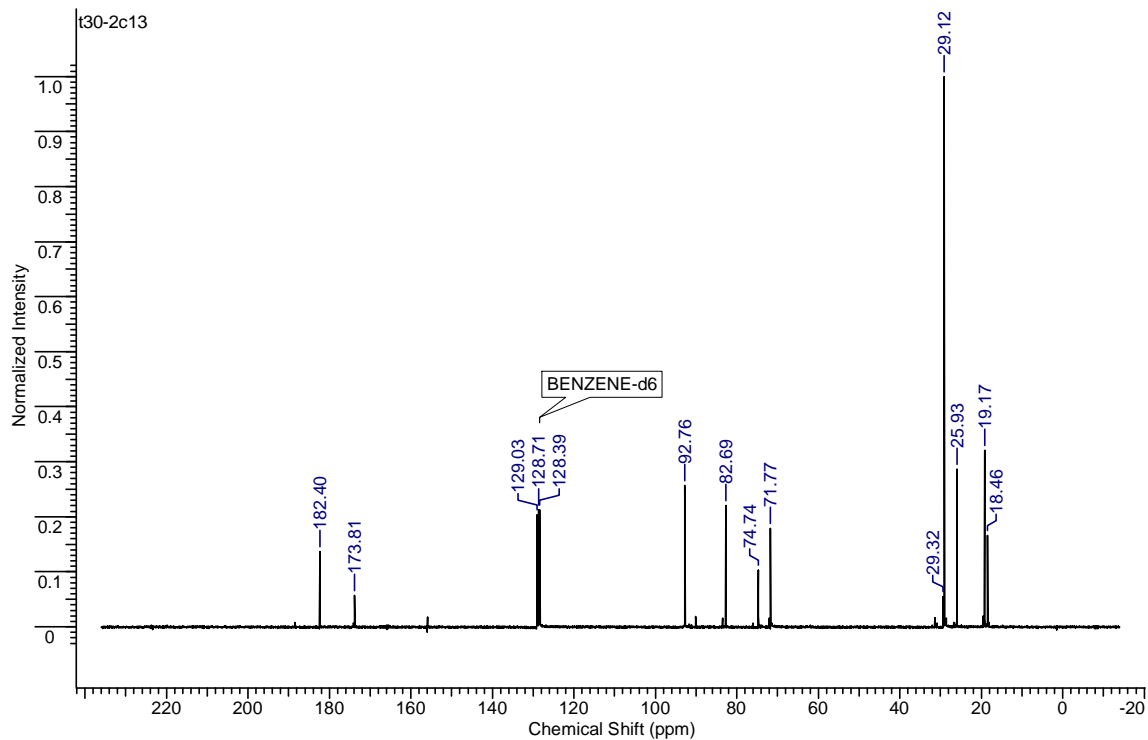

Figure S10: Room temperature  $^{13}\text{C}$  NMR of **5** in  $\text{C}_6\text{D}_6$ .

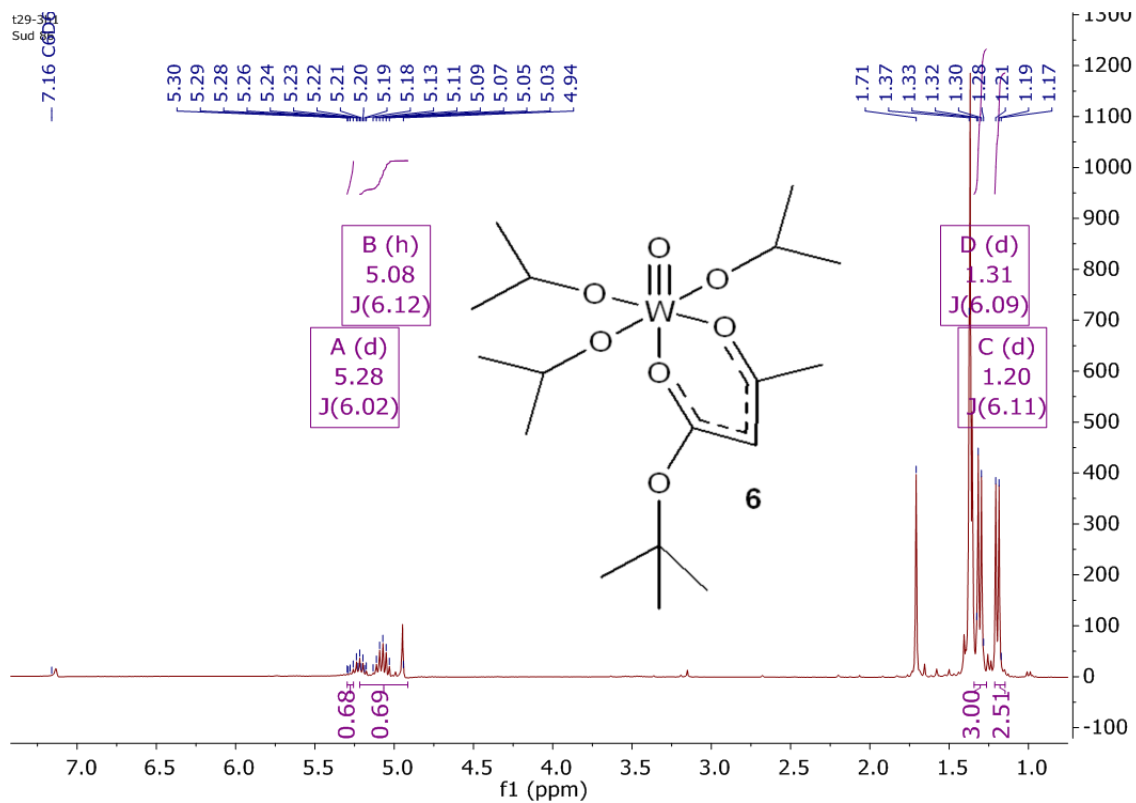

Figure S11: Room temperature  $^1\text{H}$  NMR of **6** in  $\text{C}_6\text{D}_6$ .

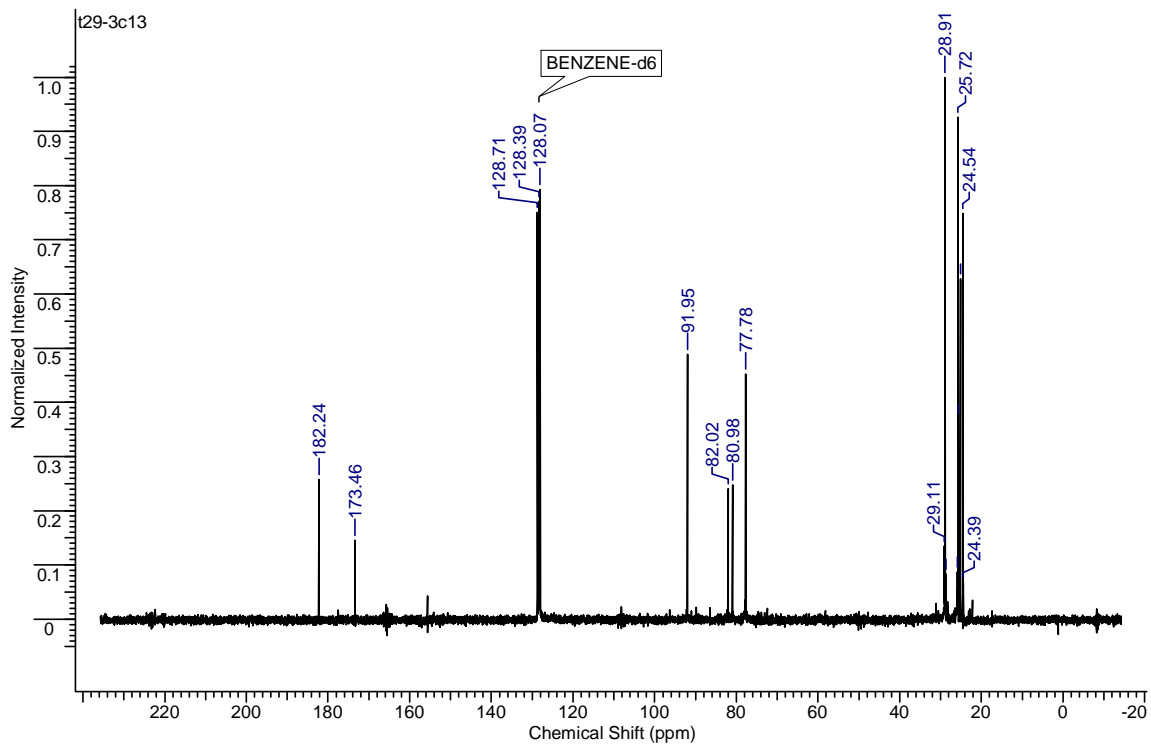

Figure S12: Room temperature  $^{13}\text{C}$  NMR of **6** in  $\text{C}_6\text{D}_6$ .



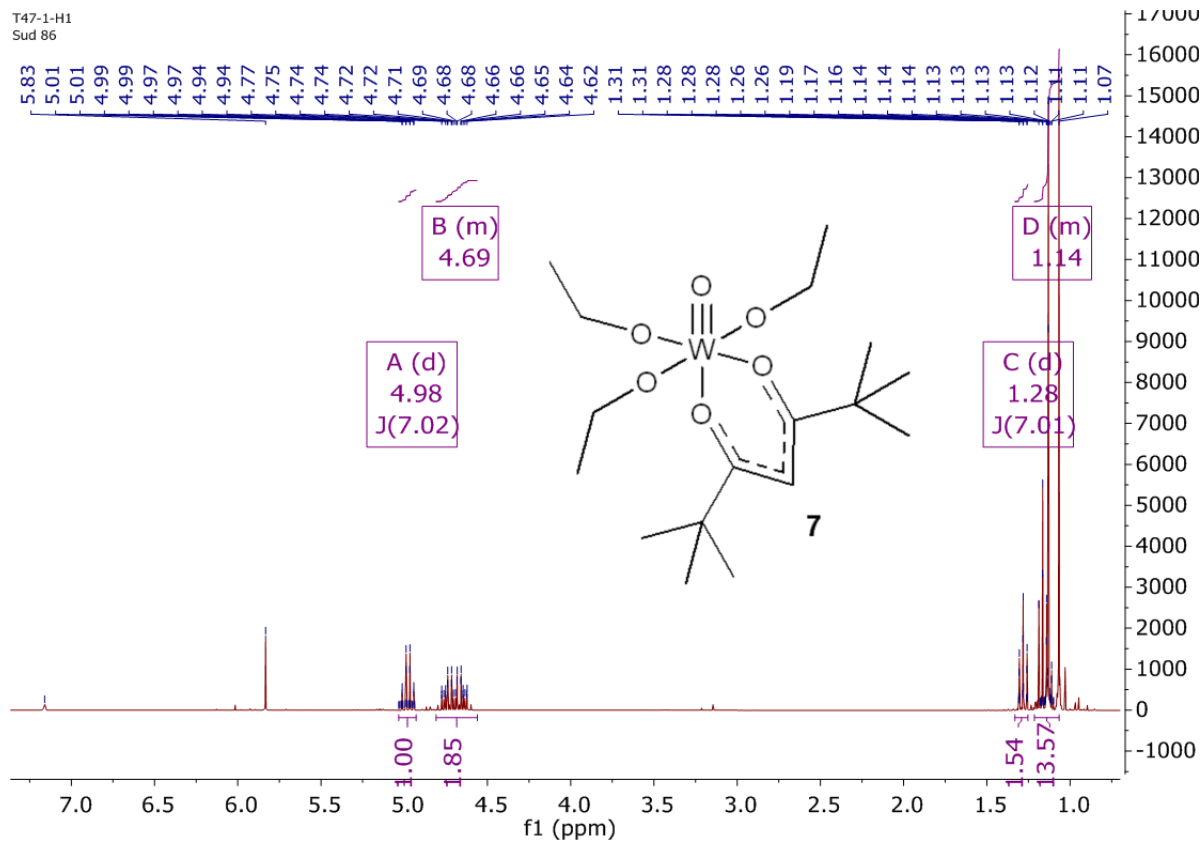

Figure S13: Room temperature  $^1\text{H}$  NMR of **7** in  $\text{C}_6\text{D}_6$ .

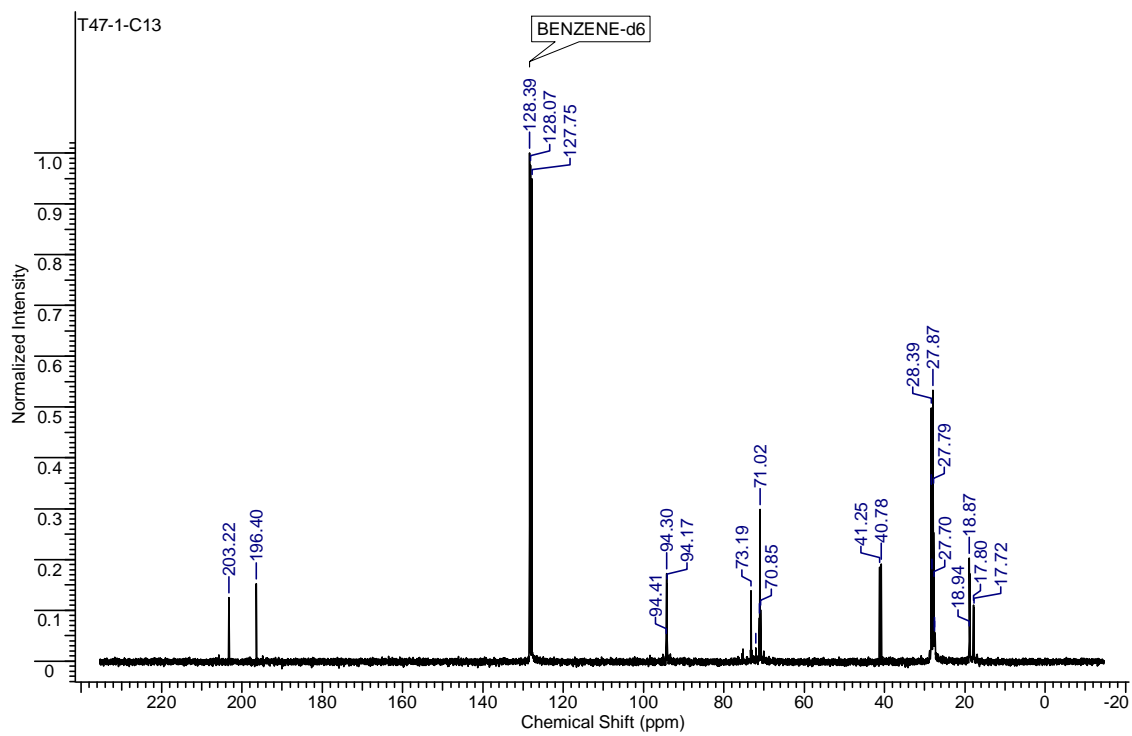

Figure S14: Room temperature  $^{13}\text{C}$  NMR of **7** in  $\text{C}_6\text{D}_6$ .

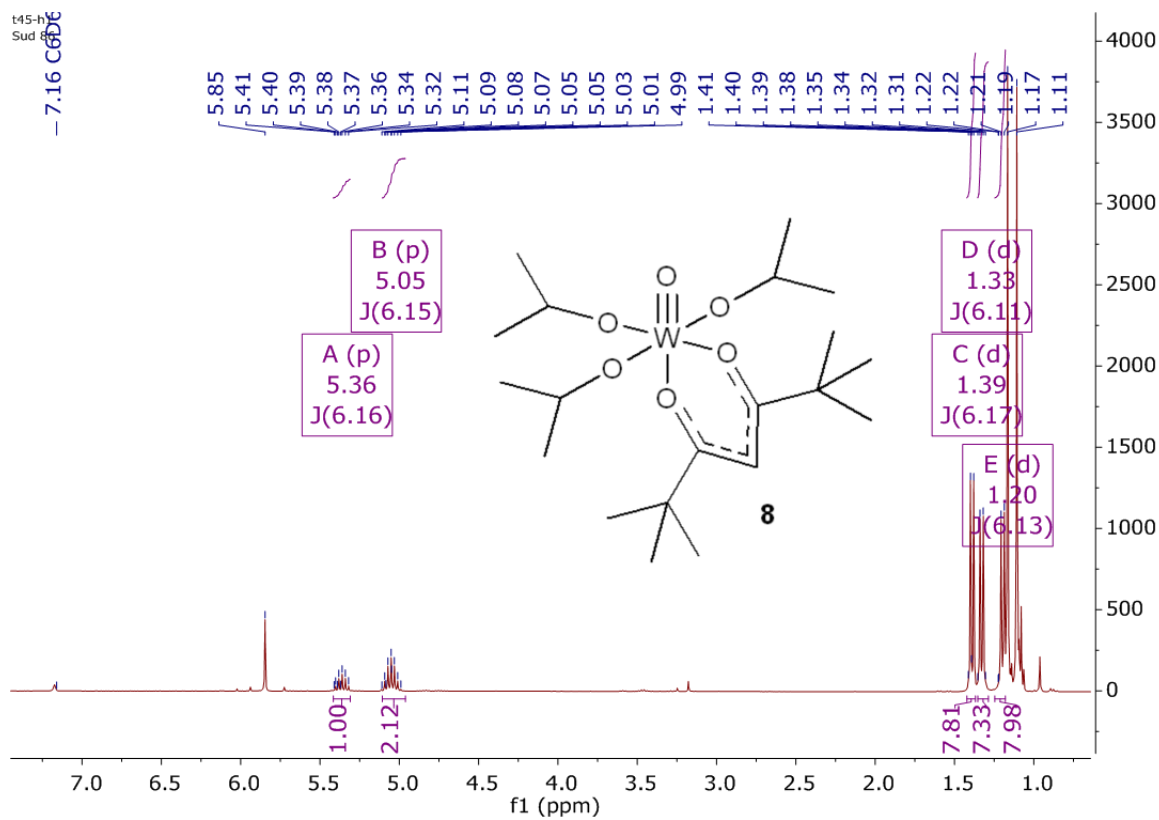

Figure S15: Room temperature  $^1\text{H}$  NMR of **8** in  $\text{C}_6\text{D}_6$ .

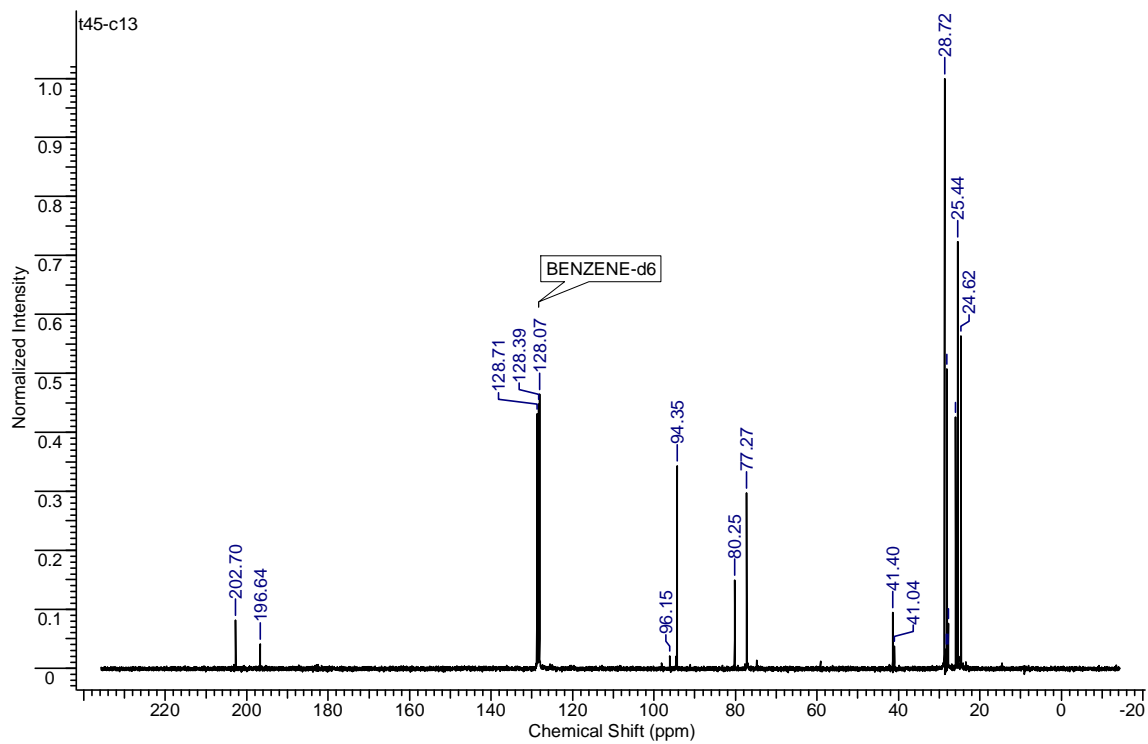

Figure S16: Room temperature  $^{13}\text{C}$  NMR of **8** in  $\text{C}_6\text{D}_6$ .

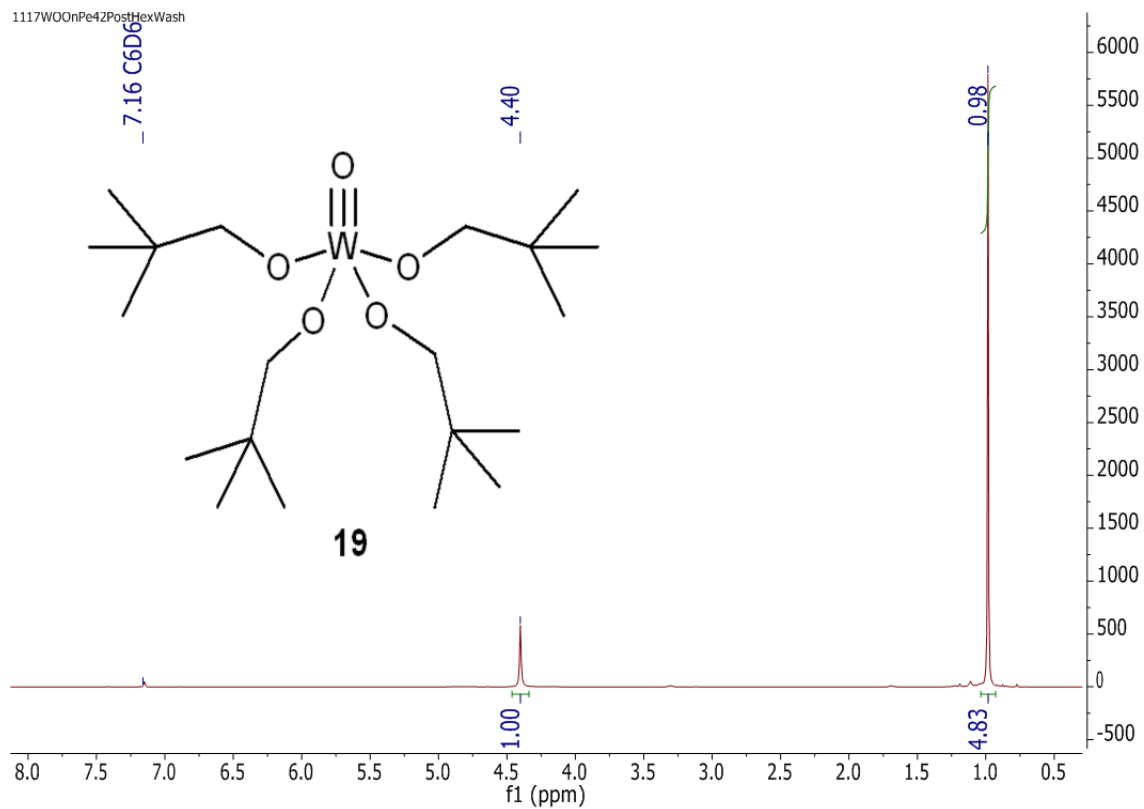

Figure S17a: Room temperature  $^1\text{H}$  NMR of **19** in  $\text{C}_6\text{D}_6$ .

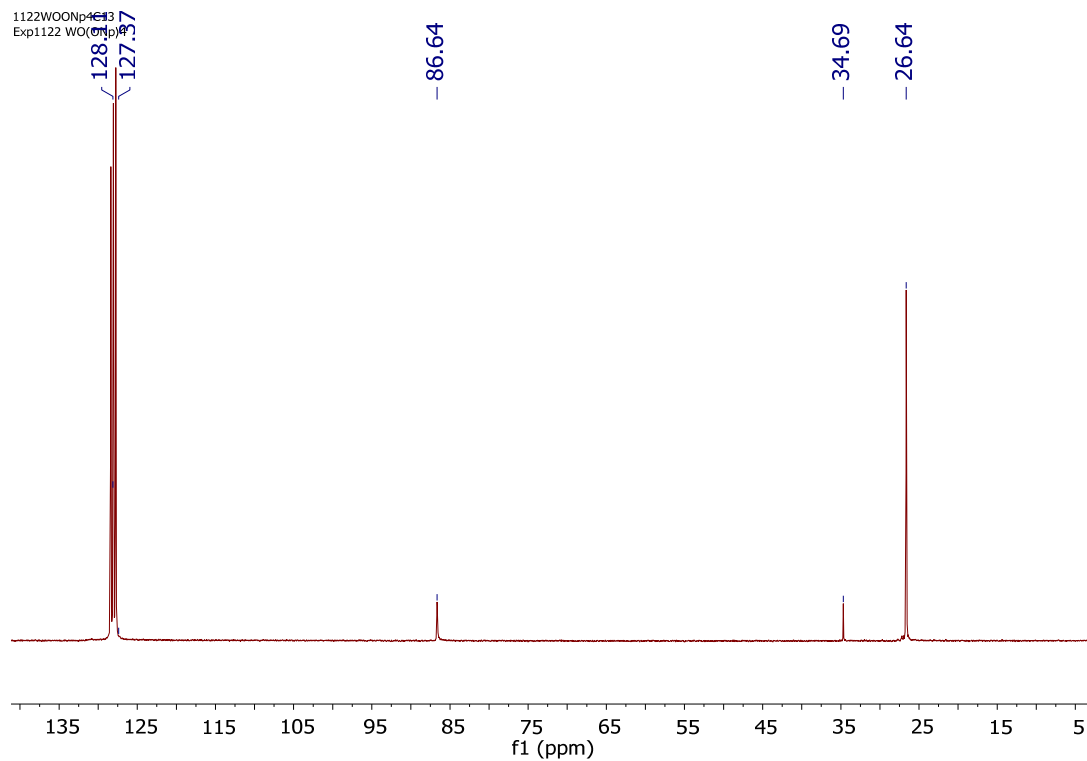

Figure S17b: Room temperature  $^{13}\text{C}$  NMR of **19** in  $\text{C}_6\text{D}_6$ .

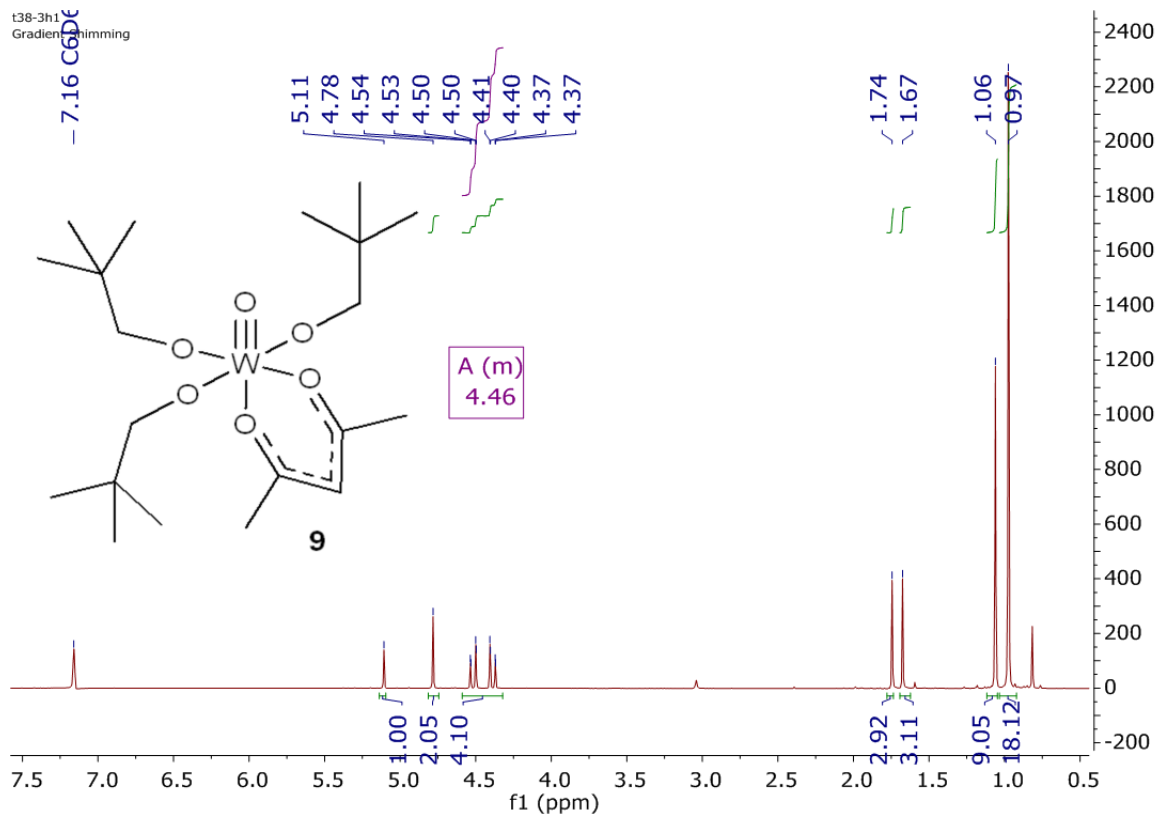

Figure S18: Room temperature  $^1\text{H}$  NMR of **9** in  $\text{C}_6\text{D}_6$ .

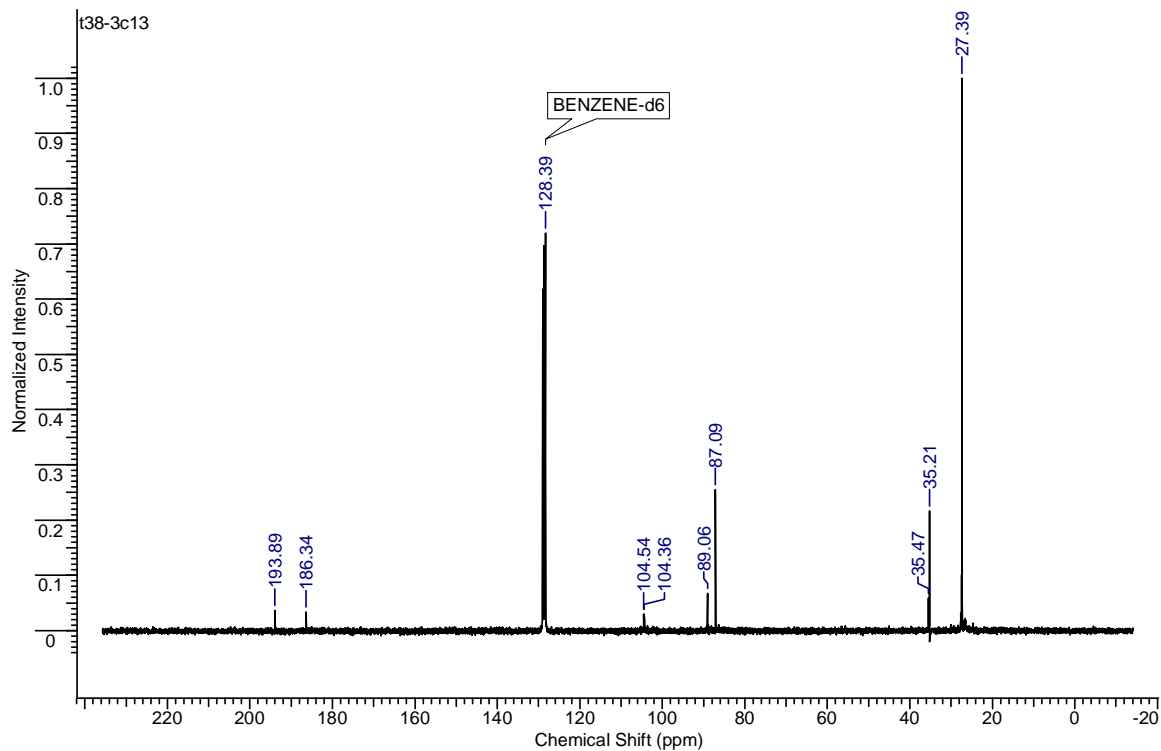

Figure S19: Room temperature  $^{13}\text{C}$  NMR of **9** in  $\text{C}_6\text{D}_6$ .

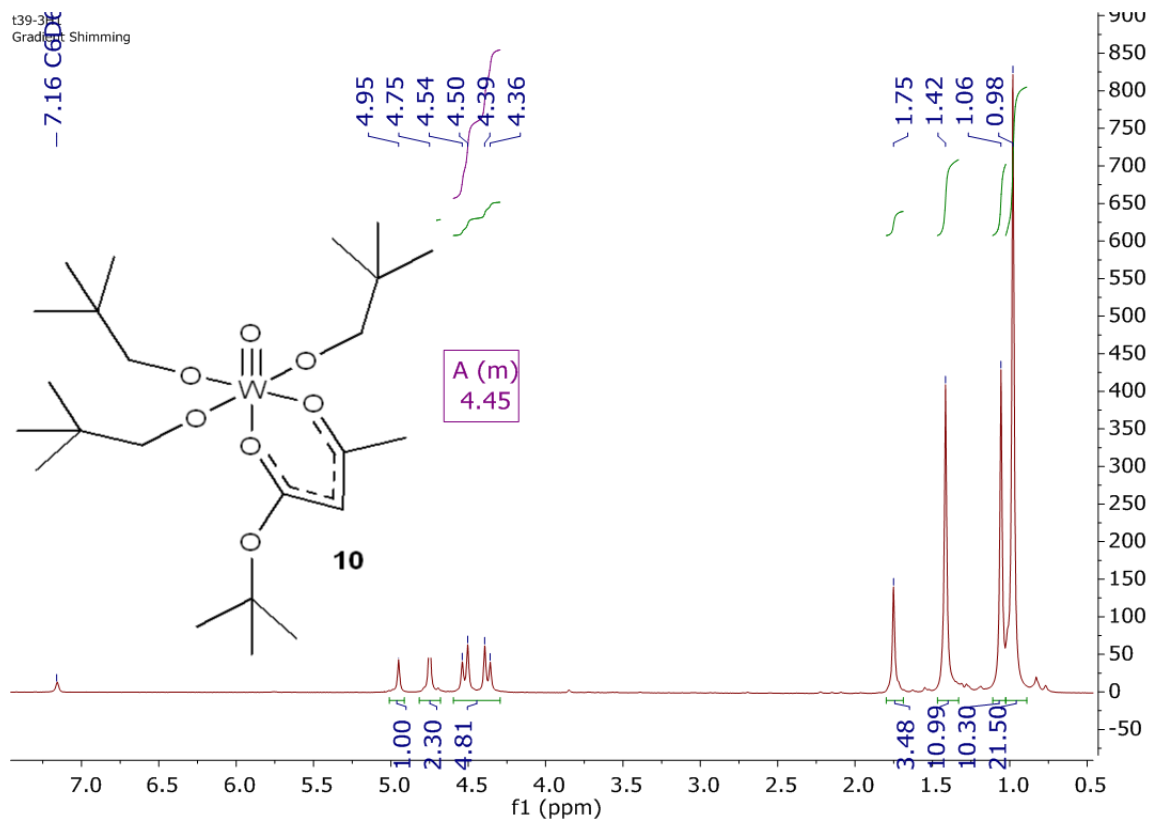

Figure S20: Room temperature  $^1\text{H}$  NMR of **10** in  $\text{C}_6\text{D}_6$ .

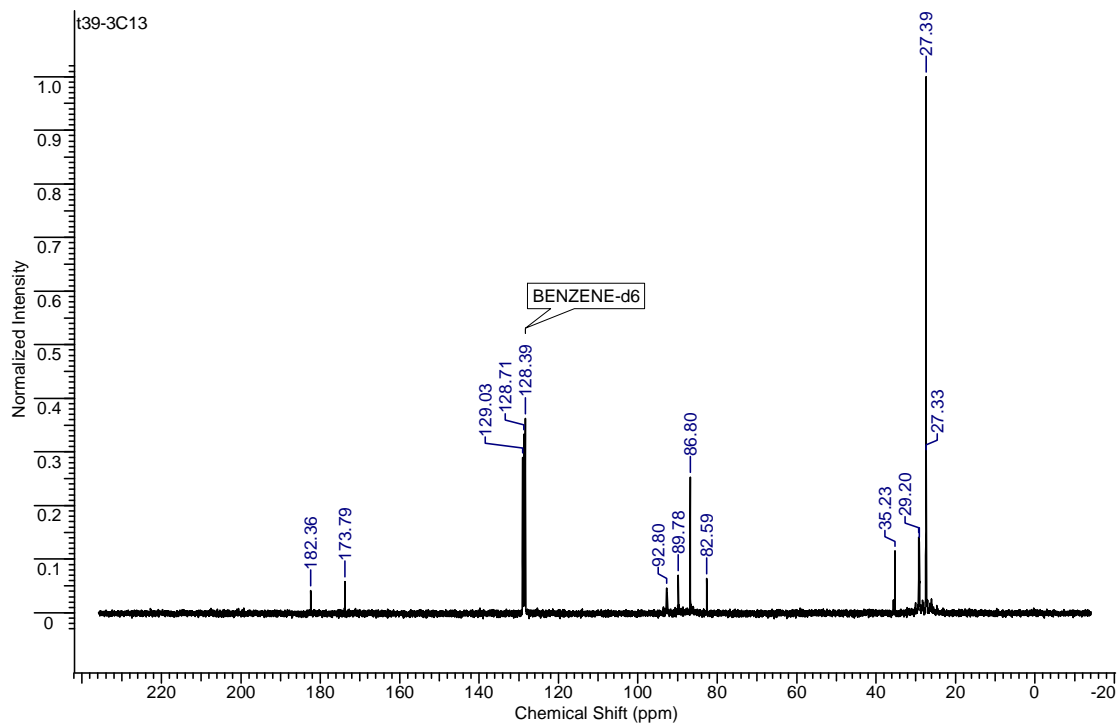

Figure S21: Room temperature  $^{13}\text{C}$  NMR of **10** in  $\text{C}_6\text{D}_6$ .

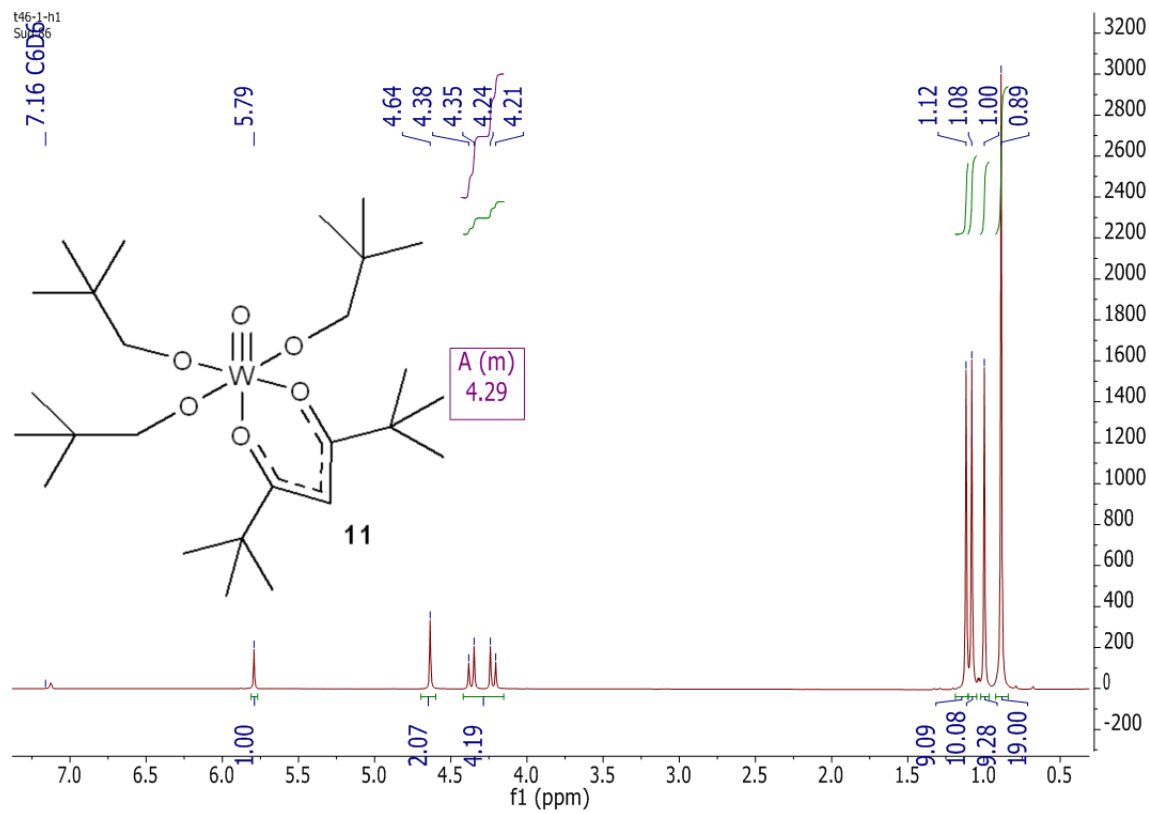

Figure S22a: Room temperature  $^1\text{H}$  NMR of **11** in  $\text{C}_6\text{D}_6$ .

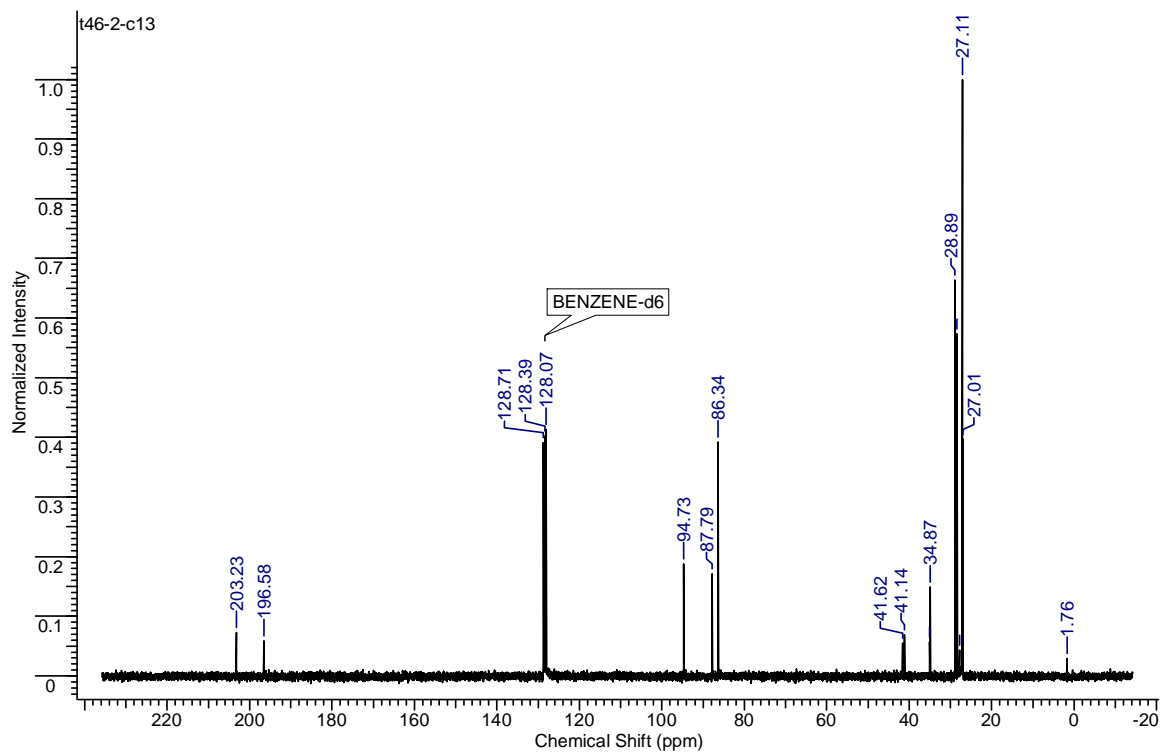

Figure S22b: Room temperature  $^{13}\text{C}$  NMR of **11** in  $\text{C}_6\text{D}_6$ .

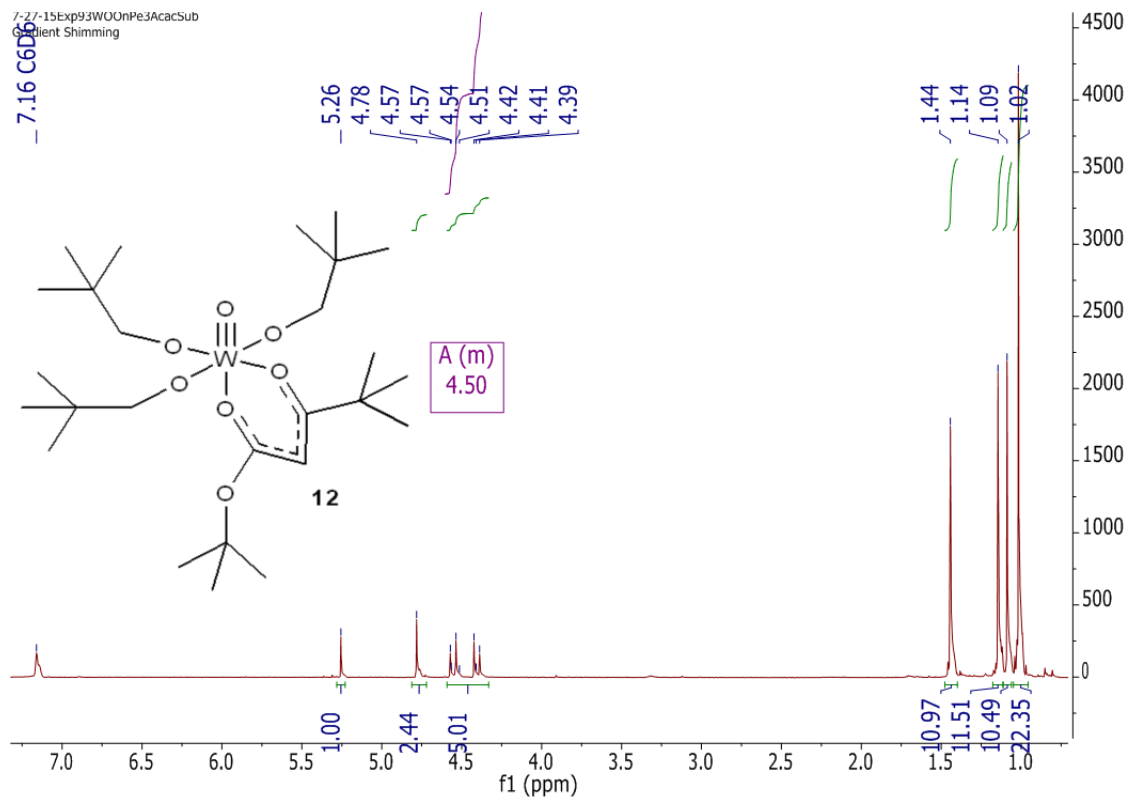

Figure S23: Room temperature  $^1\text{H}$  NMR of **12** in  $\text{C}_6\text{D}_6$ .

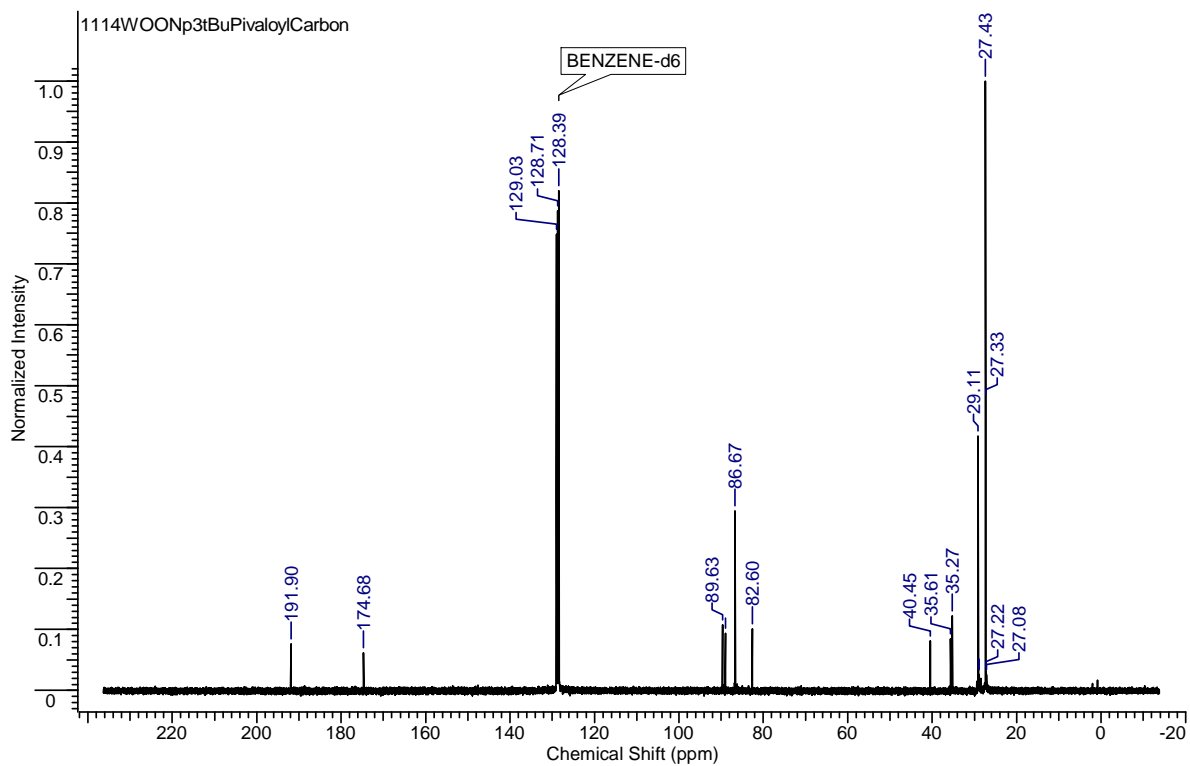

Figure S24: Room temperature  $^{13}\text{C}$  NMR of **12** in  $\text{C}_6\text{D}_6$ .

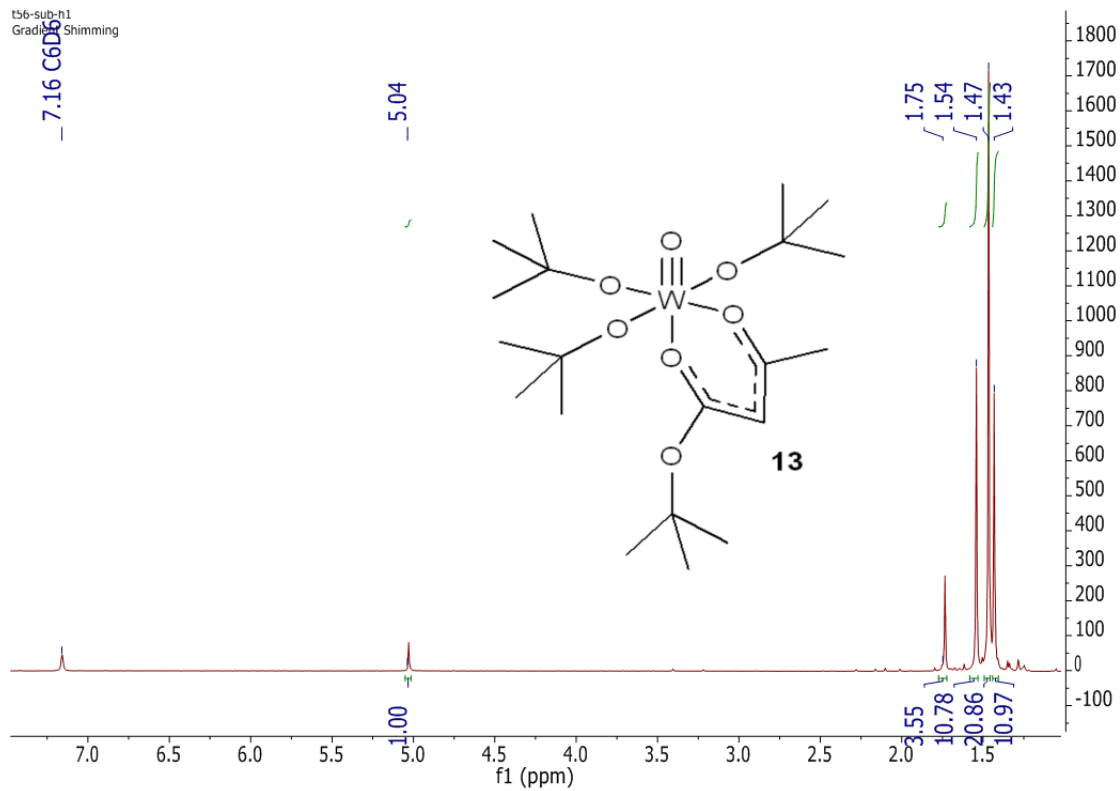

Figure S25a: Room temperature  $^1\text{H}$  NMR of **13** in  $\text{C}_6\text{D}_6$ .

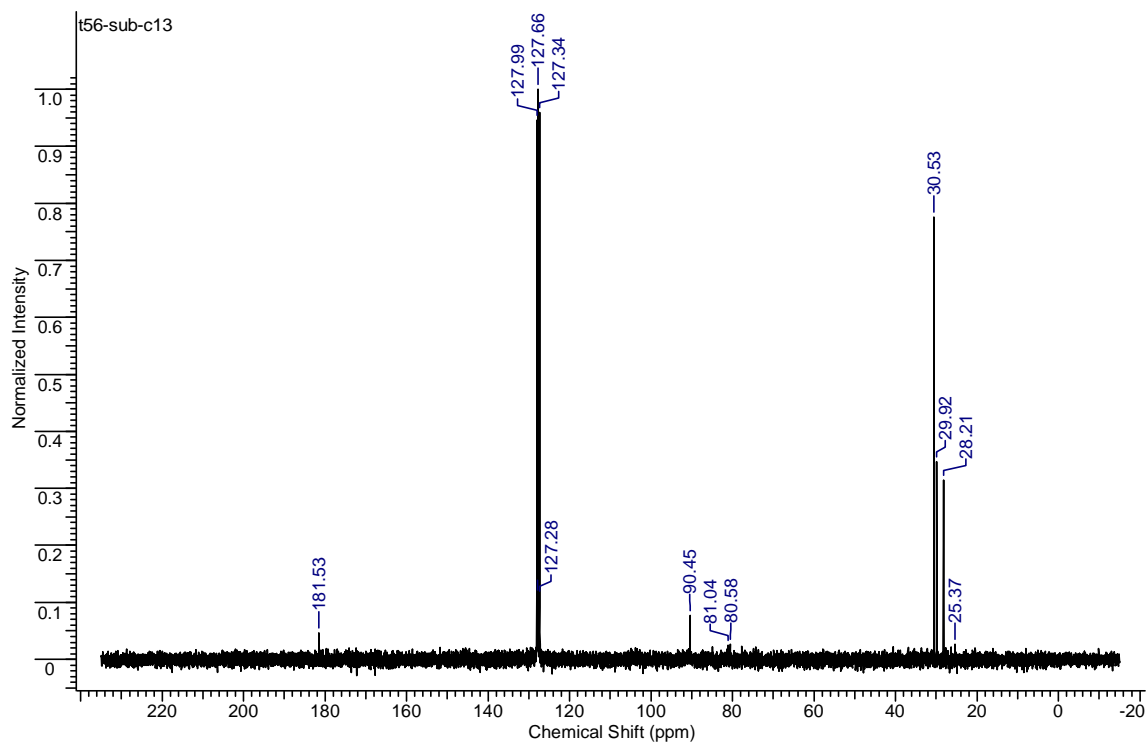

Figure S25b: Room temperature  $^{13}\text{C}$  NMR of **13** in  $\text{C}_6\text{D}_6$ .



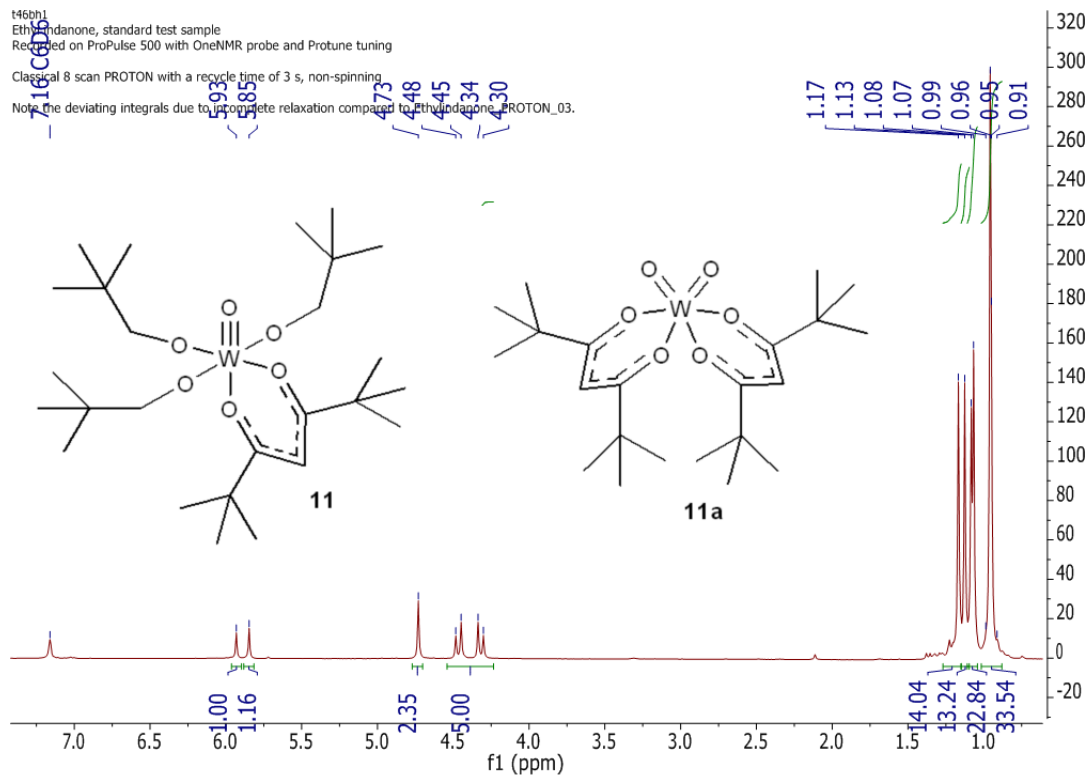

Figure S26a: Room temperature  $^1\text{H}$  NMR of **11** and **11a** in  $\text{C}_6\text{D}_6$ .

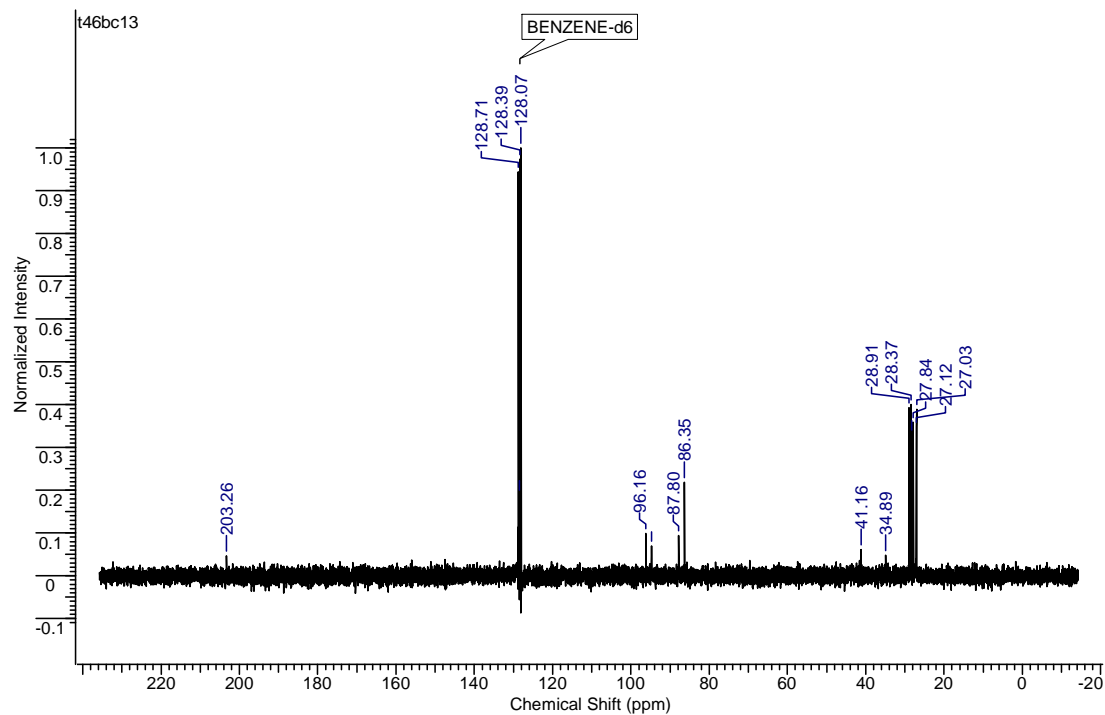

Figure S26b: Room temperature  $^{13}\text{C}$  NMR of **11** and **11a** in  $\text{C}_6\text{D}_6$ .

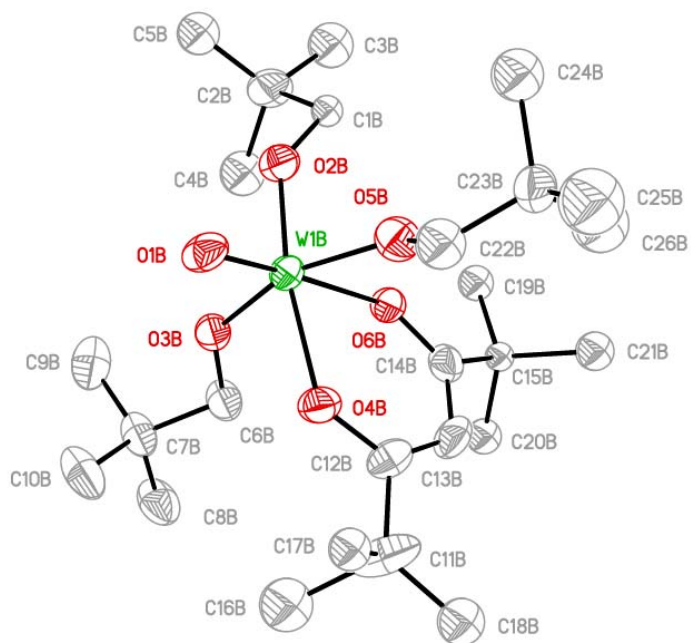

Figure S27. Molecular geometry of a second independent molecule of **11** present in the sample crystallized from toluene.

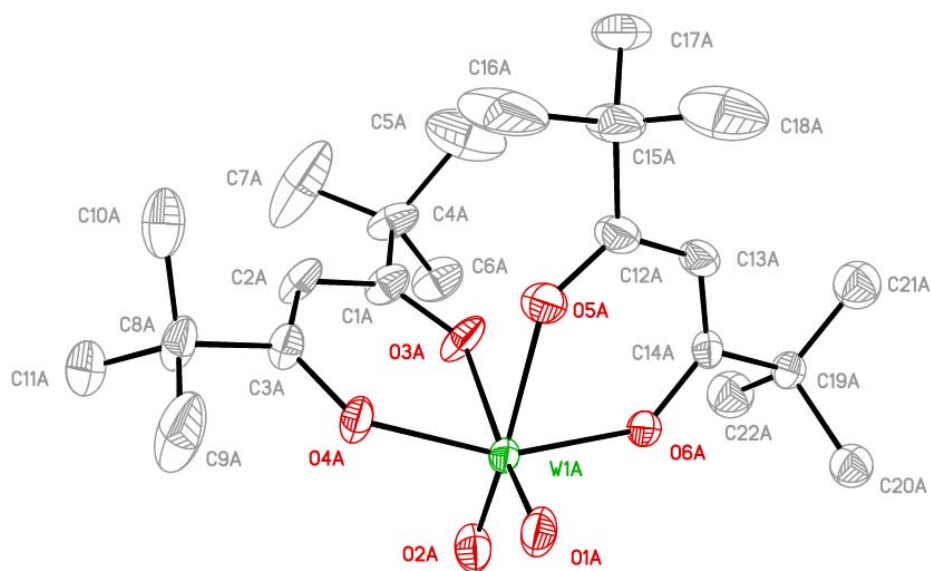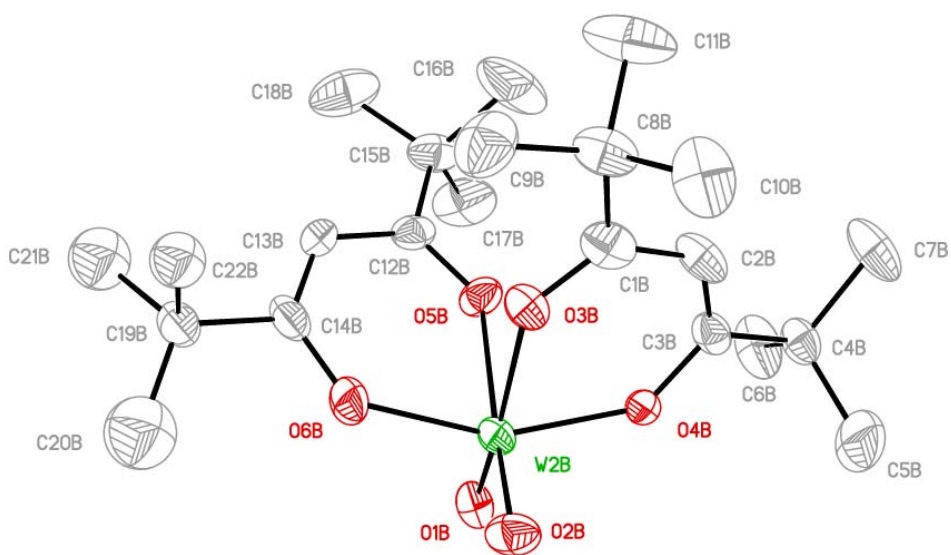

Figures S28a (top) and S28b (bottom). Molecular geometry of the two independent molecules present in the sample of **11a** crystallized from toluene.

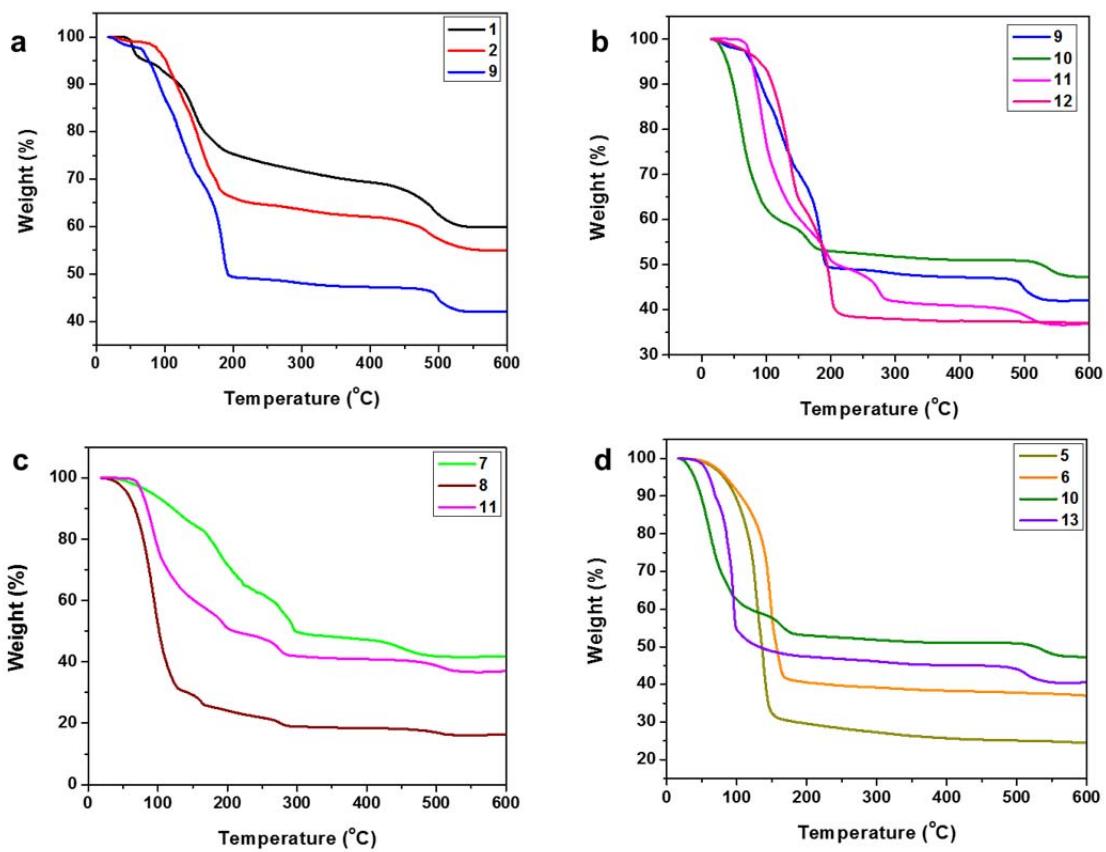

Figure S29. TGA of complexes  $WO(OR)_3L$ ; a) 1, 2, 9, b) 9, 10, 11, 12, c) 7, 8, 11 and d) 5, 6, 10, 13.

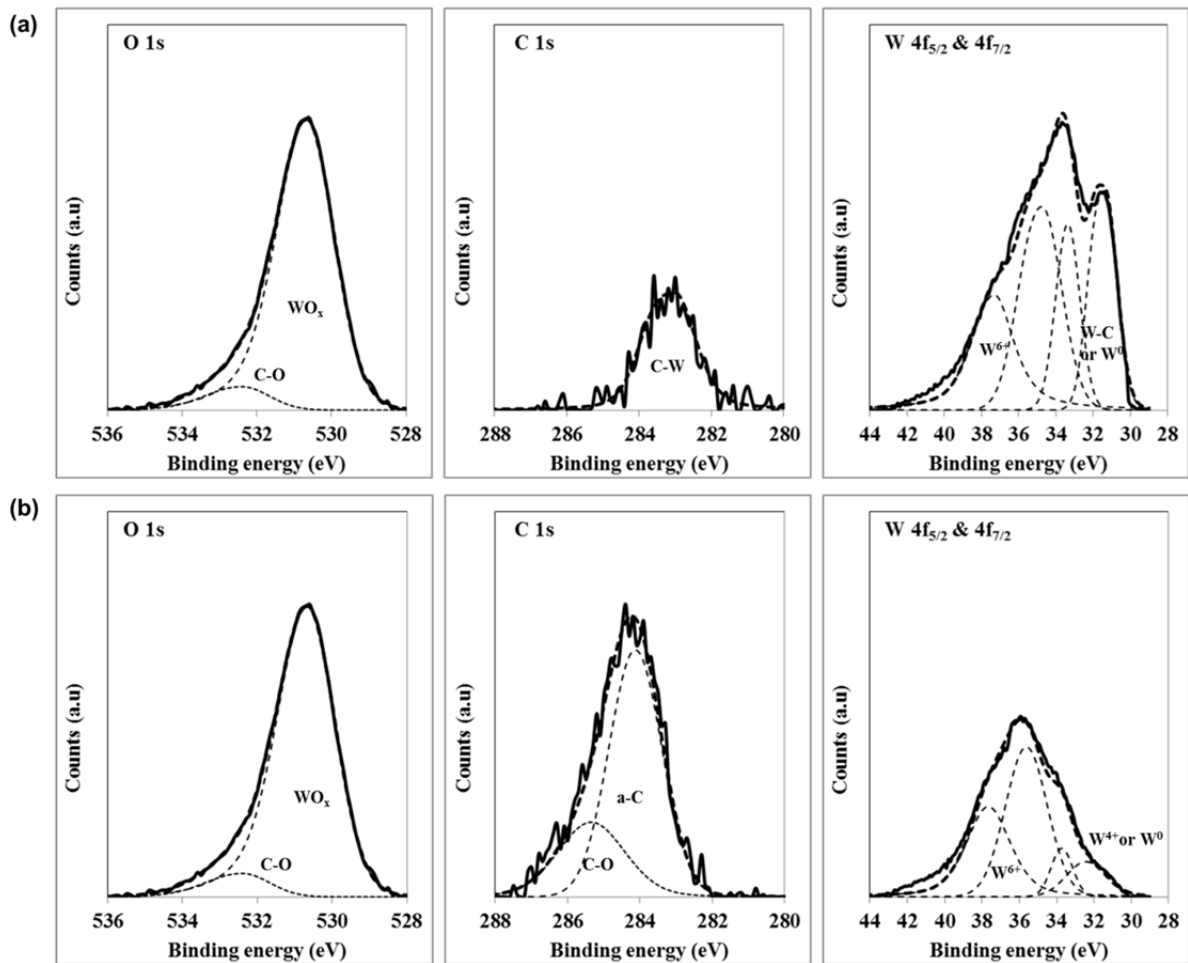

Figure S30. Deconvoluted O 1s, C 1s, and W 4f<sub>5/2</sub> and 4f<sub>7/2</sub> peaks of materials grown at a) 200 °C and b) 500 °C.

\* The RBD Auger Scan software was used to deconvolute the XPS peaks. The Shirley base line was subtracted before peak fitting. The W 4f<sub>7/2</sub> and 4f<sub>5/2</sub> peak doublet area ratio was fixed to 4:3. The peak intensities for the same element show relative signal counts for each growth temperature.

Table S1: Selected properties of **1–13**.

| Compound  | Physical features/Characterization/Yield                                                                                                                                                                                                     |
|-----------|----------------------------------------------------------------------------------------------------------------------------------------------------------------------------------------------------------------------------------------------|
| <b>1</b>  | Yellowish-orange solid, vaporizes 65-70 °C at 100-150 mTorr, melting ~ 60 °C prior to vaporization. Yield from sublimation 0.86 g; 77 %. Clean <sup>1</sup> H NMR, sublimate good enough for single crystal X-ray crystallography.           |
| <b>2</b>  | Orange moist/semi solid, sublimed 60-65 °C at 150-200 mTorr. Yield from sublimation 0.72 g; 63%. Clean <sup>1</sup> H NMR.                                                                                                                   |
| <b>3</b>  | Orange liquid, distills 60-65 °C; ~ 200 mTorr. Yield 0.58 g; 53 %. Clean NMR, low viscosity.                                                                                                                                                 |
| <b>4</b>  | Orange liquid, distills 70-75 °C; ~ 200 mTorr. Yield of distillate 0.95; 68 %. Very low viscosity. Clean <sup>1</sup> H NMR.                                                                                                                 |
| <b>5</b>  | Orange liquid, distills 60-65 °C; ~ 150-200 mTorr. Yield of distillate 0.66 g; 51%. Low viscosity, Clean <sup>1</sup> H NMR.                                                                                                                 |
| <b>6</b>  | Orange liquid, distills 60-65 °C; ~ 150-200 mTorr. Yield of distillate 0.68 g; 55 %. Low viscosity, Clean <sup>1</sup> H NMR.                                                                                                                |
| <b>7</b>  | Orange liquid, distills 70-80 °C at 300-350 mTorr. Yield 0.8 g; 60 %. Low viscosity. Clean <sup>1</sup> H NMR.                                                                                                                               |
| <b>8</b>  | Orange liquid, distills 70-80 °C; ~ 250-300 mTorr. Yield 0.72 g; 55 %. Low viscosity. Clean <sup>1</sup> H NMR.                                                                                                                              |
| <b>9</b>  | Orange liquid, distills 60-65 °C; ~ 200 mTorr. Yield 0.53 g; 52 %. Clean NMR, slightly higher viscosity.                                                                                                                                     |
| <b>10</b> | Pale orange waxy crystalline solid, vaporizes 55-60 °C; 150-200 mTorr. Melts ~35-40 °C prior to vaporization. Yield from sublimation 0.62 g; 55 %. Clean <sup>1</sup> H NMR, sublimate good enough for single crystal X-Ray crystallography. |
| <b>11</b> | Light brown solid, sublimed 90-100 °C at 300- 350 mTorr. Yield 0.68 g; 57 %. Clean <sup>1</sup> H NMR.                                                                                                                                       |
| <b>12</b> | White solid, sublimed 90-105 °C at 200-250 mTorr. Yield 0.46 g; 39 %. Clean <sup>1</sup> H NMR.                                                                                                                                              |
| <b>13</b> | White needles, sublimed 50-65 °C at 350 mTorr. Yield 0.46 g; 39 %. Clean <sup>1</sup> H NMR.                                                                                                                                                 |

Table S2. Summary of  $m/z$  values and relative abundances for positive ion DPCI mass spectra of **1, 2, 9, 10-13**.

| Compound (MW)   | % rel. abundance ( $m/z$ ) [ion]                                                                                                                                                                                                                                                                                                                                                                        |
|-----------------|---------------------------------------------------------------------------------------------------------------------------------------------------------------------------------------------------------------------------------------------------------------------------------------------------------------------------------------------------------------------------------------------------------|
| <b>1</b> (392)  | 753 (23) [M+(M-OCH <sub>3</sub> )] <sup>+</sup> ; 685 (1) [M+(M-acac)] <sup>+</sup> ; 421 (3) [M+C <sub>2</sub> H <sub>5</sub> ] <sup>+</sup> ; 361 (100) [M-OCH <sub>3</sub> ] <sup>+</sup> ; 331 (2) [M-2OCH <sub>3</sub> ] <sup>+</sup> ; 293 (31) [M-acac] <sup>+</sup> ; 101 (5) [Hacac+H] <sup>+</sup>                                                                                            |
| <b>2</b> (434)  | 823 (28) [M+(M-OC <sub>2</sub> H <sub>5</sub> )] <sup>+</sup> ; 769 (4) [M+(M-acac)] <sup>+</sup> ; 463 (7) [M+C <sub>2</sub> H <sub>5</sub> ] <sup>+</sup> ; 389 (100) [M-OC <sub>2</sub> H <sub>5</sub> ] <sup>+</sup> ; 335 (39) [M-acac] <sup>+</sup> ; 101 (3) [Hacac+H] <sup>+</sup>                                                                                                              |
| <b>9</b> (560)  | 1033 (4) [M+(M-NpO)] <sup>+</sup> ; 1021 (0.5) [M+(M-acac)] <sup>+</sup> ; 561 (3) [M+H] <sup>+</sup> ; 473 (14) [M-NpO] <sup>+</sup> ; 461 (2) [M-acac] <sup>+</sup> ; 101 (100) [Hacac+H] <sup>+</sup> ; 89 (28) [NpOH+H] <sup>+</sup> ; 71 (3) [CH <sub>3</sub> ] <sub>3</sub> CCH <sub>2</sub> <sup>+</sup>                                                                                         |
| <b>10</b> (618) | 619 (1) [M+H] <sup>+</sup> ; 531 (31) [(M+H)-NpO] <sup>+</sup> ; 477 (35) [(M-tbac)+CH <sub>4</sub> ] <sup>+</sup> ; 461 (46) [(M+H)-tbac] <sup>+</sup> ; 391 (7) [M-2(NpO)-tbac+OH] <sup>+</sup> ; 158 (18) [Htbac+H] <sup>+</sup> ; 89 (58) [NpOH+H] <sup>+</sup> ; 71 (100) [CH <sub>3</sub> ] <sub>3</sub> CCH <sub>2</sub> <sup>+</sup> ; 57 (72) [C(CH <sub>3</sub> ) <sub>3</sub> ] <sup>+</sup> |
| <b>11</b> (644) | 673 (4) [M+C <sub>2</sub> H <sub>5</sub> ] <sup>+</sup> ; 645 (2) [M+H] <sup>+</sup> ; 557 (100) [M-NpO] <sup>+</sup> ; 461 (9) [M-dpm] <sup>+</sup> ; 185 (10) [Hdpm+H] <sup>+</sup> ; 89 (34) [NpOH+H] <sup>+</sup> ; 71 (17) [CH <sub>3</sub> ] <sub>3</sub> CCH <sub>2</sub> <sup>+</sup> ; 57 (16) [C(CH <sub>3</sub> ) <sub>3</sub> ] <sup>+</sup>                                                |
| <b>12</b> (660) | 573 (55) [M-NpO] <sup>+</sup> ; 517 (98) [M-OR-(CH <sub>3</sub> ) <sub>3</sub> C] <sup>+</sup> ; 461 (20) [(M)-tbpa] <sup>+</sup> ; 71 (100) [CH <sub>2</sub> C(CH <sub>3</sub> ) <sub>3</sub> ] <sup>+</sup> ; 57 (23) [C(CH <sub>3</sub> ) <sub>3</sub> ] <sup>+</sup>                                                                                                                                |
| <b>13</b> (576) | 577 (0.6) [M+H] <sup>+</sup> ; 502 (14) [(M- <sup>t</sup> BuO)] <sup>+</sup> ; 419 (13) [M-tbac] <sup>+</sup> ; 103 (58) [OC(OH)CHC(CH <sub>3</sub> )O] <sup>+</sup> ; 57 (100) [C(CH <sub>3</sub> ) <sub>3</sub> ] <sup>+</sup>                                                                                                                                                                        |

Table S3. Crystal data and structure refinement for **11a**.

|                                   |                                                                   |                   |
|-----------------------------------|-------------------------------------------------------------------|-------------------|
| Identification code               | <b>11a</b>                                                        |                   |
| Empirical formula                 | C <sub>46.50</sub> H <sub>82</sub> O <sub>12</sub> W <sub>2</sub> |                   |
| Formula weight                    | 1200.82                                                           |                   |
| Temperature                       | 100(2) K                                                          |                   |
| Wavelength                        | 0.71073 Å                                                         |                   |
| Crystal system                    | Monoclinic                                                        |                   |
| Space group                       | P 2 <sub>1</sub> /n                                               |                   |
| Unit cell dimensions              | a = 18.4587(8) Å                                                  | α = 90°.          |
|                                   | b = 15.2076(7) Å                                                  | β = 104.2143(7)°. |
|                                   | c = 19.5770(8) Å                                                  | γ = 90°.          |
| Volume                            | 5327.3(4) Å <sup>3</sup>                                          |                   |
| Z                                 | 4                                                                 |                   |
| Density (calculated)              | 1.497 Mg/m <sup>3</sup>                                           |                   |
| Absorption coefficient            | 4.368 mm <sup>-1</sup>                                            |                   |
| F(000)                            | 2420                                                              |                   |
| Crystal size                      | 0.171 x 0.171 x 0.158 mm <sup>3</sup>                             |                   |
| Theta range for data collection   | 1.359 to 27.499°.                                                 |                   |
| Index ranges                      | -23 ≤ h ≤ 19, -19 ≤ k ≤ 19, -25 ≤ l ≤ 24                          |                   |
| Reflections collected             | 29301                                                             |                   |
| Independent reflections           | 11486 [R(int) = 0.0476]                                           |                   |
| Completeness to theta = 25.242°   | 95.1 %                                                            |                   |
| Absorption correction             | Analytical                                                        |                   |
| Max. and min. transmission        | 0.6458 and 0.5675                                                 |                   |
| Refinement method                 | Full-matrix least-squares on F <sup>2</sup>                       |                   |
| Data / restraints / parameters    | 11486 / 0 / 569                                                   |                   |
| Goodness-of-fit on F <sup>2</sup> | 0.946                                                             |                   |
| Final R indices [I > 2σ(I)]       | R1 = 0.0327, wR2 = 0.0705 [8128]                                  |                   |
| R indices (all data)              | R1 = 0.0551, wR2 = 0.0763                                         |                   |
| Extinction coefficient            | n/a                                                               |                   |
| Largest diff. peak and hole       | 1.911 and -1.115 e.Å <sup>-3</sup>                                |                   |

$$R1 = \frac{\sum(|F_o| - |F_c|)}{\sum|F_o|}$$

$$wR2 = \frac{[\sum[w(F_o^2 - F_c^2)^2] / \sum(w(F_o^2)^2)]^{1/2}}{S}$$

$$S = \frac{[\sum[w(F_o^2)^2 - F_c^2]^2]^{1/2}}{(n-p)}$$

$$w = 1/[\sigma^2(F_o^2) + (m \cdot p)^2 + n \cdot p], \quad p = [\max(F_o^2, 0) + 2 \cdot F_c^2] / 3, \quad m \text{ \& \ } n \text{ are constants}$$



Table S4. Atomic coordinates ( $\times 10^4$ ) and equivalent isotropic displacement parameters ( $\text{\AA}^2 \times 10^3$ ) for **1**.  $U(\text{eq})$  is defined as one third of the trace of the orthogonalized  $U^{ij}$  tensor.

|    | x        | y       | z       | $U(\text{eq})$ |
|----|----------|---------|---------|----------------|
| W1 | 837(1)   | 7518(1) | 6536(1) | 10(1)          |
| O1 | 101(2)   | 8525(1) | 7305(1) | 18(1)          |
| O2 | 1549(2)  | 8600(1) | 5468(1) | 14(1)          |
| O3 | 1773(2)  | 6307(1) | 5465(1) | 15(1)          |
| O4 | 501(2)   | 6252(1) | 7310(1) | 17(1)          |
| O5 | -1370(2) | 7384(1) | 5655(1) | 17(1)          |
| O6 | 3354(2)  | 7567(1) | 7032(1) | 16(1)          |
| C1 | 2274(3)  | 8495(2) | 4630(2) | 14(1)          |
| C2 | 2738(3)  | 7494(2) | 4220(2) | 14(1)          |
| C3 | 2432(3)  | 6438(2) | 4638(2) | 15(1)          |
| C4 | 2545(4)  | 9577(2) | 4108(2) | 24(1)          |
| C5 | 2855(4)  | 5402(2) | 4088(2) | 23(1)          |
| C6 | 1698(4)  | 5319(2) | 7553(2) | 24(1)          |
| C7 | -1941(3) | 7280(2) | 4602(2) | 26(1)          |
| C8 | 5071(3)  | 7522(2) | 6660(2) | 21(1)          |

Table S5. Bond lengths [Å] and angles [°] for **1**.

---

|          |            |
|----------|------------|
| W1-O1    | 1.7175(16) |
| W1-O4    | 1.8723(16) |
| W1-O5    | 1.8793(15) |
| W1-O6    | 1.8807(15) |
| W1-O2    | 2.0450(16) |
| W1-O3    | 2.2087(16) |
| O2-C1    | 1.305(3)   |
| O3-C3    | 1.271(3)   |
| O4-C6    | 1.433(3)   |
| O5-C7    | 1.418(3)   |
| O6-C8    | 1.415(3)   |
| C1-C2    | 1.381(3)   |
| C1-C4    | 1.498(3)   |
| C2-C3    | 1.414(3)   |
| C2-H2    | 0.9500     |
| C3-C5    | 1.496(3)   |
| C4-H4A   | 0.9800     |
| C4-H4B   | 0.9800     |
| C4-H4C   | 0.9800     |
| C5-H5A   | 0.9800     |
| C5-H5B   | 0.9800     |
| C5-H5C   | 0.9800     |
| C6-H6A   | 0.9800     |
| C6-H6B   | 0.9800     |
| C6-H6C   | 0.9800     |
| C7-H7A   | 0.9800     |
| C7-H7B   | 0.9800     |
| C7-H7C   | 0.9800     |
| C8-H8A   | 0.9800     |
| C8-H8B   | 0.9800     |
| C8-H8C   | 0.9800     |
| O1-W1-O4 | 99.62(7)   |
| O1-W1-O5 | 96.85(8)   |
| O4-W1-O5 | 96.30(7)   |

|            |            |
|------------|------------|
| O1-W1-O6   | 98.05(7)   |
| O4-W1-O6   | 91.50(7)   |
| O5-W1-O6   | 161.78(7)  |
| O1-W1-O2   | 95.64(7)   |
| O4-W1-O2   | 164.55(7)  |
| O5-W1-O2   | 84.14(7)   |
| O6-W1-O2   | 84.01(7)   |
| O1-W1-O3   | 176.17(7)  |
| O4-W1-O3   | 84.10(7)   |
| O5-W1-O3   | 81.75(6)   |
| O6-W1-O3   | 82.70(6)   |
| O2-W1-O3   | 80.68(6)   |
| C1-O2-W1   | 134.84(14) |
| C3-O3-W1   | 131.73(15) |
| C6-O4-W1   | 129.53(15) |
| C7-O5-W1   | 138.17(14) |
| C8-O6-W1   | 139.08(13) |
| O2-C1-C2   | 124.9(2)   |
| O2-C1-C4   | 114.1(2)   |
| C2-C1-C4   | 121.0(2)   |
| C1-C2-C3   | 124.26(19) |
| C1-C2-H2   | 117.9      |
| C3-C2-H2   | 117.9      |
| O3-C3-C2   | 123.5(2)   |
| O3-C3-C5   | 116.7(2)   |
| C2-C3-C5   | 119.8(2)   |
| C1-C4-H4A  | 109.5      |
| C1-C4-H4B  | 109.5      |
| H4A-C4-H4B | 109.5      |
| C1-C4-H4C  | 109.5      |
| H4A-C4-H4C | 109.5      |
| H4B-C4-H4C | 109.5      |
| C3-C5-H5A  | 109.5      |
| C3-C5-H5B  | 109.5      |
| H5A-C5-H5B | 109.5      |
| C3-C5-H5C  | 109.5      |

|            |       |
|------------|-------|
| H5A-C5-H5C | 109.5 |
| H5B-C5-H5C | 109.5 |
| O4-C6-H6A  | 109.5 |
| O4-C6-H6B  | 109.5 |
| H6A-C6-H6B | 109.5 |
| O4-C6-H6C  | 109.5 |
| H6A-C6-H6C | 109.5 |
| H6B-C6-H6C | 109.5 |
| O5-C7-H7A  | 109.5 |
| O5-C7-H7B  | 109.5 |
| H7A-C7-H7B | 109.5 |
| O5-C7-H7C  | 109.5 |
| H7A-C7-H7C | 109.5 |
| H7B-C7-H7C | 109.5 |
| O6-C8-H8A  | 109.5 |
| O6-C8-H8B  | 109.5 |
| H8A-C8-H8B | 109.5 |
| O6-C8-H8C  | 109.5 |
| H8A-C8-H8C | 109.5 |
| H8B-C8-H8C | 109.5 |

---

Table S6. Atomic coordinates ( $\times 10^4$ ) and equivalent isotropic displacement parameters ( $\text{\AA}^2 \times 10^3$ ) for **10**.  $U(\text{eq})$  is defined as one third of the trace of the orthogonalized  $U^{ij}$  tensor.

|       | x        | y       | z        | $U(\text{eq})$ |
|-------|----------|---------|----------|----------------|
| W(1)  | 5921(1)  | 2069(1) | 9288(1)  | 28(1)          |
| O(1)  | 4576(3)  | 1678(2) | 8627(1)  | 49(1)          |
| O(2)  | 5898(2)  | 1440(1) | 10162(1) | 32(1)          |
| O(3)  | 4912(2)  | 2865(1) | 9683(1)  | 32(1)          |
| O(4)  | 6337(2)  | 2878(1) | 8523(1)  | 37(1)          |
| O(5)  | 7433(2)  | 1521(1) | 9030(1)  | 47(1)          |
| O(6)  | 7604(2)  | 2724(1) | 10104(1) | 23(1)          |
| O(7)  | 8888(2)  | 3760(1) | 10590(1) | 24(1)          |
| C(1)  | 5877(6)  | 1638(3) | 10987(3) | 36(2)          |
| C(2)  | 5407(7)  | 991(4)  | 11427(4) | 29(2)          |
| C(3)  | 4049(8)  | 647(5)  | 11044(4) | 56(2)          |
| C(4)  | 5373(7)  | 1272(4) | 12262(4) | 50(2)          |
| C(5)  | 6530(7)  | 317(4)  | 11505(4) | 55(2)          |
| C(1') | 6695(8)  | 1182(5) | 10802(4) | 35(2)          |
| C(2') | 5862(10) | 935(5)  | 11440(5) | 30(2)          |
| C(3') | 4836(9)  | 300(5)  | 11124(5) | 48(2)          |
| C(4') | 4942(12) | 1649(7) | 11586(7) | 82(4)          |
| C(5') | 6871(13) | 727(8)  | 12140(7) | 92(4)          |
| C(6)  | 3450(3)  | 3001(2) | 9520(2)  | 42(1)          |
| C(7)  | 3110(3)  | 3810(2) | 9767(2)  | 40(1)          |
| C(8)  | 1516(4)  | 3899(3) | 9589(2)  | 64(1)          |
| C(9)  | 3667(4)  | 3908(3) | 10651(2) | 51(1)          |
| C(10) | 3743(4)  | 4403(2) | 9288(2)  | 51(1)          |
| C(11) | 6751(4)  | 4011(2) | 7855(2)  | 47(1)          |
| C(12) | 6991(3)  | 3540(2) | 8602(2)  | 30(1)          |
| C(13) | 7802(3)  | 3802(2) | 9284(2)  | 25(1)          |
| C(14) | 8058(3)  | 3381(2) | 10010(2) | 22(1)          |
| C(15) | 9203(3)  | 3490(2) | 11430(2) | 25(1)          |
| C(16) | 9929(3)  | 2715(2) | 11503(2) | 33(1)          |
| C(17) | 7854(3)  | 3497(2) | 11738(2) | 30(1)          |
| C(18) | 10197(3) | 4115(2) | 11823(2) | 34(1)          |

|        |          |         |         |       |
|--------|----------|---------|---------|-------|
| C(21)  | 8913(7)  | 1261(4) | 9509(4) | 37(2) |
| C(22)  | 9787(4)  | 1229(2) | 8861(2) | 44(1) |
| C(23)  | 9962(9)  | 2006(5) | 8544(5) | 62(2) |
| C(24)  | 9438(8)  | 600(5)  | 8319(5) | 49(2) |
| C(25)  | 11374(8) | 1040(5) | 9435(5) | 61(2) |
| C(22') | 8421(7)  | 1790(4) | 8574(4) | 38(2) |
| C(23') | 10224(9) | 1300(5) | 9669(5) | 60(3) |
| C(24') | 9181(10) | 398(6)  | 8620(6) | 64(3) |
| C(25') | 10758(8) | 1462(5) | 8330(5) | 52(2) |

---

Table S7. Bond lengths [ $\text{\AA}$ ] and angles [ $^\circ$ ] for **10**.

---

|              |            |
|--------------|------------|
| W(1)-O(1)    | 1.699(2)   |
| W(1)-O(2)    | 1.860(2)   |
| W(1)-O(5)    | 1.882(2)   |
| W(1)-O(3)    | 1.897(2)   |
| W(1)-O(4)    | 2.021(2)   |
| W(1)-O(6)    | 2.2454(19) |
| O(2)-C(1')   | 1.296(7)   |
| O(2)-C(1)    | 1.466(6)   |
| O(3)-C(6)    | 1.418(4)   |
| O(4)-C(12)   | 1.307(3)   |
| O(5)-C(22')  | 1.438(7)   |
| O(5)-C(21)   | 1.580(7)   |
| O(6)-C(14)   | 1.244(3)   |
| O(7)-C(14)   | 1.327(3)   |
| O(7)-C(15)   | 1.492(3)   |
| C(1)-C(2)    | 1.477(9)   |
| C(1)-H(1A)   | 0.9900     |
| C(1)-H(1B)   | 0.9900     |
| C(2)-C(3)    | 1.484(9)   |
| C(2)-C(4)    | 1.524(9)   |
| C(2)-C(5)    | 1.589(10)  |
| C(3)-H(3A)   | 0.9800     |
| C(3)-H(3B)   | 0.9800     |
| C(3)-H(3C)   | 0.9800     |
| C(4)-H(4A)   | 0.9800     |
| C(4)-H(4B)   | 0.9800     |
| C(4)-H(4C)   | 0.9800     |
| C(5)-H(5A)   | 0.9800     |
| C(5)-H(5B)   | 0.9800     |
| C(5)-H(5C)   | 0.9800     |
| C(1')-C(2')  | 1.552(11)  |
| C(1')-H(1'A) | 0.9900     |
| C(1')-H(1'B) | 0.9900     |
| C(2')-C(5')  | 1.442(14)  |

|              |           |
|--------------|-----------|
| C(2')-C(3')  | 1.513(12) |
| C(2')-C(4')  | 1.578(14) |
| C(3')-H(3'A) | 0.9800    |
| C(3')-H(3'B) | 0.9800    |
| C(3')-H(3'C) | 0.9800    |
| C(4')-H(4'A) | 0.9800    |
| C(4')-H(4'B) | 0.9800    |
| C(4')-H(4'C) | 0.9800    |
| C(5')-H(5'A) | 0.9800    |
| C(5')-H(5'B) | 0.9800    |
| C(5')-H(5'C) | 0.9800    |
| C(6)-C(7)    | 1.520(5)  |
| C(6)-H(6A)   | 0.9900    |
| C(6)-H(6B)   | 0.9900    |
| C(7)-C(9)    | 1.519(4)  |
| C(7)-C(10)   | 1.524(5)  |
| C(7)-C(8)    | 1.533(4)  |
| C(8)-H(8A)   | 0.9800    |
| C(8)-H(8B)   | 0.9800    |
| C(8)-H(8C)   | 0.9800    |
| C(9)-H(9A)   | 0.9800    |
| C(9)-H(9B)   | 0.9800    |
| C(9)-H(9C)   | 0.9800    |
| C(10)-H(10A) | 0.9800    |
| C(10)-H(10B) | 0.9800    |
| C(10)-H(10C) | 0.9800    |
| C(11)-C(12)  | 1.501(4)  |
| C(11)-H(11A) | 0.9800    |
| C(11)-H(11B) | 0.9800    |
| C(11)-H(11C) | 0.9800    |
| C(12)-C(13)  | 1.358(4)  |
| C(13)-C(14)  | 1.426(4)  |
| C(13)-H(13A) | 0.9500    |
| C(15)-C(16)  | 1.512(4)  |
| C(15)-C(17)  | 1.516(4)  |
| C(15)-C(18)  | 1.519(4)  |



|               |           |
|---------------|-----------|
| C(16)-H(16A)  | 0.9800    |
| C(16)-H(16B)  | 0.9800    |
| C(16)-H(16C)  | 0.9800    |
| C(17)-H(17A)  | 0.9800    |
| C(17)-H(17B)  | 0.9800    |
| C(17)-H(17C)  | 0.9800    |
| C(18)-H(18A)  | 0.9800    |
| C(18)-H(18B)  | 0.9800    |
| C(18)-H(18C)  | 0.9800    |
| C(21)-C(22)   | 1.535(7)  |
| C(21)-H(21A)  | 0.9900    |
| C(21)-H(21B)  | 0.9900    |
| C(22)-C(23')  | 1.378(8)  |
| C(22)-C(24)   | 1.431(8)  |
| C(22)-C(23)   | 1.476(8)  |
| C(22)-C(25')  | 1.498(8)  |
| C(22)-C(24')  | 1.579(10) |
| C(22)-C(22')  | 1.645(8)  |
| C(22)-C(25)   | 1.696(9)  |
| C(23)-H(23A)  | 0.9800    |
| C(23)-H(23B)  | 0.9800    |
| C(23)-H(23C)  | 0.9800    |
| C(24)-H(24A)  | 0.9800    |
| C(24)-H(24B)  | 0.9800    |
| C(24)-H(24C)  | 0.9800    |
| C(25)-H(25A)  | 0.9800    |
| C(25)-H(25B)  | 0.9800    |
| C(25)-H(25C)  | 0.9800    |
| C(22')-H(22A) | 0.9900    |
| C(22')-H(22B) | 0.9900    |
| C(23')-H(23D) | 0.9800    |
| C(23')-H(23E) | 0.9800    |
| C(23')-H(23F) | 0.9800    |
| C(24')-H(24D) | 0.9800    |
| C(24')-H(24E) | 0.9800    |
| C(24')-H(24F) | 0.9800    |

|                  |            |
|------------------|------------|
| C(25')-H(25D)    | 0.9800     |
| C(25')-H(25E)    | 0.9800     |
| C(25')-H(25F)    | 0.9800     |
| O(1)-W(1)-O(2)   | 100.18(10) |
| O(1)-W(1)-O(5)   | 100.27(12) |
| O(2)-W(1)-O(5)   | 91.85(10)  |
| O(1)-W(1)-O(3)   | 98.22(11)  |
| O(2)-W(1)-O(3)   | 92.59(9)   |
| O(5)-W(1)-O(3)   | 159.90(9)  |
| O(1)-W(1)-O(4)   | 93.91(9)   |
| O(2)-W(1)-O(4)   | 165.91(9)  |
| O(5)-W(1)-O(4)   | 85.75(10)  |
| O(3)-W(1)-O(4)   | 85.18(9)   |
| O(1)-W(1)-O(6)   | 173.12(10) |
| O(2)-W(1)-O(6)   | 85.16(8)   |
| O(5)-W(1)-O(6)   | 83.77(8)   |
| O(3)-W(1)-O(6)   | 77.08(8)   |
| O(4)-W(1)-O(6)   | 80.78(8)   |
| C(1')-O(2)-W(1)  | 142.0(4)   |
| C(1)-O(2)-W(1)   | 130.6(3)   |
| C(6)-O(3)-W(1)   | 128.6(2)   |
| C(12)-O(4)-W(1)  | 134.32(18) |
| C(22')-O(5)-W(1) | 127.5(3)   |
| C(21)-O(5)-W(1)  | 134.4(3)   |
| C(14)-O(6)-W(1)  | 128.12(18) |
| C(14)-O(7)-C(15) | 123.5(2)   |
| O(2)-C(1)-C(2)   | 112.7(5)   |
| O(2)-C(1)-H(1A)  | 109.0      |
| C(2)-C(1)-H(1A)  | 109.0      |
| O(2)-C(1)-H(1B)  | 109.0      |
| C(2)-C(1)-H(1B)  | 109.0      |
| H(1A)-C(1)-H(1B) | 107.8      |
| C(1)-C(2)-C(3)   | 114.8(6)   |
| C(1)-C(2)-C(4)   | 108.1(5)   |
| C(3)-C(2)-C(4)   | 111.2(6)   |

|                     |          |
|---------------------|----------|
| C(1)-C(2)-C(5)      | 108.7(6) |
| C(3)-C(2)-C(5)      | 106.4(6) |
| C(4)-C(2)-C(5)      | 107.4(5) |
| C(2)-C(3)-H(3A)     | 109.5    |
| C(2)-C(3)-H(3B)     | 109.5    |
| H(3A)-C(3)-H(3B)    | 109.5    |
| C(2)-C(3)-H(3C)     | 109.5    |
| H(3A)-C(3)-H(3C)    | 109.5    |
| H(3B)-C(3)-H(3C)    | 109.5    |
| C(2)-C(4)-H(4A)     | 109.5    |
| C(2)-C(4)-H(4B)     | 109.5    |
| H(4A)-C(4)-H(4B)    | 109.5    |
| C(2)-C(4)-H(4C)     | 109.5    |
| H(4A)-C(4)-H(4C)    | 109.5    |
| H(4B)-C(4)-H(4C)    | 109.5    |
| C(2)-C(5)-H(5A)     | 109.5    |
| C(2)-C(5)-H(5B)     | 109.5    |
| H(5A)-C(5)-H(5B)    | 109.5    |
| C(2)-C(5)-H(5C)     | 109.5    |
| H(5A)-C(5)-H(5C)    | 109.5    |
| H(5B)-C(5)-H(5C)    | 109.5    |
| O(2)-C(1')-C(2')    | 112.8(6) |
| O(2)-C(1')-H(1'A)   | 109.0    |
| C(2')-C(1')-H(1'A)  | 109.0    |
| O(2)-C(1')-H(1'B)   | 109.0    |
| C(2')-C(1')-H(1'B)  | 109.0    |
| H(1'A)-C(1')-H(1'B) | 107.8    |
| C(5')-C(2')-C(3')   | 114.3(9) |
| C(5')-C(2')-C(1')   | 107.0(8) |
| C(3')-C(2')-C(1')   | 110.5(7) |
| C(5')-C(2')-C(4')   | 112.2(9) |
| C(3')-C(2')-C(4')   | 105.7(8) |
| C(1')-C(2')-C(4')   | 106.9(8) |
| C(2')-C(3')-H(3'A)  | 109.5    |
| C(2')-C(3')-H(3'B)  | 109.5    |
| H(3'A)-C(3')-H(3'B) | 109.5    |

|                     |          |
|---------------------|----------|
| C(2')-C(3')-H(3'C)  | 109.5    |
| H(3'A)-C(3')-H(3'C) | 109.5    |
| H(3'B)-C(3')-H(3'C) | 109.5    |
| C(2')-C(4')-H(4'A)  | 109.5    |
| C(2')-C(4')-H(4'B)  | 109.5    |
| H(4'A)-C(4')-H(4'B) | 109.5    |
| C(2')-C(4')-H(4'C)  | 109.5    |
| H(4'A)-C(4')-H(4'C) | 109.5    |
| H(4'B)-C(4')-H(4'C) | 109.5    |
| C(2')-C(5')-H(5'A)  | 109.5    |
| C(2')-C(5')-H(5'B)  | 109.5    |
| H(5'A)-C(5')-H(5'B) | 109.5    |
| C(2')-C(5')-H(5'C)  | 109.5    |
| H(5'A)-C(5')-H(5'C) | 109.5    |
| H(5'B)-C(5')-H(5'C) | 109.5    |
| O(3)-C(6)-C(7)      | 111.5(3) |
| O(3)-C(6)-H(6A)     | 109.3    |
| C(7)-C(6)-H(6A)     | 109.3    |
| O(3)-C(6)-H(6B)     | 109.3    |
| C(7)-C(6)-H(6B)     | 109.3    |
| H(6A)-C(6)-H(6B)    | 108.0    |
| C(9)-C(7)-C(6)      | 109.2(3) |
| C(9)-C(7)-C(10)     | 111.3(3) |
| C(6)-C(7)-C(10)     | 109.6(3) |
| C(9)-C(7)-C(8)      | 109.6(3) |
| C(6)-C(7)-C(8)      | 107.8(3) |
| C(10)-C(7)-C(8)     | 109.2(3) |
| C(7)-C(8)-H(8A)     | 109.5    |
| C(7)-C(8)-H(8B)     | 109.5    |
| H(8A)-C(8)-H(8B)    | 109.5    |
| C(7)-C(8)-H(8C)     | 109.5    |
| H(8A)-C(8)-H(8C)    | 109.5    |
| H(8B)-C(8)-H(8C)    | 109.5    |
| C(7)-C(9)-H(9A)     | 109.5    |
| C(7)-C(9)-H(9B)     | 109.5    |
| H(9A)-C(9)-H(9B)    | 109.5    |

|                     |          |
|---------------------|----------|
| C(7)-C(9)-H(9C)     | 109.5    |
| H(9A)-C(9)-H(9C)    | 109.5    |
| H(9B)-C(9)-H(9C)    | 109.5    |
| C(7)-C(10)-H(10A)   | 109.5    |
| C(7)-C(10)-H(10B)   | 109.5    |
| H(10A)-C(10)-H(10B) | 109.5    |
| C(7)-C(10)-H(10C)   | 109.5    |
| H(10A)-C(10)-H(10C) | 109.5    |
| H(10B)-C(10)-H(10C) | 109.5    |
| C(12)-C(11)-H(11A)  | 109.5    |
| C(12)-C(11)-H(11B)  | 109.5    |
| H(11A)-C(11)-H(11B) | 109.5    |
| C(12)-C(11)-H(11C)  | 109.5    |
| H(11A)-C(11)-H(11C) | 109.5    |
| H(11B)-C(11)-H(11C) | 109.5    |
| O(4)-C(12)-C(13)    | 124.9(3) |
| O(4)-C(12)-C(11)    | 113.4(3) |
| C(13)-C(12)-C(11)   | 121.7(3) |
| C(12)-C(13)-C(14)   | 123.9(3) |
| C(12)-C(13)-H(13A)  | 118.0    |
| C(14)-C(13)-H(13A)  | 118.0    |
| O(6)-C(14)-O(7)     | 122.3(3) |
| O(6)-C(14)-C(13)    | 125.2(3) |
| O(7)-C(14)-C(13)    | 112.4(3) |
| O(7)-C(15)-C(16)    | 111.2(2) |
| O(7)-C(15)-C(17)    | 108.1(2) |
| C(16)-C(15)-C(17)   | 113.8(3) |
| O(7)-C(15)-C(18)    | 101.5(2) |
| C(16)-C(15)-C(18)   | 110.4(3) |
| C(17)-C(15)-C(18)   | 111.2(2) |
| C(15)-C(16)-H(16A)  | 109.5    |
| C(15)-C(16)-H(16B)  | 109.5    |
| H(16A)-C(16)-H(16B) | 109.5    |
| C(15)-C(16)-H(16C)  | 109.5    |
| H(16A)-C(16)-H(16C) | 109.5    |
| H(16B)-C(16)-H(16C) | 109.5    |

|                     |          |
|---------------------|----------|
| C(15)-C(17)-H(17A)  | 109.5    |
| C(15)-C(17)-H(17B)  | 109.5    |
| H(17A)-C(17)-H(17B) | 109.5    |
| C(15)-C(17)-H(17C)  | 109.5    |
| H(17A)-C(17)-H(17C) | 109.5    |
| H(17B)-C(17)-H(17C) | 109.5    |
| C(15)-C(18)-H(18A)  | 109.5    |
| C(15)-C(18)-H(18B)  | 109.5    |
| H(18A)-C(18)-H(18B) | 109.5    |
| C(15)-C(18)-H(18C)  | 109.5    |
| H(18A)-C(18)-H(18C) | 109.5    |
| H(18B)-C(18)-H(18C) | 109.5    |
| C(22)-C(21)-O(5)    | 102.4(4) |
| C(22)-C(21)-H(21A)  | 111.3    |
| O(5)-C(21)-H(21A)   | 111.3    |
| C(22)-C(21)-H(21B)  | 111.3    |
| O(5)-C(21)-H(21B)   | 111.3    |
| H(21A)-C(21)-H(21B) | 109.2    |
| C(24)-C(22)-C(23)   | 118.9(6) |
| C(23')-C(22)-C(25') | 119.1(6) |
| C(24)-C(22)-C(21)   | 114.0(5) |
| C(23)-C(22)-C(21)   | 111.0(5) |
| C(23')-C(22)-C(24') | 111.8(6) |
| C(25')-C(22)-C(24') | 109.5(5) |
| C(23')-C(22)-C(22') | 108.6(5) |
| C(25')-C(22)-C(22') | 103.4(5) |
| C(24')-C(22)-C(22') | 102.8(5) |
| C(24)-C(22)-C(25)   | 107.7(5) |
| C(23)-C(22)-C(25)   | 103.4(5) |
| C(21)-C(22)-C(25)   | 99.2(4)  |
| C(22)-C(23)-H(23A)  | 109.5    |
| C(22)-C(23)-H(23B)  | 109.5    |
| H(23A)-C(23)-H(23B) | 109.5    |
| C(22)-C(23)-H(23C)  | 109.5    |
| H(23A)-C(23)-H(23C) | 109.5    |
| H(23B)-C(23)-H(23C) | 109.5    |

|                      |          |
|----------------------|----------|
| C(22)-C(24)-H(24A)   | 109.5    |
| C(22)-C(24)-H(24B)   | 109.5    |
| H(24A)-C(24)-H(24B)  | 109.5    |
| C(22)-C(24)-H(24C)   | 109.5    |
| H(24A)-C(24)-H(24C)  | 109.5    |
| H(24B)-C(24)-H(24C)  | 109.5    |
| C(22)-C(25)-H(25A)   | 109.5    |
| C(22)-C(25)-H(25B)   | 109.5    |
| H(25A)-C(25)-H(25B)  | 109.5    |
| C(22)-C(25)-H(25C)   | 109.5    |
| H(25A)-C(25)-H(25C)  | 109.5    |
| H(25B)-C(25)-H(25C)  | 109.5    |
| O(5)-C(22')-C(22)    | 103.7(4) |
| O(5)-C(22')-H(22A)   | 111.0    |
| C(22)-C(22')-H(22A)  | 111.0    |
| O(5)-C(22')-H(22B)   | 111.0    |
| C(22)-C(22')-H(22B)  | 111.0    |
| H(22A)-C(22')-H(22B) | 109.0    |
| C(22)-C(23')-H(23D)  | 109.5    |
| C(22)-C(23')-H(23E)  | 109.5    |
| H(23D)-C(23')-H(23E) | 109.5    |
| C(22)-C(23')-H(23F)  | 109.5    |
| H(23D)-C(23')-H(23F) | 109.5    |
| H(23E)-C(23')-H(23F) | 109.5    |
| C(22)-C(24')-H(24D)  | 109.5    |
| C(22)-C(24')-H(24E)  | 109.5    |
| H(24D)-C(24')-H(24E) | 109.5    |
| C(22)-C(24')-H(24F)  | 109.5    |
| H(24D)-C(24')-H(24F) | 109.5    |
| H(24E)-C(24')-H(24F) | 109.5    |
| C(22)-C(25')-H(25D)  | 109.5    |
| C(22)-C(25')-H(25E)  | 109.5    |
| H(25D)-C(25')-H(25E) | 109.5    |
| C(22)-C(25')-H(25F)  | 109.5    |
| H(25D)-C(25')-H(25F) | 109.5    |
| H(25E)-C(25')-H(25F) | 109.5    |

---

Table S8. Atomic coordinates ( $\times 10^4$ ) and equivalent isotropic displacement parameters ( $\text{\AA}^2 \times 10^3$ ) for **11**. U(eq) is defined as one third of the trace of the orthogonalized  $U^{ij}$  tensor.

|        | x         | y        | z        | U(eq)  |
|--------|-----------|----------|----------|--------|
| W(1A)  | 7978(1)   | 7760(1)  | 5936(1)  | 30(1)  |
| O(1A)  | 7648(3)   | 7267(3)  | 6597(3)  | 62(2)  |
| O(2A)  | 8426(2)   | 8456(2)  | 6630(3)  | 39(1)  |
| O(3A)  | 8828(3)   | 7274(2)  | 6010(3)  | 48(1)  |
| O(4A)  | 7589(3)   | 7158(2)  | 4964(3)  | 42(1)  |
| O(5A)  | 7168(3)   | 8296(3)  | 5526(4)  | 57(1)  |
| O(6A)  | 8375(2)   | 8323(2)  | 4987(3)  | 39(1)  |
| C(2A)  | 9336(3)   | 9288(3)  | 7190(4)  | 38(1)  |
| C(1A)  | 8615(4)   | 9138(4)  | 6618(5)  | 27(2)  |
| C(3A)  | 9329(7)   | 9157(7)  | 8064(8)  | 58(3)  |
| C(4A)  | 9513(6)   | 10038(6) | 7051(7)  | 49(3)  |
| C(5A)  | 9880(7)   | 8816(7)  | 6910(8)  | 63(3)  |
| C(1C)  | 9012(11)  | 8895(11) | 6450(12) | 45(4)  |
| C(3C)  | 9558(13)  | 8854(13) | 7948(14) | 56(6)  |
| C(4C)  | 9927(13)  | 9717(12) | 7103(15) | 57(6)  |
| C(5C)  | 8752(12)  | 9785(11) | 7374(14) | 52(5)  |
| C(7A)  | 9799(4)   | 6572(4)  | 5795(5)  | 47(2)  |
| C(6A)  | 9005(4)   | 6589(4)  | 5858(5)  | 27(2)  |
| C(8A)  | 9830(5)   | 7030(5)  | 5042(6)  | 41(2)  |
| C(9A)  | 10297(8)  | 6791(8)  | 6516(9)  | 58(4)  |
| C(10A) | 9927(5)   | 5817(5)  | 5555(6)  | 38(2)  |
| C(6C)  | 9440(15)  | 7175(14) | 5582(18) | 59(7)  |
| C(8C)  | 10450(20) | 6560(20) | 5400(20) | 90(11) |
| C(9C)  | 10290(17) | 6840(16) | 6769(19) | 48(7)  |
| C(10C) | 9590(20)  | 5970(20) | 6010(30) | 96(12) |
| C(11A) | 7123(5)   | 6585(5)  | 3706(5)  | 64(2)  |
| C(12A) | 7559(3)   | 7181(3)  | 4185(4)  | 36(1)  |
| C(13A) | 7877(3)   | 7675(4)  | 3821(4)  | 38(1)  |
| C(14A) | 8276(3)   | 8229(3)  | 4236(4)  | 35(1)  |
| C(15A) | 8636(4)   | 8718(4)  | 3753(4)  | 45(2)  |
| C(16A) | 6696(7)   | 6271(6)  | 4094(8)  | 21(2)  |



|        |          |          |          |         |
|--------|----------|----------|----------|---------|
| C(17A) | 7730(11) | 6227(11) | 3365(13) | 56(5)   |
| C(18A) | 6706(10) | 6989(9)  | 2837(11) | 45(4)   |
| C(16C) | 6300(9)  | 6674(9)  | 3794(10) | 75(4)   |
| C(17C) | 7351(10) | 5897(9)  | 4169(11) | 84(5)   |
| C(18C) | 7110(6)  | 6482(6)  | 2863(7)  | 39(2)   |
| C(19A) | 9096(5)  | 9232(4)  | 4330(6)  | 70(3)   |
| C(20A) | 8052(5)  | 9090(5)  | 3117(6)  | 83(3)   |
| C(21A) | 9104(4)  | 8319(4)  | 3288(4)  | 51(2)   |
| C(23A) | 6103(4)  | 8905(4)  | 4889(5)  | 48(2)   |
| C(22A) | 6444(6)  | 8242(5)  | 5249(7)  | 26(2)   |
| C(24A) | 5308(7)  | 8790(8)  | 4531(9)  | 43(3)   |
| C(25A) | 6472(8)  | 9139(8)  | 4196(9)  | 47(3)   |
| C(26A) | 6216(10) | 9517(10) | 5451(11) | 47(4)   |
| C(22C) | 6760(30) | 8600(30) | 4900(30) | 250(30) |
| C(24C) | 5970(30) | 9280(30) | 4170(40) | 270(30) |
| C(25C) | 5530(30) | 8490(30) | 4930(40) | 280(30) |
| C(26C) | 6229(12) | 9380(11) | 5666(13) | 60(5)   |
| W(1B)  | 3513(1)  | 7285(1)  | 5122(1)  | 30(1)   |
| O(1B)  | 3891(2)  | 7717(2)  | 4450(3)  | 39(1)   |
| O(2B)  | 3106(2)  | 6560(2)  | 4448(3)  | 35(1)   |
| O(3B)  | 2646(2)  | 7777(2)  | 4965(3)  | 36(1)   |
| O(4B)  | 3835(2)  | 7947(2)  | 6066(3)  | 38(1)   |
| O(5B)  | 4308(2)  | 6768(2)  | 5659(3)  | 43(1)   |
| O(6B)  | 3080(2)  | 6766(2)  | 6067(2)  | 35(1)   |
| C(2B)  | 2117(4)  | 5808(4)  | 3913(4)  | 49(2)   |
| C(1B)  | 2835(5)  | 5876(4)  | 4480(5)  | 24(2)   |
| C(3B)  | 1861(8)  | 5058(7)  | 4089(8)  | 56(3)   |
| C(4B)  | 1596(7)  | 6323(7)  | 4222(8)  | 54(3)   |
| C(5B)  | 2081(7)  | 5892(7)  | 3059(7)  | 46(3)   |
| C(1D)  | 2487(12) | 6215(12) | 4576(13) | 62(5)   |
| C(3D)  | 1543(12) | 5411(13) | 3941(15) | 68(6)   |
| C(4D)  | 2732(12) | 5279(12) | 3746(14) | 64(6)   |
| C(5D)  | 2026(11) | 6251(11) | 3048(12) | 52(5)   |
| C(6B)  | 2191(4)  | 8000(3)  | 5466(4)  | 39(1)   |
| C(7B)  | 1697(4)  | 8564(3)  | 5055(4)  | 42(2)   |
| C(8B)  | 1236(4)  | 8776(4)  | 5641(5)  | 56(2)   |

|        |          |          |          |       |
|--------|----------|----------|----------|-------|
| C(9B)  | 1213(4)  | 8287(4)  | 4263(5)  | 56(2) |
| C(10B) | 2121(4)  | 9174(4)  | 4864(5)  | 57(2) |
| C(12B) | 3917(4)  | 7902(4)  | 6855(4)  | 40(1) |
| C(13B) | 3665(4)  | 7367(4)  | 7241(4)  | 40(2) |
| C(14B) | 3233(4)  | 6832(3)  | 6829(4)  | 38(1) |
| C(11B) | 4260(5)  | 8552(5)  | 7296(5)  | 64(2) |
| C(16B) | 3646(7)  | 9181(7)  | 6953(8)  | 61(3) |
| C(17B) | 4792(6)  | 8822(5)  | 6923(6)  | 34(2) |
| C(18B) | 4390(6)  | 8564(6)  | 8178(7)  | 47(2) |
| C(16D) | 3735(13) | 8905(13) | 7566(15) | 59(6) |
| C(17D) | 5054(15) | 8636(15) | 7058(17) | 64(7) |
| C(18D) | 4764(11) | 8187(11) | 8239(12) | 47(5) |
| C(15B) | 2800(6)  | 6324(5)  | 7275(6)  | 22(2) |
| C(19B) | 2316(7)  | 5829(6)  | 6700(7)  | 34(2) |
| C(20B) | 2346(8)  | 6762(8)  | 7716(9)  | 34(3) |
| C(21B) | 3366(7)  | 5926(6)  | 7904(8)  | 38(3) |
| C(15D) | 3058(9)  | 6339(8)  | 7417(10) | 35(4) |
| C(19D) | 2654(10) | 5757(9)  | 6869(11) | 51(4) |
| C(20D) | 2526(11) | 6693(11) | 7830(13) | 45(5) |
| C(21D) | 3666(10) | 6060(10) | 8061(11) | 51(4) |
| C(23B) | 5427(4)  | 6198(4)  | 6219(4)  | 47(2) |
| C(22B) | 5013(8)  | 6827(8)  | 5917(10) | 49(3) |
| C(24B) | 5272(8)  | 5623(8)  | 5520(10) | 53(4) |
| C(25B) | 6180(10) | 6306(11) | 6552(13) | 76(5) |
| C(26B) | 5068(11) | 5875(10) | 6900(12) | 69(5) |
| C(22D) | 4977(8)  | 6590(8)  | 5501(10) | 50(3) |
| C(24D) | 6131(10) | 6041(10) | 5944(12) | 72(5) |
| C(25D) | 5695(10) | 6798(10) | 6912(11) | 68(5) |
| C(26D) | 5094(12) | 5663(12) | 6509(15) | 84(6) |

---

Table S9. Bond lengths [ $\text{\AA}$ ] and angles [ $^\circ$ ] for **11**.

---

|              |           |
|--------------|-----------|
| W(1A)-O(1A)  | 1.702(5)  |
| W(1A)-O(2A)  | 1.866(4)  |
| W(1A)-O(5A)  | 1.877(5)  |
| W(1A)-O(3A)  | 1.877(5)  |
| W(1A)-O(4A)  | 2.008(4)  |
| W(1A)-O(6A)  | 2.217(4)  |
| O(2A)-C(1A)  | 1.380(9)  |
| O(2A)-C(1C)  | 1.51(2)   |
| O(3A)-C(6A)  | 1.419(9)  |
| O(3A)-C(6C)  | 1.54(3)   |
| O(4A)-C(12A) | 1.296(7)  |
| O(5A)-C(22C) | 1.30(6)   |
| O(5A)-C(22A) | 1.373(12) |
| O(6A)-C(14A) | 1.243(7)  |
| C(2A)-C(4C)  | 1.45(2)   |
| C(2A)-C(1C)  | 1.47(2)   |
| C(2A)-C(3A)  | 1.494(14) |
| C(2A)-C(3C)  | 1.51(2)   |
| C(2A)-C(1A)  | 1.526(10) |
| C(2A)-C(4A)  | 1.534(13) |
| C(2A)-C(5A)  | 1.552(14) |
| C(2A)-C(5C)  | 1.58(2)   |
| C(1A)-H(1AA) | 0.9900    |
| C(1A)-H(1AB) | 0.9900    |
| C(3A)-H(3AA) | 0.9800    |
| C(3A)-H(3AB) | 0.9800    |
| C(3A)-H(3AC) | 0.9800    |
| C(4A)-H(4AA) | 0.9800    |
| C(4A)-H(4AB) | 0.9800    |
| C(4A)-H(4AC) | 0.9800    |
| C(5A)-H(5AA) | 0.9800    |
| C(5A)-H(5AB) | 0.9800    |
| C(5A)-H(5AC) | 0.9800    |
| C(1C)-H(1CA) | 0.9900    |

|               |           |
|---------------|-----------|
| C(1C)-H(1CB)  | 0.9900    |
| C(3C)-H(3CA)  | 0.9800    |
| C(3C)-H(3CB)  | 0.9800    |
| C(3C)-H(3CC)  | 0.9800    |
| C(4C)-H(4CA)  | 0.9800    |
| C(4C)-H(4CB)  | 0.9800    |
| C(4C)-H(4CC)  | 0.9800    |
| C(5C)-H(5CA)  | 0.9800    |
| C(5C)-H(5CB)  | 0.9800    |
| C(5C)-H(5CC)  | 0.9800    |
| C(7A)-C(10C)  | 1.32(4)   |
| C(7A)-C(6C)   | 1.37(3)   |
| C(7A)-C(9A)   | 1.425(16) |
| C(7A)-C(8C)   | 1.55(4)   |
| C(7A)-C(8A)   | 1.561(11) |
| C(7A)-C(10A)  | 1.561(11) |
| C(7A)-C(6A)   | 1.566(10) |
| C(7A)-C(9C)   | 1.77(3)   |
| C(6A)-H(6AA)  | 0.9900    |
| C(6A)-H(6AB)  | 0.9900    |
| C(8A)-H(8AA)  | 0.9800    |
| C(8A)-H(8AB)  | 0.9800    |
| C(8A)-H(8AC)  | 0.9800    |
| C(9A)-H(9AA)  | 0.9800    |
| C(9A)-H(9AB)  | 0.9800    |
| C(9A)-H(9AC)  | 0.9800    |
| C(10A)-H(10A) | 0.9800    |
| C(10A)-H(10B) | 0.9800    |
| C(10A)-H(10C) | 0.9800    |
| C(6C)-H(6CA)  | 0.9900    |
| C(6C)-H(6CB)  | 0.9900    |
| C(8C)-H(8CA)  | 0.9800    |
| C(8C)-H(8CB)  | 0.9800    |
| C(8C)-H(8CC)  | 0.9800    |
| C(9C)-H(9CA)  | 0.9800    |
| C(9C)-H(9CB)  | 0.9800    |

|               |           |
|---------------|-----------|
| C(9C)-H(9CC)  | 0.9800    |
| C(10C)-H(10D) | 0.9800    |
| C(10C)-H(10E) | 0.9800    |
| C(10C)-H(10F) | 0.9800    |
| C(11A)-C(16A) | 1.318(15) |
| C(11A)-C(18C) | 1.424(13) |
| C(11A)-C(12A) | 1.548(10) |
| C(11A)-C(17C) | 1.560(19) |
| C(11A)-C(17A) | 1.58(2)   |
| C(11A)-C(16C) | 1.645(18) |
| C(11A)-C(18A) | 1.689(19) |
| C(12A)-C(13A) | 1.362(9)  |
| C(13A)-C(14A) | 1.414(9)  |
| C(13A)-H(13A) | 0.9500    |
| C(14A)-C(15A) | 1.524(8)  |
| C(15A)-C(19A) | 1.526(12) |
| C(15A)-C(21A) | 1.539(10) |
| C(15A)-C(20A) | 1.542(10) |
| C(16A)-H(16A) | 0.9800    |
| C(16A)-H(16B) | 0.9800    |
| C(16A)-H(16C) | 0.9800    |
| C(17A)-H(17A) | 0.9800    |
| C(17A)-H(17B) | 0.9800    |
| C(17A)-H(17C) | 0.9800    |
| C(18A)-H(18A) | 0.9800    |
| C(18A)-H(18B) | 0.9800    |
| C(18A)-H(18C) | 0.9800    |
| C(16C)-H(16D) | 0.9800    |
| C(16C)-H(16E) | 0.9800    |
| C(16C)-H(16F) | 0.9800    |
| C(17C)-H(17D) | 0.9800    |
| C(17C)-H(17E) | 0.9800    |
| C(17C)-H(17F) | 0.9800    |
| C(18C)-H(18D) | 0.9800    |
| C(18C)-H(18E) | 0.9800    |
| C(18C)-H(18F) | 0.9800    |

|               |           |
|---------------|-----------|
| C(19A)-H(19A) | 0.9800    |
| C(19A)-H(19B) | 0.9800    |
| C(19A)-H(19C) | 0.9800    |
| C(20A)-H(20A) | 0.9800    |
| C(20A)-H(20B) | 0.9800    |
| C(20A)-H(20C) | 0.9800    |
| C(21A)-H(21A) | 0.9800    |
| C(21A)-H(21B) | 0.9800    |
| C(21A)-H(21C) | 0.9800    |
| C(23A)-C(25C) | 1.38(6)   |
| C(23A)-C(24C) | 1.39(6)   |
| C(23A)-C(22C) | 1.39(5)   |
| C(23A)-C(26A) | 1.506(19) |
| C(23A)-C(22A) | 1.513(13) |
| C(23A)-C(24A) | 1.531(16) |
| C(23A)-C(25A) | 1.570(17) |
| C(23A)-C(26C) | 1.57(2)   |
| C(22A)-H(22A) | 0.9900    |
| C(22A)-H(22B) | 0.9900    |
| C(24A)-H(24A) | 0.9800    |
| C(24A)-H(24B) | 0.9800    |
| C(24A)-H(24C) | 0.9800    |
| C(25A)-H(25A) | 0.9800    |
| C(25A)-H(25B) | 0.9800    |
| C(25A)-H(25C) | 0.9800    |
| C(26A)-H(26A) | 0.9800    |
| C(26A)-H(26B) | 0.9800    |
| C(26A)-H(26C) | 0.9800    |
| C(22C)-H(22C) | 0.9900    |
| C(22C)-H(22D) | 0.9900    |
| C(24C)-H(24D) | 0.9800    |
| C(24C)-H(24E) | 0.9800    |
| C(24C)-H(24F) | 0.9800    |
| C(25C)-H(25D) | 0.9800    |
| C(25C)-H(25E) | 0.9800    |
| C(25C)-H(25F) | 0.9800    |

|               |           |
|---------------|-----------|
| C(26C)-H(26D) | 0.9800    |
| C(26C)-H(26E) | 0.9800    |
| C(26C)-H(26F) | 0.9800    |
| W(1B)-O(1B)   | 1.704(4)  |
| W(1B)-O(2B)   | 1.866(4)  |
| W(1B)-O(5B)   | 1.883(5)  |
| W(1B)-O(3B)   | 1.898(4)  |
| W(1B)-O(4B)   | 2.027(4)  |
| W(1B)-O(6B)   | 2.208(4)  |
| O(2B)-C(1D)   | 1.43(2)   |
| O(2B)-C(1B)   | 1.440(9)  |
| O(3B)-C(6B)   | 1.422(7)  |
| O(4B)-C(12B)  | 1.301(7)  |
| O(5B)-C(22B)  | 1.336(15) |
| O(5B)-C(22D)  | 1.424(16) |
| O(6B)-C(14B)  | 1.251(7)  |
| C(2B)-C(3D)   | 1.36(2)   |
| C(2B)-C(1D)   | 1.42(2)   |
| C(2B)-C(5B)   | 1.430(14) |
| C(2B)-C(1B)   | 1.495(11) |
| C(2B)-C(3B)   | 1.593(15) |
| C(2B)-C(4B)   | 1.594(15) |
| C(2B)-C(4D)   | 1.65(2)   |
| C(2B)-C(5D)   | 1.66(2)   |
| C(1B)-H(1BA)  | 0.9900    |
| C(1B)-H(1BB)  | 0.9900    |
| C(3B)-H(3BA)  | 0.9800    |
| C(3B)-H(3BB)  | 0.9800    |
| C(3B)-H(3BC)  | 0.9800    |
| C(4B)-H(4BA)  | 0.9800    |
| C(4B)-H(4BB)  | 0.9800    |
| C(4B)-H(4BC)  | 0.9800    |
| C(5B)-H(5BA)  | 0.9800    |
| C(5B)-H(5BB)  | 0.9800    |
| C(5B)-H(5BC)  | 0.9800    |
| C(1D)-H(1DA)  | 0.9900    |

|               |           |
|---------------|-----------|
| C(1D)-H(1DB)  | 0.9900    |
| C(3D)-H(3DA)  | 0.9800    |
| C(3D)-H(3DB)  | 0.9800    |
| C(3D)-H(3DC)  | 0.9800    |
| C(4D)-H(4DA)  | 0.9800    |
| C(4D)-H(4DB)  | 0.9800    |
| C(4D)-H(4DC)  | 0.9800    |
| C(5D)-H(5DA)  | 0.9800    |
| C(5D)-H(5DB)  | 0.9800    |
| C(5D)-H(5DC)  | 0.9800    |
| C(6B)-C(7B)   | 1.515(8)  |
| C(6B)-H(6BA)  | 0.9900    |
| C(6B)-H(6BB)  | 0.9900    |
| C(7B)-C(10B)  | 1.522(10) |
| C(7B)-C(8B)   | 1.532(9)  |
| C(7B)-C(9B)   | 1.535(11) |
| C(8B)-H(8BA)  | 0.9800    |
| C(8B)-H(8BB)  | 0.9800    |
| C(8B)-H(8BC)  | 0.9800    |
| C(9B)-H(9BA)  | 0.9800    |
| C(9B)-H(9BB)  | 0.9800    |
| C(9B)-H(9BC)  | 0.9800    |
| C(10B)-H(10G) | 0.9800    |
| C(10B)-H(10H) | 0.9800    |
| C(10B)-H(10I) | 0.9800    |
| C(12B)-C(13B) | 1.379(9)  |
| C(12B)-C(11B) | 1.538(10) |
| C(13B)-C(14B) | 1.412(9)  |
| C(13B)-H(13B) | 0.9500    |
| C(14B)-C(15D) | 1.474(16) |
| C(14B)-C(15B) | 1.594(12) |
| C(11B)-C(16D) | 1.39(2)   |
| C(11B)-C(17B) | 1.425(12) |
| C(11B)-C(18B) | 1.444(13) |
| C(11B)-C(17D) | 1.68(3)   |
| C(11B)-C(16B) | 1.712(16) |



|               |           |
|---------------|-----------|
| C(11B)-C(18D) | 1.80(2)   |
| C(16B)-H(16G) | 0.9800    |
| C(16B)-H(16H) | 0.9800    |
| C(16B)-H(16I) | 0.9800    |
| C(17B)-H(17G) | 0.9800    |
| C(17B)-H(17H) | 0.9800    |
| C(17B)-H(17I) | 0.9800    |
| C(18B)-H(18G) | 0.9800    |
| C(18B)-H(18H) | 0.9800    |
| C(18B)-H(18I) | 0.9800    |
| C(16D)-H(16J) | 0.9800    |
| C(16D)-H(16K) | 0.9800    |
| C(16D)-H(16L) | 0.9800    |
| C(17D)-H(17J) | 0.9800    |
| C(17D)-H(17K) | 0.9800    |
| C(17D)-H(17L) | 0.9800    |
| C(18D)-H(18J) | 0.9800    |
| C(18D)-H(18K) | 0.9800    |
| C(18D)-H(18L) | 0.9800    |
| C(15B)-C(19B) | 1.523(16) |
| C(15B)-C(20B) | 1.534(18) |
| C(15B)-C(21B) | 1.541(16) |
| C(19B)-H(19D) | 0.9800    |
| C(19B)-H(19E) | 0.9800    |
| C(19B)-H(19F) | 0.9800    |
| C(20B)-H(20D) | 0.9800    |
| C(20B)-H(20E) | 0.9800    |
| C(20B)-H(20F) | 0.9800    |
| C(21B)-H(21D) | 0.9800    |
| C(21B)-H(21E) | 0.9800    |
| C(21B)-H(21F) | 0.9800    |
| C(15D)-C(21D) | 1.50(2)   |
| C(15D)-C(20D) | 1.53(3)   |
| C(15D)-C(19D) | 1.55(2)   |
| C(19D)-H(19G) | 0.9800    |
| C(19D)-H(19H) | 0.9800    |

|               |           |
|---------------|-----------|
| C(19D)-H(19I) | 0.9800    |
| C(20D)-H(20G) | 0.9800    |
| C(20D)-H(20H) | 0.9800    |
| C(20D)-H(20I) | 0.9800    |
| C(21D)-H(21G) | 0.9800    |
| C(21D)-H(21H) | 0.9800    |
| C(21D)-H(21I) | 0.9800    |
| C(23B)-C(26D) | 1.37(2)   |
| C(23B)-C(25B) | 1.45(2)   |
| C(23B)-C(22B) | 1.487(16) |
| C(23B)-C(22D) | 1.518(16) |
| C(23B)-C(24D) | 1.57(2)   |
| C(23B)-C(24B) | 1.600(17) |
| C(23B)-C(26B) | 1.60(2)   |
| C(23B)-C(25D) | 1.645(19) |
| C(22B)-H(22E) | 0.9900    |
| C(22B)-H(22H) | 0.9900    |
| C(24B)-H(24G) | 0.9800    |
| C(24B)-H(24H) | 0.9800    |
| C(24B)-H(24I) | 0.9800    |
| C(25B)-H(25G) | 0.9800    |
| C(25B)-H(25H) | 0.9800    |
| C(25B)-H(25I) | 0.9800    |
| C(26B)-H(26G) | 0.9800    |
| C(26B)-H(26H) | 0.9800    |
| C(26B)-H(26I) | 0.9800    |
| C(22D)-H(22F) | 0.9900    |
| C(22D)-H(22G) | 0.9900    |
| C(24D)-H(24J) | 0.9800    |
| C(24D)-H(24K) | 0.9800    |
| C(24D)-H(24L) | 0.9800    |
| C(25D)-H(25J) | 0.9800    |
| C(25D)-H(25K) | 0.9800    |
| C(25D)-H(25L) | 0.9800    |
| C(26D)-H(26J) | 0.9800    |
| C(26D)-H(26K) | 0.9800    |

|                    |            |
|--------------------|------------|
| C(26D)-H(26L)      | 0.9800     |
| O(1A)-W(1A)-O(2A)  | 101.2(2)   |
| O(1A)-W(1A)-O(5A)  | 98.3(3)    |
| O(2A)-W(1A)-O(5A)  | 92.7(2)    |
| O(1A)-W(1A)-O(3A)  | 97.4(3)    |
| O(2A)-W(1A)-O(3A)  | 93.1(2)    |
| O(5A)-W(1A)-O(3A)  | 161.8(3)   |
| O(1A)-W(1A)-O(4A)  | 94.2(2)    |
| O(2A)-W(1A)-O(4A)  | 164.58(18) |
| O(5A)-W(1A)-O(4A)  | 84.6(2)    |
| O(3A)-W(1A)-O(4A)  | 85.1(2)    |
| O(1A)-W(1A)-O(6A)  | 174.5(2)   |
| O(2A)-W(1A)-O(6A)  | 84.24(18)  |
| O(5A)-W(1A)-O(6A)  | 82.0(2)    |
| O(3A)-W(1A)-O(6A)  | 81.5(2)    |
| O(4A)-W(1A)-O(6A)  | 80.35(16)  |
| C(1A)-O(2A)-W(1A)  | 141.1(5)   |
| C(1C)-O(2A)-W(1A)  | 123.3(8)   |
| C(6A)-O(3A)-W(1A)  | 135.1(5)   |
| C(6C)-O(3A)-W(1A)  | 142.5(11)  |
| C(12A)-O(4A)-W(1A) | 136.0(4)   |
| C(22C)-O(5A)-W(1A) | 148(3)     |
| C(22A)-O(5A)-W(1A) | 141.2(6)   |
| C(14A)-O(6A)-W(1A) | 131.3(4)   |
| C(4C)-C(2A)-C(1C)  | 114.0(13)  |
| C(4C)-C(2A)-C(3C)  | 109.5(14)  |
| C(1C)-C(2A)-C(3C)  | 113.7(13)  |
| C(3A)-C(2A)-C(1A)  | 111.6(7)   |
| C(3A)-C(2A)-C(4A)  | 111.5(8)   |
| C(1A)-C(2A)-C(4A)  | 106.9(7)   |
| C(3A)-C(2A)-C(5A)  | 111.1(8)   |
| C(1A)-C(2A)-C(5A)  | 106.4(7)   |
| C(4A)-C(2A)-C(5A)  | 109.2(8)   |
| C(4C)-C(2A)-C(5C)  | 106.4(13)  |
| C(1C)-C(2A)-C(5C)  | 107.6(12)  |

|                     |           |
|---------------------|-----------|
| C(3C)-C(2A)-C(5C)   | 104.8(13) |
| O(2A)-C(1A)-C(2A)   | 112.5(6)  |
| O(2A)-C(1A)-H(1AA)  | 109.1     |
| C(2A)-C(1A)-H(1AA)  | 109.1     |
| O(2A)-C(1A)-H(1AB)  | 109.1     |
| C(2A)-C(1A)-H(1AB)  | 109.1     |
| H(1AA)-C(1A)-H(1AB) | 107.8     |
| C(2A)-C(3A)-H(3AA)  | 109.5     |
| C(2A)-C(3A)-H(3AB)  | 109.5     |
| H(3AA)-C(3A)-H(3AB) | 109.5     |
| C(2A)-C(3A)-H(3AC)  | 109.5     |
| H(3AA)-C(3A)-H(3AC) | 109.5     |
| H(3AB)-C(3A)-H(3AC) | 109.5     |
| C(2A)-C(4A)-H(4AA)  | 109.5     |
| C(2A)-C(4A)-H(4AB)  | 109.5     |
| H(4AA)-C(4A)-H(4AB) | 109.5     |
| C(2A)-C(4A)-H(4AC)  | 109.5     |
| H(4AA)-C(4A)-H(4AC) | 109.5     |
| H(4AB)-C(4A)-H(4AC) | 109.5     |
| C(2A)-C(5A)-H(5AA)  | 109.5     |
| C(2A)-C(5A)-H(5AB)  | 109.5     |
| H(5AA)-C(5A)-H(5AB) | 109.5     |
| C(2A)-C(5A)-H(5AC)  | 109.5     |
| H(5AA)-C(5A)-H(5AC) | 109.5     |
| H(5AB)-C(5A)-H(5AC) | 109.5     |
| C(2A)-C(1C)-O(2A)   | 108.7(13) |
| C(2A)-C(1C)-H(1CA)  | 110.0     |
| O(2A)-C(1C)-H(1CA)  | 110.0     |
| C(2A)-C(1C)-H(1CB)  | 110.0     |
| O(2A)-C(1C)-H(1CB)  | 110.0     |
| H(1CA)-C(1C)-H(1CB) | 108.3     |
| C(2A)-C(3C)-H(3CA)  | 109.5     |
| C(2A)-C(3C)-H(3CB)  | 109.5     |
| H(3CA)-C(3C)-H(3CB) | 109.5     |
| C(2A)-C(3C)-H(3CC)  | 109.5     |
| H(3CA)-C(3C)-H(3CC) | 109.5     |

|                     |           |
|---------------------|-----------|
| H(3CB)-C(3C)-H(3CC) | 109.5     |
| C(2A)-C(4C)-H(4CA)  | 109.5     |
| C(2A)-C(4C)-H(4CB)  | 109.5     |
| H(4CA)-C(4C)-H(4CB) | 109.5     |
| C(2A)-C(4C)-H(4CC)  | 109.5     |
| H(4CA)-C(4C)-H(4CC) | 109.5     |
| H(4CB)-C(4C)-H(4CC) | 109.5     |
| C(2A)-C(5C)-H(5CA)  | 109.5     |
| C(2A)-C(5C)-H(5CB)  | 109.5     |
| H(5CA)-C(5C)-H(5CB) | 109.5     |
| C(2A)-C(5C)-H(5CC)  | 109.5     |
| H(5CA)-C(5C)-H(5CC) | 109.5     |
| H(5CB)-C(5C)-H(5CC) | 109.5     |
| C(10C)-C(7A)-C(6C)  | 131(2)    |
| C(10C)-C(7A)-C(8C)  | 116(2)    |
| C(6C)-C(7A)-C(8C)   | 108.0(19) |
| C(9A)-C(7A)-C(8A)   | 111.7(8)  |
| C(9A)-C(7A)-C(10A)  | 112.7(8)  |
| C(8A)-C(7A)-C(10A)  | 107.0(7)  |
| C(9A)-C(7A)-C(6A)   | 114.5(8)  |
| C(8A)-C(7A)-C(6A)   | 105.5(6)  |
| C(10A)-C(7A)-C(6A)  | 104.8(6)  |
| C(10C)-C(7A)-C(9C)  | 98(2)     |
| C(6C)-C(7A)-C(9C)   | 96.7(16)  |
| C(8C)-C(7A)-C(9C)   | 95.2(18)  |
| O(3A)-C(6A)-C(7A)   | 108.3(6)  |
| O(3A)-C(6A)-H(6AA)  | 110.0     |
| C(7A)-C(6A)-H(6AA)  | 110.0     |
| O(3A)-C(6A)-H(6AB)  | 110.0     |
| C(7A)-C(6A)-H(6AB)  | 110.0     |
| H(6AA)-C(6A)-H(6AB) | 108.4     |
| C(7A)-C(8A)-H(8AA)  | 109.5     |
| C(7A)-C(8A)-H(8AB)  | 109.5     |
| H(8AA)-C(8A)-H(8AB) | 109.5     |
| C(7A)-C(8A)-H(8AC)  | 109.5     |
| H(8AA)-C(8A)-H(8AC) | 109.5     |

|                      |           |
|----------------------|-----------|
| H(8AB)-C(8A)-H(8AC)  | 109.5     |
| C(7A)-C(9A)-H(9AA)   | 109.5     |
| C(7A)-C(9A)-H(9AB)   | 109.5     |
| H(9AA)-C(9A)-H(9AB)  | 109.5     |
| C(7A)-C(9A)-H(9AC)   | 109.5     |
| H(9AA)-C(9A)-H(9AC)  | 109.5     |
| H(9AB)-C(9A)-H(9AC)  | 109.5     |
| C(7A)-C(10A)-H(10A)  | 109.5     |
| C(7A)-C(10A)-H(10B)  | 109.5     |
| H(10A)-C(10A)-H(10B) | 109.5     |
| C(7A)-C(10A)-H(10C)  | 109.5     |
| H(10A)-C(10A)-H(10C) | 109.5     |
| H(10B)-C(10A)-H(10C) | 109.5     |
| C(7A)-C(6C)-O(3A)    | 112.7(19) |
| C(7A)-C(6C)-H(6CA)   | 109.1     |
| O(3A)-C(6C)-H(6CA)   | 109.1     |
| C(7A)-C(6C)-H(6CB)   | 109.1     |
| O(3A)-C(6C)-H(6CB)   | 109.1     |
| H(6CA)-C(6C)-H(6CB)  | 107.8     |
| C(7A)-C(8C)-H(8CA)   | 109.5     |
| C(7A)-C(8C)-H(8CB)   | 109.5     |
| H(8CA)-C(8C)-H(8CB)  | 109.5     |
| C(7A)-C(8C)-H(8CC)   | 109.5     |
| H(8CA)-C(8C)-H(8CC)  | 109.5     |
| H(8CB)-C(8C)-H(8CC)  | 109.5     |
| C(7A)-C(9C)-H(9CA)   | 109.5     |
| C(7A)-C(9C)-H(9CB)   | 109.5     |
| H(9CA)-C(9C)-H(9CB)  | 109.5     |
| C(7A)-C(9C)-H(9CC)   | 109.5     |
| H(9CA)-C(9C)-H(9CC)  | 109.5     |
| H(9CB)-C(9C)-H(9CC)  | 109.5     |
| C(7A)-C(10C)-H(10D)  | 109.5     |
| C(7A)-C(10C)-H(10E)  | 109.5     |
| H(10D)-C(10C)-H(10E) | 109.5     |
| C(7A)-C(10C)-H(10F)  | 109.5     |
| H(10D)-C(10C)-H(10F) | 109.5     |

H(10E)-C(10C)-H(10F) 109.5  
C(16A)-C(11A)-C(12A) 114.9(8)  
C(18C)-C(11A)-C(12A) 120.2(8)  
C(18C)-C(11A)-C(17C) 108.1(10)  
C(12A)-C(11A)-C(17C) 109.4(9)  
C(16A)-C(11A)-C(17A) 125.4(11)  
C(12A)-C(11A)-C(17A) 99.1(9)  
C(18C)-C(11A)-C(16C) 108.2(9)  
C(12A)-C(11A)-C(16C) 107.2(8)  
C(17C)-C(11A)-C(16C) 102.3(11)  
C(16A)-C(11A)-C(18A) 114.6(10)  
C(12A)-C(11A)-C(18A) 101.0(9)  
C(17A)-C(11A)-C(18A) 98.0(11)  
O(4A)-C(12A)-C(13A) 124.1(6)  
O(4A)-C(12A)-C(11A) 112.8(6)  
C(13A)-C(12A)-C(11A) 123.1(6)  
C(12A)-C(13A)-C(14A) 124.8(5)  
C(12A)-C(13A)-H(13A) 117.6  
C(14A)-C(13A)-H(13A) 117.6  
O(6A)-C(14A)-C(13A) 123.3(5)  
O(6A)-C(14A)-C(15A) 117.9(6)  
C(13A)-C(14A)-C(15A) 118.8(6)  
C(14A)-C(15A)-C(19A) 110.1(6)  
C(14A)-C(15A)-C(21A) 110.5(6)  
C(19A)-C(15A)-C(21A) 109.2(6)  
C(14A)-C(15A)-C(20A) 108.1(6)  
C(19A)-C(15A)-C(20A) 110.8(7)  
C(21A)-C(15A)-C(20A) 108.0(6)  
C(11A)-C(16A)-H(16A) 109.5  
C(11A)-C(16A)-H(16B) 109.5  
H(16A)-C(16A)-H(16B) 109.5  
C(11A)-C(16A)-H(16C) 109.5  
H(16A)-C(16A)-H(16C) 109.5  
H(16B)-C(16A)-H(16C) 109.5  
C(11A)-C(17A)-H(17A) 109.5  
C(11A)-C(17A)-H(17B) 109.5

H(17A)-C(17A)-H(17B) 109.5  
C(11A)-C(17A)-H(17C) 109.5  
H(17A)-C(17A)-H(17C) 109.5  
H(17B)-C(17A)-H(17C) 109.5  
C(11A)-C(18A)-H(18A) 109.5  
C(11A)-C(18A)-H(18B) 109.5  
H(18A)-C(18A)-H(18B) 109.5  
C(11A)-C(18A)-H(18C) 109.5  
H(18A)-C(18A)-H(18C) 109.5  
H(18B)-C(18A)-H(18C) 109.5  
C(11A)-C(16C)-H(16D) 109.5  
C(11A)-C(16C)-H(16E) 109.5  
H(16D)-C(16C)-H(16E) 109.5  
C(11A)-C(16C)-H(16F) 109.5  
H(16D)-C(16C)-H(16F) 109.5  
H(16E)-C(16C)-H(16F) 109.5  
C(11A)-C(17C)-H(17D) 109.5  
C(11A)-C(17C)-H(17E) 109.5  
H(17D)-C(17C)-H(17E) 109.5  
C(11A)-C(17C)-H(17F) 109.5  
H(17D)-C(17C)-H(17F) 109.5  
H(17E)-C(17C)-H(17F) 109.5  
C(11A)-C(18C)-H(18D) 109.5  
C(11A)-C(18C)-H(18E) 109.5  
H(18D)-C(18C)-H(18E) 109.5  
C(11A)-C(18C)-H(18F) 109.5  
H(18D)-C(18C)-H(18F) 109.5  
H(18E)-C(18C)-H(18F) 109.5  
C(15A)-C(19A)-H(19A) 109.5  
C(15A)-C(19A)-H(19B) 109.5  
H(19A)-C(19A)-H(19B) 109.5  
C(15A)-C(19A)-H(19C) 109.5  
H(19A)-C(19A)-H(19C) 109.5  
H(19B)-C(19A)-H(19C) 109.5  
C(15A)-C(20A)-H(20A) 109.5  
C(15A)-C(20A)-H(20B) 109.5



H(20A)-C(20A)-H(20B) 109.5  
C(15A)-C(20A)-H(20C) 109.5  
H(20A)-C(20A)-H(20C) 109.5  
H(20B)-C(20A)-H(20C) 109.5  
C(15A)-C(21A)-H(21A) 109.5  
C(15A)-C(21A)-H(21B) 109.5  
H(21A)-C(21A)-H(21B) 109.5  
C(15A)-C(21A)-H(21C) 109.5  
H(21A)-C(21A)-H(21C) 109.5  
H(21B)-C(21A)-H(21C) 109.5  
C(25C)-C(23A)-C(24C) 111(3)  
C(25C)-C(23A)-C(22C) 119(3)  
C(24C)-C(23A)-C(22C) 102(3)  
C(26A)-C(23A)-C(22A) 116.2(10)  
C(26A)-C(23A)-C(24A) 110.3(10)  
C(22A)-C(23A)-C(24A) 109.7(9)  
C(26A)-C(23A)-C(25A) 102.1(10)  
C(22A)-C(23A)-C(25A) 108.2(8)  
C(24A)-C(23A)-C(25A) 109.9(9)  
C(25C)-C(23A)-C(26C) 106(3)  
C(24C)-C(23A)-C(26C) 112(3)  
C(22C)-C(23A)-C(26C) 106(3)  
O(5A)-C(22A)-C(23A) 112.6(8)  
O(5A)-C(22A)-H(22A) 109.1  
C(23A)-C(22A)-H(22A) 109.1  
O(5A)-C(22A)-H(22B) 109.1  
C(23A)-C(22A)-H(22B) 109.1  
H(22A)-C(22A)-H(22B) 107.8  
C(23A)-C(24A)-H(24A) 109.5  
C(23A)-C(24A)-H(24B) 109.5  
H(24A)-C(24A)-H(24B) 109.5  
C(23A)-C(24A)-H(24C) 109.5  
H(24A)-C(24A)-H(24C) 109.5  
H(24B)-C(24A)-H(24C) 109.5  
C(23A)-C(25A)-H(25A) 109.5  
C(23A)-C(25A)-H(25B) 109.5

|                      |           |
|----------------------|-----------|
| H(25A)-C(25A)-H(25B) | 109.5     |
| C(23A)-C(25A)-H(25C) | 109.5     |
| H(25A)-C(25A)-H(25C) | 109.5     |
| H(25B)-C(25A)-H(25C) | 109.5     |
| C(23A)-C(26A)-H(26A) | 109.5     |
| C(23A)-C(26A)-H(26B) | 109.5     |
| H(26A)-C(26A)-H(26B) | 109.5     |
| C(23A)-C(26A)-H(26C) | 109.5     |
| H(26A)-C(26A)-H(26C) | 109.5     |
| H(26B)-C(26A)-H(26C) | 109.5     |
| O(5A)-C(22C)-C(23A)  | 126(4)    |
| O(5A)-C(22C)-H(22C)  | 105.8     |
| C(23A)-C(22C)-H(22C) | 105.8     |
| O(5A)-C(22C)-H(22D)  | 105.8     |
| C(23A)-C(22C)-H(22D) | 105.8     |
| H(22C)-C(22C)-H(22D) | 106.2     |
| C(23A)-C(24C)-H(24D) | 109.5     |
| C(23A)-C(24C)-H(24E) | 109.5     |
| H(24D)-C(24C)-H(24E) | 109.5     |
| C(23A)-C(24C)-H(24F) | 109.5     |
| H(24D)-C(24C)-H(24F) | 109.5     |
| H(24E)-C(24C)-H(24F) | 109.5     |
| C(23A)-C(25C)-H(25D) | 109.5     |
| C(23A)-C(25C)-H(25E) | 109.5     |
| H(25D)-C(25C)-H(25E) | 109.5     |
| C(23A)-C(25C)-H(25F) | 109.5     |
| H(25D)-C(25C)-H(25F) | 109.5     |
| H(25E)-C(25C)-H(25F) | 109.5     |
| C(23A)-C(26C)-H(26D) | 109.5     |
| C(23A)-C(26C)-H(26E) | 109.5     |
| H(26D)-C(26C)-H(26E) | 109.5     |
| C(23A)-C(26C)-H(26F) | 109.5     |
| H(26D)-C(26C)-H(26F) | 109.5     |
| H(26E)-C(26C)-H(26F) | 109.5     |
| O(1B)-W(1B)-O(2B)    | 99.16(19) |
| O(1B)-W(1B)-O(5B)    | 98.8(2)   |

|                    |            |
|--------------------|------------|
| O(2B)-W(1B)-O(5B)  | 93.7(2)    |
| O(1B)-W(1B)-O(3B)  | 99.2(2)    |
| O(2B)-W(1B)-O(3B)  | 93.75(19)  |
| O(5B)-W(1B)-O(3B)  | 159.07(19) |
| O(1B)-W(1B)-O(4B)  | 95.87(19)  |
| O(2B)-W(1B)-O(4B)  | 164.97(18) |
| O(5B)-W(1B)-O(4B)  | 84.28(19)  |
| O(3B)-W(1B)-O(4B)  | 83.44(19)  |
| O(1B)-W(1B)-O(6B)  | 175.71(19) |
| O(2B)-W(1B)-O(6B)  | 84.86(17)  |
| O(5B)-W(1B)-O(6B)  | 79.35(18)  |
| O(3B)-W(1B)-O(6B)  | 81.90(17)  |
| O(4B)-W(1B)-O(6B)  | 80.13(16)  |
| C(1D)-O(2B)-W(1B)  | 120.9(9)   |
| C(1B)-O(2B)-W(1B)  | 141.8(5)   |
| C(6B)-O(3B)-W(1B)  | 136.3(4)   |
| C(12B)-O(4B)-W(1B) | 134.1(4)   |
| C(22B)-O(5B)-W(1B) | 140.0(7)   |
| C(22D)-O(5B)-W(1B) | 135.8(7)   |
| C(14B)-O(6B)-W(1B) | 130.6(4)   |
| C(3D)-C(2B)-C(1D)  | 123.8(15)  |
| C(5B)-C(2B)-C(1B)  | 116.6(8)   |
| C(5B)-C(2B)-C(3B)  | 110.4(8)   |
| C(1B)-C(2B)-C(3B)  | 104.3(8)   |
| C(5B)-C(2B)-C(4B)  | 111.6(9)   |
| C(1B)-C(2B)-C(4B)  | 107.5(7)   |
| C(3B)-C(2B)-C(4B)  | 105.7(9)   |
| C(3D)-C(2B)-C(4D)  | 106.1(14)  |
| C(1D)-C(2B)-C(4D)  | 103.4(13)  |
| C(3D)-C(2B)-C(5D)  | 113.9(13)  |
| C(1D)-C(2B)-C(5D)  | 109.0(13)  |
| C(4D)-C(2B)-C(5D)  | 96.3(12)   |
| O(2B)-C(1B)-C(2B)  | 110.6(7)   |
| O(2B)-C(1B)-H(1BA) | 109.5      |
| C(2B)-C(1B)-H(1BA) | 109.5      |
| O(2B)-C(1B)-H(1BB) | 109.5      |

|                     |           |
|---------------------|-----------|
| C(2B)-C(1B)-H(1BB)  | 109.5     |
| H(1BA)-C(1B)-H(1BB) | 108.1     |
| C(2B)-C(3B)-H(3BA)  | 109.5     |
| C(2B)-C(3B)-H(3BB)  | 109.5     |
| H(3BA)-C(3B)-H(3BB) | 109.5     |
| C(2B)-C(3B)-H(3BC)  | 109.5     |
| H(3BA)-C(3B)-H(3BC) | 109.5     |
| H(3BB)-C(3B)-H(3BC) | 109.5     |
| C(2B)-C(4B)-H(4BA)  | 109.5     |
| C(2B)-C(4B)-H(4BB)  | 109.5     |
| H(4BA)-C(4B)-H(4BB) | 109.5     |
| C(2B)-C(4B)-H(4BC)  | 109.5     |
| H(4BA)-C(4B)-H(4BC) | 109.5     |
| H(4BB)-C(4B)-H(4BC) | 109.5     |
| C(2B)-C(5B)-H(5BA)  | 109.5     |
| C(2B)-C(5B)-H(5BB)  | 109.5     |
| H(5BA)-C(5B)-H(5BB) | 109.5     |
| C(2B)-C(5B)-H(5BC)  | 109.5     |
| H(5BA)-C(5B)-H(5BC) | 109.5     |
| H(5BB)-C(5B)-H(5BC) | 109.5     |
| C(2B)-C(1D)-O(2B)   | 115.6(16) |
| C(2B)-C(1D)-H(1DA)  | 108.4     |
| O(2B)-C(1D)-H(1DA)  | 108.4     |
| C(2B)-C(1D)-H(1DB)  | 108.4     |
| O(2B)-C(1D)-H(1DB)  | 108.4     |
| H(1DA)-C(1D)-H(1DB) | 107.5     |
| C(2B)-C(3D)-H(3DA)  | 109.5     |
| C(2B)-C(3D)-H(3DB)  | 109.5     |
| H(3DA)-C(3D)-H(3DB) | 109.5     |
| C(2B)-C(3D)-H(3DC)  | 109.5     |
| H(3DA)-C(3D)-H(3DC) | 109.5     |
| H(3DB)-C(3D)-H(3DC) | 109.5     |
| C(2B)-C(4D)-H(4DA)  | 109.5     |
| C(2B)-C(4D)-H(4DB)  | 109.5     |
| H(4DA)-C(4D)-H(4DB) | 109.5     |
| C(2B)-C(4D)-H(4DC)  | 109.5     |

|                      |          |
|----------------------|----------|
| H(4DA)-C(4D)-H(4DC)  | 109.5    |
| H(4DB)-C(4D)-H(4DC)  | 109.5    |
| C(2B)-C(5D)-H(5DA)   | 109.5    |
| C(2B)-C(5D)-H(5DB)   | 109.5    |
| H(5DA)-C(5D)-H(5DB)  | 109.5    |
| C(2B)-C(5D)-H(5DC)   | 109.5    |
| H(5DA)-C(5D)-H(5DC)  | 109.5    |
| H(5DB)-C(5D)-H(5DC)  | 109.5    |
| O(3B)-C(6B)-C(7B)    | 111.5(5) |
| O(3B)-C(6B)-H(6BA)   | 109.3    |
| C(7B)-C(6B)-H(6BA)   | 109.3    |
| O(3B)-C(6B)-H(6BB)   | 109.3    |
| C(7B)-C(6B)-H(6BB)   | 109.3    |
| H(6BA)-C(6B)-H(6BB)  | 108.0    |
| C(6B)-C(7B)-C(10B)   | 110.5(6) |
| C(6B)-C(7B)-C(8B)    | 107.8(5) |
| C(10B)-C(7B)-C(8B)   | 110.4(6) |
| C(6B)-C(7B)-C(9B)    | 109.3(6) |
| C(10B)-C(7B)-C(9B)   | 110.0(6) |
| C(8B)-C(7B)-C(9B)    | 108.9(6) |
| C(7B)-C(8B)-H(8BA)   | 109.5    |
| C(7B)-C(8B)-H(8BB)   | 109.5    |
| H(8BA)-C(8B)-H(8BB)  | 109.5    |
| C(7B)-C(8B)-H(8BC)   | 109.5    |
| H(8BA)-C(8B)-H(8BC)  | 109.5    |
| H(8BB)-C(8B)-H(8BC)  | 109.5    |
| C(7B)-C(9B)-H(9BA)   | 109.5    |
| C(7B)-C(9B)-H(9BB)   | 109.5    |
| H(9BA)-C(9B)-H(9BB)  | 109.5    |
| C(7B)-C(9B)-H(9BC)   | 109.5    |
| H(9BA)-C(9B)-H(9BC)  | 109.5    |
| H(9BB)-C(9B)-H(9BC)  | 109.5    |
| C(7B)-C(10B)-H(10G)  | 109.5    |
| C(7B)-C(10B)-H(10H)  | 109.5    |
| H(10G)-C(10B)-H(10H) | 109.5    |
| C(7B)-C(10B)-H(10I)  | 109.5    |

|                      |           |
|----------------------|-----------|
| H(10G)-C(10B)-H(10I) | 109.5     |
| H(10H)-C(10B)-H(10I) | 109.5     |
| O(4B)-C(12B)-C(13B)  | 124.0(6)  |
| O(4B)-C(12B)-C(11B)  | 111.7(6)  |
| C(13B)-C(12B)-C(11B) | 124.0(6)  |
| C(12B)-C(13B)-C(14B) | 124.3(6)  |
| C(12B)-C(13B)-H(13B) | 117.8     |
| C(14B)-C(13B)-H(13B) | 117.8     |
| O(6B)-C(14B)-C(13B)  | 123.2(6)  |
| O(6B)-C(14B)-C(15D)  | 125.7(9)  |
| C(13B)-C(14B)-C(15D) | 110.9(8)  |
| O(6B)-C(14B)-C(15B)  | 113.2(7)  |
| C(13B)-C(14B)-C(15B) | 123.0(6)  |
| C(17B)-C(11B)-C(18B) | 118.4(8)  |
| C(16D)-C(11B)-C(12B) | 107.4(12) |
| C(17B)-C(11B)-C(12B) | 111.6(7)  |
| C(18B)-C(11B)-C(12B) | 117.3(8)  |
| C(16D)-C(11B)-C(17D) | 143.9(16) |
| C(12B)-C(11B)-C(17D) | 106.3(11) |
| C(17B)-C(11B)-C(16B) | 96.0(8)   |
| C(18B)-C(11B)-C(16B) | 105.8(8)  |
| C(12B)-C(11B)-C(16B) | 103.9(7)  |
| C(16D)-C(11B)-C(18D) | 101.2(13) |
| C(12B)-C(11B)-C(18D) | 100.4(9)  |
| C(17D)-C(11B)-C(18D) | 84.9(13)  |
| C(11B)-C(16B)-H(16G) | 109.5     |
| C(11B)-C(16B)-H(16H) | 109.5     |
| H(16G)-C(16B)-H(16H) | 109.5     |
| C(11B)-C(16B)-H(16I) | 109.5     |
| H(16G)-C(16B)-H(16I) | 109.5     |
| H(16H)-C(16B)-H(16I) | 109.5     |
| C(11B)-C(17B)-H(17G) | 109.5     |
| C(11B)-C(17B)-H(17H) | 109.5     |
| H(17G)-C(17B)-H(17H) | 109.5     |
| C(11B)-C(17B)-H(17I) | 109.5     |
| H(17G)-C(17B)-H(17I) | 109.5     |

H(17H)-C(17B)-H(17I) 109.5  
C(11B)-C(18B)-H(18G) 109.5  
C(11B)-C(18B)-H(18H) 109.5  
H(18G)-C(18B)-H(18H) 109.5  
C(11B)-C(18B)-H(18I) 109.5  
H(18G)-C(18B)-H(18I) 109.5  
H(18H)-C(18B)-H(18I) 109.5  
C(11B)-C(16D)-H(16J) 109.5  
C(11B)-C(16D)-H(16K) 109.5  
H(16J)-C(16D)-H(16K) 109.5  
C(11B)-C(16D)-H(16L) 109.5  
H(16J)-C(16D)-H(16L) 109.5  
H(16K)-C(16D)-H(16L) 109.5  
C(11B)-C(17D)-H(17J) 109.5  
C(11B)-C(17D)-H(17K) 109.5  
H(17J)-C(17D)-H(17K) 109.5  
C(11B)-C(17D)-H(17L) 109.5  
H(17J)-C(17D)-H(17L) 109.5  
H(17K)-C(17D)-H(17L) 109.5  
C(11B)-C(18D)-H(18J) 109.5  
C(11B)-C(18D)-H(18K) 109.5  
H(18J)-C(18D)-H(18K) 109.5  
C(11B)-C(18D)-H(18L) 109.5  
H(18J)-C(18D)-H(18L) 109.5  
H(18K)-C(18D)-H(18L) 109.5  
C(19B)-C(15B)-C(20B) 108.8(10)  
C(19B)-C(15B)-C(21B) 110.3(9)  
C(20B)-C(15B)-C(21B) 110.2(10)  
C(19B)-C(15B)-C(14B) 114.1(8)  
C(20B)-C(15B)-C(14B) 107.8(9)  
C(21B)-C(15B)-C(14B) 105.5(9)  
C(15B)-C(19B)-H(19D) 109.5  
C(15B)-C(19B)-H(19E) 109.5  
H(19D)-C(19B)-H(19E) 109.5  
C(15B)-C(19B)-H(19F) 109.5  
H(19D)-C(19B)-H(19F) 109.5

H(19E)-C(19B)-H(19F) 109.5  
C(15B)-C(20B)-H(20D) 109.5  
C(15B)-C(20B)-H(20E) 109.5  
H(20D)-C(20B)-H(20E) 109.5  
C(15B)-C(20B)-H(20F) 109.5  
H(20D)-C(20B)-H(20F) 109.5  
H(20E)-C(20B)-H(20F) 109.5  
C(15B)-C(21B)-H(21D) 109.5  
C(15B)-C(21B)-H(21E) 109.5  
H(21D)-C(21B)-H(21E) 109.5  
C(15B)-C(21B)-H(21F) 109.5  
H(21D)-C(21B)-H(21F) 109.5  
H(21E)-C(21B)-H(21F) 109.5  
C(14B)-C(15D)-C(21D) 117.0(14)  
C(14B)-C(15D)-C(20D) 107.1(13)  
C(21D)-C(15D)-C(20D) 109.5(14)  
C(14B)-C(15D)-C(19D) 104.0(12)  
C(21D)-C(15D)-C(19D) 111.3(14)  
C(20D)-C(15D)-C(19D) 107.5(15)  
C(15D)-C(19D)-H(19G) 109.5  
C(15D)-C(19D)-H(19H) 109.5  
H(19G)-C(19D)-H(19H) 109.5  
C(15D)-C(19D)-H(19I) 109.5  
H(19G)-C(19D)-H(19I) 109.5  
H(19H)-C(19D)-H(19I) 109.5  
C(15D)-C(20D)-H(20G) 109.5  
C(15D)-C(20D)-H(20H) 109.5  
H(20G)-C(20D)-H(20H) 109.5  
C(15D)-C(20D)-H(20I) 109.5  
H(20G)-C(20D)-H(20I) 109.5  
H(20H)-C(20D)-H(20I) 109.5  
C(15D)-C(21D)-H(21G) 109.5  
C(15D)-C(21D)-H(21H) 109.5  
H(21G)-C(21D)-H(21H) 109.5  
C(15D)-C(21D)-H(21I) 109.5  
H(21G)-C(21D)-H(21I) 109.5



|                      |           |
|----------------------|-----------|
| H(21H)-C(21D)-H(21I) | 109.5     |
| C(25B)-C(23B)-C(22B) | 115.2(12) |
| C(26D)-C(23B)-C(22D) | 115.8(13) |
| C(26D)-C(23B)-C(24D) | 117.9(13) |
| C(22D)-C(23B)-C(24D) | 103.9(10) |
| C(25B)-C(23B)-C(24B) | 112.5(11) |
| C(22B)-C(23B)-C(24B) | 109.6(9)  |
| C(25B)-C(23B)-C(26B) | 110.3(12) |
| C(22B)-C(23B)-C(26B) | 106.2(10) |
| C(24B)-C(23B)-C(26B) | 102.1(11) |
| C(26D)-C(23B)-C(25D) | 112.7(13) |
| C(22D)-C(23B)-C(25D) | 103.4(10) |
| C(24D)-C(23B)-C(25D) | 101.3(11) |
| O(5B)-C(22B)-C(23B)  | 117.8(11) |
| O(5B)-C(22B)-H(22E)  | 107.9     |
| C(23B)-C(22B)-H(22E) | 107.9     |
| O(5B)-C(22B)-H(22H)  | 107.9     |
| C(23B)-C(22B)-H(22H) | 107.9     |
| H(22E)-C(22B)-H(22H) | 107.2     |
| C(23B)-C(24B)-H(24G) | 109.5     |
| C(23B)-C(24B)-H(24H) | 109.5     |
| H(24G)-C(24B)-H(24H) | 109.5     |
| C(23B)-C(24B)-H(24I) | 109.5     |
| H(24G)-C(24B)-H(24I) | 109.5     |
| H(24H)-C(24B)-H(24I) | 109.5     |
| C(23B)-C(25B)-H(25G) | 109.5     |
| C(23B)-C(25B)-H(25H) | 109.5     |
| H(25G)-C(25B)-H(25H) | 109.5     |
| C(23B)-C(25B)-H(25I) | 109.5     |
| H(25G)-C(25B)-H(25I) | 109.5     |
| H(25H)-C(25B)-H(25I) | 109.5     |
| C(23B)-C(26B)-H(26G) | 109.5     |
| C(23B)-C(26B)-H(26H) | 109.5     |
| H(26G)-C(26B)-H(26H) | 109.5     |
| C(23B)-C(26B)-H(26I) | 109.5     |
| H(26G)-C(26B)-H(26I) | 109.5     |

H(26H)-C(26B)-H(26I) 109.5  
O(5B)-C(22D)-C(23B) 110.6(11)  
O(5B)-C(22D)-H(22F) 109.5  
C(23B)-C(22D)-H(22F) 109.5  
O(5B)-C(22D)-H(22G) 109.5  
C(23B)-C(22D)-H(22G) 109.5  
H(22F)-C(22D)-H(22G) 108.1  
C(23B)-C(24D)-H(24J) 109.5  
C(23B)-C(24D)-H(24K) 109.5  
H(24J)-C(24D)-H(24K) 109.5  
C(23B)-C(24D)-H(24L) 109.5  
H(24J)-C(24D)-H(24L) 109.5  
H(24K)-C(24D)-H(24L) 109.5  
C(23B)-C(25D)-H(25J) 109.5  
C(23B)-C(25D)-H(25K) 109.5  
H(25J)-C(25D)-H(25K) 109.5  
C(23B)-C(25D)-H(25L) 109.5  
H(25J)-C(25D)-H(25L) 109.5  
H(25K)-C(25D)-H(25L) 109.5  
C(23B)-C(26D)-H(26J) 109.5  
C(23B)-C(26D)-H(26K) 109.5  
H(26J)-C(26D)-H(26K) 109.5  
C(23B)-C(26D)-H(26L) 109.5  
H(26J)-C(26D)-H(26L) 109.5  
H(26K)-C(26D)-H(26L) 109.5

---

Table S10. Atomic coordinates ( $\times 10^4$ ) and equivalent isotropic displacement parameters ( $\text{\AA}^2 \times 10^3$ ) for **11a**.  $U(\text{eq})$  is defined as one third of the trace of the orthogonalized  $U^{ij}$  tensor.

|        | x        | y        | z        | $U(\text{eq})$ |
|--------|----------|----------|----------|----------------|
| W(1A)  | 1540(1)  | 2796(1)  | 6801(1)  | 23(1)          |
| O(1A)  | 1781(2)  | 1836(2)  | 7265(2)  | 32(1)          |
| O(2A)  | 637(2)   | 2985(2)  | 6855(2)  | 36(1)          |
| O(3A)  | 1541(2)  | 4022(2)  | 6257(2)  | 38(1)          |
| O(4A)  | 2090(2)  | 3538(2)  | 7598(1)  | 29(1)          |
| O(5A)  | 2624(2)  | 2821(2)  | 6546(2)  | 35(1)          |
| O(6A)  | 1262(2)  | 2324(2)  | 5833(2)  | 27(1)          |
| C(1A)  | 1811(3)  | 4763(3)  | 6444(2)  | 31(1)          |
| C(2A)  | 2254(3)  | 4931(3)  | 7133(2)  | 32(1)          |
| C(3A)  | 2369(3)  | 4327(3)  | 7667(2)  | 27(1)          |
| C(4A)  | 1658(3)  | 5473(3)  | 5872(2)  | 36(1)          |
| C(5A)  | 2172(4)  | 5261(4)  | 5355(3)  | 75(2)          |
| C(6A)  | 862(3)   | 5382(3)  | 5438(3)  | 44(1)          |
| C(7A)  | 1790(4)  | 6374(3)  | 6141(3)  | 96(3)          |
| C(8A)  | 2834(3)  | 4550(3)  | 8409(2)  | 34(1)          |
| C(9A)  | 2891(4)  | 3751(3)  | 8895(3)  | 69(2)          |
| C(10A) | 3622(3)  | 4816(3)  | 8358(2)  | 41(1)          |
| C(11A) | 2460(3)  | 5322(3)  | 8689(3)  | 44(1)          |
| C(12A) | 2819(3)  | 2734(3)  | 5980(2)  | 33(1)          |
| C(13A) | 2300(3)  | 2477(3)  | 5346(2)  | 28(1)          |
| C(14A) | 1577(3)  | 2286(2)  | 5298(2)  | 23(1)          |
| C(15A) | 3640(3)  | 2877(4)  | 6004(3)  | 49(2)          |
| C(16A) | 4045(4)  | 3234(6)  | 6735(3)  | 111(3)         |
| C(17A) | 3725(3)  | 3523(4)  | 5430(3)  | 58(2)          |
| C(18A) | 3976(3)  | 1988(5)  | 5864(4)  | 68(2)          |
| C(19A) | 1021(3)  | 2002(3)  | 4617(2)  | 27(1)          |
| C(20A) | 702(3)   | 1094(4)  | 4733(3)  | 34(2)          |
| C(21A) | 1335(4)  | 1982(4)  | 3982(3)  | 43(2)          |
| C(22A) | 361(4)   | 2675(4)  | 4489(4)  | 44(2)          |
| C(20C) | 1026(18) | 2688(17) | 4079(16) | 50(8)          |
| C(21C) | 1421(16) | 1192(17) | 4318(14) | 45(7)          |

|        |          |          |          |        |
|--------|----------|----------|----------|--------|
| C(22C) | 360(18)  | 1730(20) | 4709(17) | 61(10) |
| W(2B)  | 3194(1)  | 2242(1)  | 3293(1)  | 27(1)  |
| O(1B)  | 2666(2)  | 3153(2)  | 3363(2)  | 36(1)  |
| O(2B)  | 3221(2)  | 1675(2)  | 4059(2)  | 38(1)  |
| O(3B)  | 3864(2)  | 1195(2)  | 2966(2)  | 34(1)  |
| O(4B)  | 2388(2)  | 1581(2)  | 2654(2)  | 28(1)  |
| O(5B)  | 3348(2)  | 2704(2)  | 2291(2)  | 33(1)  |
| O(6B)  | 4197(2)  | 2762(2)  | 3618(2)  | 37(1)  |
| C(1B)  | 3696(3)  | 596(3)   | 2517(2)  | 36(1)  |
| C(2B)  | 2947(3)  | 477(3)   | 2109(2)  | 36(1)  |
| C(3B)  | 2354(3)  | 955(3)   | 2177(2)  | 29(1)  |
| C(4B)  | 1565(3)  | 842(3)   | 1727(2)  | 33(1)  |
| C(5B)  | 1086(4)  | 491(5)   | 2206(3)  | 76(2)  |
| C(6B)  | 1268(3)  | 1729(3)  | 1439(3)  | 52(2)  |
| C(7B)  | 1528(3)  | 204(3)   | 1112(3)  | 52(2)  |
| C(8B)  | 4312(3)  | -27(3)   | 2426(3)  | 41(1)  |
| C(9B)  | 5066(3)  | 265(4)   | 2865(3)  | 57(2)  |
| C(10B) | 4121(3)  | -949(3)  | 2653(3)  | 57(2)  |
| C(11B) | 4334(4)  | -39(4)   | 1646(3)  | 75(2)  |
| C(12B) | 3893(3)  | 3035(3)  | 2108(2)  | 30(1)  |
| C(13B) | 4587(3)  | 3185(4)  | 2609(3)  | 43(1)  |
| C(14B) | 4703(3)  | 3049(3)  | 3312(3)  | 38(1)  |
| C(15B) | 3768(3)  | 3275(3)  | 1332(3)  | 40(1)  |
| C(16B) | 3719(5)  | 2416(4)  | 935(3)   | 81(2)  |
| C(17B) | 3067(3)  | 3805(4)  | 1128(3)  | 64(2)  |
| C(18B) | 4414(3)  | 3812(4)  | 1189(3)  | 63(2)  |
| C(19B) | 5458(3)  | 3216(4)  | 3837(3)  | 58(2)  |
| C(20B) | 5367(7)  | 3494(8)  | 4500(6)  | 84(4)  |
| C(21B) | 5843(6)  | 4054(6)  | 3484(5)  | 66(3)  |
| C(22B) | 5934(5)  | 2483(6)  | 3838(5)  | 46(2)  |
| C(20D) | 5405(7)  | 3974(7)  | 4303(6)  | 18(3)  |
| C(21D) | 6106(11) | 3023(12) | 3617(10) | 72(6)  |
| C(22D) | 5517(10) | 2330(9)  | 4453(8)  | 53(5)  |
| C(23)  | 3647(8)  | -226(9)  | 5054(7)  | 73(4)  |
| C(24)  | 3997(11) | -397(12) | 4559(10) | 74(5)  |
| C(25)  | 4651(11) | 89(17)   | 4730(10) | 125(7) |

|       |          |         |          |        |
|-------|----------|---------|----------|--------|
| C(26) | 5079(9)  | 532(10) | 5077(9)  | 75(4)  |
| C(27) | 6037(13) | 661(15) | 5271(13) | 119(9) |

---

Table S11. Bond lengths [ $\text{\AA}$ ] and angles [ $^\circ$ ] for **11a**.

---

|               |          |
|---------------|----------|
| W(1A)-O(1A)   | 1.719(3) |
| W(1A)-O(2A)   | 1.721(3) |
| W(1A)-O(6A)   | 1.974(3) |
| W(1A)-O(4A)   | 1.989(3) |
| W(1A)-O(3A)   | 2.147(3) |
| W(1A)-O(5A)   | 2.177(3) |
| O(3A)-C(1A)   | 1.250(5) |
| O(4A)-C(3A)   | 1.300(5) |
| O(5A)-C(12A)  | 1.255(5) |
| O(6A)-C(14A)  | 1.316(5) |
| C(1A)-C(2A)   | 1.419(6) |
| C(1A)-C(4A)   | 1.531(6) |
| C(2A)-C(3A)   | 1.368(6) |
| C(2A)-H(2AA)  | 0.9500   |
| C(3A)-C(8A)   | 1.533(6) |
| C(4A)-C(7A)   | 1.467(7) |
| C(4A)-C(6A)   | 1.513(6) |
| C(4A)-C(5A)   | 1.580(8) |
| C(5A)-H(5AA)  | 0.9800   |
| C(5A)-H(5AB)  | 0.9800   |
| C(5A)-H(5AC)  | 0.9800   |
| C(6A)-H(6AA)  | 0.9800   |
| C(6A)-H(6AB)  | 0.9800   |
| C(6A)-H(6AC)  | 0.9800   |
| C(7A)-H(7AA)  | 0.9800   |
| C(7A)-H(7AB)  | 0.9800   |
| C(7A)-H(7AC)  | 0.9800   |
| C(8A)-C(11A)  | 1.530(7) |
| C(8A)-C(9A)   | 1.531(6) |
| C(8A)-C(10A)  | 1.536(7) |
| C(9A)-H(9AA)  | 0.9800   |
| C(9A)-H(9AB)  | 0.9800   |
| C(9A)-H(9AC)  | 0.9800   |
| C(10A)-H(10A) | 0.9800   |

|               |          |
|---------------|----------|
| C(10A)-H(10B) | 0.9800   |
| C(10A)-H(10C) | 0.9800   |
| C(11A)-H(11A) | 0.9800   |
| C(11A)-H(11B) | 0.9800   |
| C(11A)-H(11C) | 0.9800   |
| C(12A)-C(13A) | 1.424(6) |
| C(12A)-C(15A) | 1.519(7) |
| C(13A)-C(14A) | 1.346(6) |
| C(13A)-H(13A) | 0.9500   |
| C(14A)-C(19A) | 1.532(6) |
| C(15A)-C(17A) | 1.530(7) |
| C(15A)-C(18A) | 1.540(8) |
| C(15A)-C(16A) | 1.542(7) |
| C(16A)-H(16A) | 0.9800   |
| C(16A)-H(16B) | 0.9800   |
| C(16A)-H(16C) | 0.9800   |
| C(17A)-H(17A) | 0.9800   |
| C(17A)-H(17B) | 0.9800   |
| C(17A)-H(17C) | 0.9800   |
| C(18A)-H(18A) | 0.9800   |
| C(18A)-H(18B) | 0.9800   |
| C(18A)-H(18C) | 0.9800   |
| C(19A)-C(22C) | 1.34(3)  |
| C(19A)-C(20C) | 1.48(3)  |
| C(19A)-C(21A) | 1.496(8) |
| C(19A)-C(20A) | 1.540(7) |
| C(19A)-C(22A) | 1.563(8) |
| C(19A)-C(21C) | 1.62(3)  |
| C(20A)-H(20A) | 0.9800   |
| C(20A)-H(20B) | 0.9800   |
| C(20A)-H(20C) | 0.9800   |
| C(21A)-H(21A) | 0.9800   |
| C(21A)-H(21B) | 0.9800   |
| C(21A)-H(21C) | 0.9800   |
| C(22A)-H(22A) | 0.9800   |
| C(22A)-H(22B) | 0.9800   |

|               |          |
|---------------|----------|
| C(22A)-H(22C) | 0.9800   |
| C(20C)-H(20D) | 0.9800   |
| C(20C)-H(20E) | 0.9800   |
| C(20C)-H(20F) | 0.9800   |
| C(21C)-H(21D) | 0.9800   |
| C(21C)-H(21E) | 0.9800   |
| C(21C)-H(21F) | 0.9800   |
| C(22C)-H(22D) | 0.9800   |
| C(22C)-H(22E) | 0.9800   |
| C(22C)-H(22F) | 0.9800   |
| W(2B)-O(1B)   | 1.719(3) |
| W(2B)-O(2B)   | 1.720(3) |
| W(2B)-O(4B)   | 1.968(3) |
| W(2B)-O(6B)   | 1.970(3) |
| W(2B)-O(5B)   | 2.167(3) |
| W(2B)-O(3B)   | 2.205(3) |
| O(3B)-C(1B)   | 1.250(5) |
| O(4B)-C(3B)   | 1.324(5) |
| O(5B)-C(12B)  | 1.252(5) |
| O(6B)-C(14B)  | 1.302(6) |
| C(1B)-C(2B)   | 1.428(7) |
| C(1B)-C(8B)   | 1.524(7) |
| C(2B)-C(3B)   | 1.347(6) |
| C(2B)-H(2BA)  | 0.9500   |
| C(3B)-C(4B)   | 1.515(6) |
| C(4B)-C(6B)   | 1.512(6) |
| C(4B)-C(5B)   | 1.535(7) |
| C(4B)-C(7B)   | 1.536(6) |
| C(5B)-H(5BA)  | 0.9800   |
| C(5B)-H(5BB)  | 0.9800   |
| C(5B)-H(5BC)  | 0.9800   |
| C(6B)-H(6BA)  | 0.9800   |
| C(6B)-H(6BB)  | 0.9800   |
| C(6B)-H(6BC)  | 0.9800   |
| C(7B)-H(7BA)  | 0.9800   |
| C(7B)-H(7BB)  | 0.9800   |



|               |           |
|---------------|-----------|
| C(7B)-H(7BC)  | 0.9800    |
| C(8B)-C(9B)   | 1.512(7)  |
| C(8B)-C(10B)  | 1.537(7)  |
| C(8B)-C(11B)  | 1.538(7)  |
| C(9B)-H(9BA)  | 0.9800    |
| C(9B)-H(9BB)  | 0.9800    |
| C(9B)-H(9BC)  | 0.9800    |
| C(10B)-H(10D) | 0.9800    |
| C(10B)-H(10E) | 0.9800    |
| C(10B)-H(10F) | 0.9800    |
| C(11B)-H(11D) | 0.9800    |
| C(11B)-H(11E) | 0.9800    |
| C(11B)-H(11F) | 0.9800    |
| C(12B)-C(13B) | 1.428(7)  |
| C(12B)-C(15B) | 1.524(6)  |
| C(13B)-C(14B) | 1.355(7)  |
| C(13B)-H(13B) | 0.9500    |
| C(14B)-C(19B) | 1.537(7)  |
| C(15B)-C(17B) | 1.492(7)  |
| C(15B)-C(16B) | 1.511(7)  |
| C(15B)-C(18B) | 1.527(7)  |
| C(16B)-H(16D) | 0.9800    |
| C(16B)-H(16E) | 0.9800    |
| C(16B)-H(16F) | 0.9800    |
| C(17B)-H(17D) | 0.9800    |
| C(17B)-H(17E) | 0.9800    |
| C(17B)-H(17F) | 0.9800    |
| C(18B)-H(18D) | 0.9800    |
| C(18B)-H(18E) | 0.9800    |
| C(18B)-H(18F) | 0.9800    |
| C(19B)-C(21D) | 1.397(19) |
| C(19B)-C(20B) | 1.414(12) |
| C(19B)-C(22B) | 1.419(10) |
| C(19B)-C(20D) | 1.490(11) |
| C(19B)-C(21B) | 1.686(11) |
| C(19B)-C(22D) | 1.793(16) |

|                   |            |
|-------------------|------------|
| C(20B)-H(20G)     | 0.9800     |
| C(20B)-H(20H)     | 0.9800     |
| C(20B)-H(20I)     | 0.9800     |
| C(21B)-H(21G)     | 0.9800     |
| C(21B)-H(21H)     | 0.9800     |
| C(21B)-H(21I)     | 0.9800     |
| C(22B)-H(22G)     | 0.9800     |
| C(22B)-H(22H)     | 0.9800     |
| C(22B)-H(22I)     | 0.9800     |
| C(20D)-H(20J)     | 0.9800     |
| C(20D)-H(20K)     | 0.9800     |
| C(20D)-H(20L)     | 0.9800     |
| C(21D)-H(21J)     | 0.9800     |
| C(21D)-H(21K)     | 0.9800     |
| C(21D)-H(21L)     | 0.9800     |
| C(22D)-H(22J)     | 0.9800     |
| C(22D)-H(22K)     | 0.9800     |
| C(22D)-H(22L)     | 0.9800     |
| C(23)-C(24)       | 1.32(2)    |
| C(23)-H(23A)      | 0.9800     |
| C(23)-H(23B)      | 0.9800     |
| C(23)-H(23C)      | 0.9800     |
| C(24)-C(25)       | 1.39(3)    |
| C(24)-H(24A)      | 0.9900     |
| C(24)-H(24B)      | 0.9900     |
| C(25)-C(26)       | 1.129(18)  |
| C(25)-H(25A)      | 0.9900     |
| C(25)-H(25B)      | 0.9900     |
| C(26)-C(27)       | 1.72(3)    |
| C(26)-H(26A)      | 0.9900     |
| C(26)-H(26B)      | 0.9900     |
| C(27)-H(27A)      | 0.9800     |
| C(27)-H(27B)      | 0.9800     |
| C(27)-H(27C)      | 0.9800     |
| O(1A)-W(1A)-O(2A) | 103.74(15) |

|                     |            |
|---------------------|------------|
| O(1A)-W(1A)-O(6A)   | 99.86(12)  |
| O(2A)-W(1A)-O(6A)   | 95.29(13)  |
| O(1A)-W(1A)-O(4A)   | 92.91(12)  |
| O(2A)-W(1A)-O(4A)   | 99.97(14)  |
| O(6A)-W(1A)-O(4A)   | 157.18(12) |
| O(1A)-W(1A)-O(3A)   | 165.47(14) |
| O(2A)-W(1A)-O(3A)   | 90.22(14)  |
| O(6A)-W(1A)-O(3A)   | 82.57(11)  |
| O(4A)-W(1A)-O(3A)   | 80.51(11)  |
| O(1A)-W(1A)-O(5A)   | 90.19(14)  |
| O(2A)-W(1A)-O(5A)   | 165.88(14) |
| O(6A)-W(1A)-O(5A)   | 79.81(12)  |
| O(4A)-W(1A)-O(5A)   | 81.33(12)  |
| O(3A)-W(1A)-O(5A)   | 76.07(13)  |
| C(1A)-O(3A)-W(1A)   | 133.3(3)   |
| C(3A)-O(4A)-W(1A)   | 135.8(3)   |
| C(12A)-O(5A)-W(1A)  | 132.8(3)   |
| C(14A)-O(6A)-W(1A)  | 135.9(3)   |
| O(3A)-C(1A)-C(2A)   | 122.4(4)   |
| O(3A)-C(1A)-C(4A)   | 115.7(4)   |
| C(2A)-C(1A)-C(4A)   | 121.9(4)   |
| C(3A)-C(2A)-C(1A)   | 123.4(4)   |
| C(3A)-C(2A)-H(2AA)  | 118.3      |
| C(1A)-C(2A)-H(2AA)  | 118.3      |
| O(4A)-C(3A)-C(2A)   | 123.9(4)   |
| O(4A)-C(3A)-C(8A)   | 114.7(4)   |
| C(2A)-C(3A)-C(8A)   | 121.4(4)   |
| C(7A)-C(4A)-C(6A)   | 109.8(5)   |
| C(7A)-C(4A)-C(1A)   | 114.3(4)   |
| C(6A)-C(4A)-C(1A)   | 108.9(4)   |
| C(7A)-C(4A)-C(5A)   | 110.4(5)   |
| C(6A)-C(4A)-C(5A)   | 106.0(5)   |
| C(1A)-C(4A)-C(5A)   | 107.0(4)   |
| C(4A)-C(5A)-H(5AA)  | 109.5      |
| C(4A)-C(5A)-H(5AB)  | 109.5      |
| H(5AA)-C(5A)-H(5AB) | 109.5      |

|                      |          |
|----------------------|----------|
| C(4A)-C(5A)-H(5AC)   | 109.5    |
| H(5AA)-C(5A)-H(5AC)  | 109.5    |
| H(5AB)-C(5A)-H(5AC)  | 109.5    |
| C(4A)-C(6A)-H(6AA)   | 109.5    |
| C(4A)-C(6A)-H(6AB)   | 109.5    |
| H(6AA)-C(6A)-H(6AB)  | 109.5    |
| C(4A)-C(6A)-H(6AC)   | 109.5    |
| H(6AA)-C(6A)-H(6AC)  | 109.5    |
| H(6AB)-C(6A)-H(6AC)  | 109.5    |
| C(4A)-C(7A)-H(7AA)   | 109.5    |
| C(4A)-C(7A)-H(7AB)   | 109.5    |
| H(7AA)-C(7A)-H(7AB)  | 109.5    |
| C(4A)-C(7A)-H(7AC)   | 109.5    |
| H(7AA)-C(7A)-H(7AC)  | 109.5    |
| H(7AB)-C(7A)-H(7AC)  | 109.5    |
| C(11A)-C(8A)-C(9A)   | 110.8(4) |
| C(11A)-C(8A)-C(3A)   | 108.2(4) |
| C(9A)-C(8A)-C(3A)    | 110.5(4) |
| C(11A)-C(8A)-C(10A)  | 109.8(4) |
| C(9A)-C(8A)-C(10A)   | 109.1(4) |
| C(3A)-C(8A)-C(10A)   | 108.4(4) |
| C(8A)-C(9A)-H(9AA)   | 109.5    |
| C(8A)-C(9A)-H(9AB)   | 109.5    |
| H(9AA)-C(9A)-H(9AB)  | 109.5    |
| C(8A)-C(9A)-H(9AC)   | 109.5    |
| H(9AA)-C(9A)-H(9AC)  | 109.5    |
| H(9AB)-C(9A)-H(9AC)  | 109.5    |
| C(8A)-C(10A)-H(10A)  | 109.5    |
| C(8A)-C(10A)-H(10B)  | 109.5    |
| H(10A)-C(10A)-H(10B) | 109.5    |
| C(8A)-C(10A)-H(10C)  | 109.5    |
| H(10A)-C(10A)-H(10C) | 109.5    |
| H(10B)-C(10A)-H(10C) | 109.5    |
| C(8A)-C(11A)-H(11A)  | 109.5    |
| C(8A)-C(11A)-H(11B)  | 109.5    |
| H(11A)-C(11A)-H(11B) | 109.5    |

C(8A)-C(11A)-H(11C) 109.5  
H(11A)-C(11A)-H(11C) 109.5  
H(11B)-C(11A)-H(11C) 109.5  
O(5A)-C(12A)-C(13A) 121.5(4)  
O(5A)-C(12A)-C(15A) 117.2(4)  
C(13A)-C(12A)-C(15A) 121.3(4)  
C(14A)-C(13A)-C(12A) 124.3(4)  
C(14A)-C(13A)-H(13A) 117.9  
C(12A)-C(13A)-H(13A) 117.9  
O(6A)-C(14A)-C(13A) 124.0(4)  
O(6A)-C(14A)-C(19A) 111.9(4)  
C(13A)-C(14A)-C(19A) 124.2(4)  
C(12A)-C(15A)-C(17A) 110.5(5)  
C(12A)-C(15A)-C(18A) 108.2(4)  
C(17A)-C(15A)-C(18A) 108.3(5)  
C(12A)-C(15A)-C(16A) 109.4(4)  
C(17A)-C(15A)-C(16A) 109.9(5)  
C(18A)-C(15A)-C(16A) 110.5(6)  
C(15A)-C(16A)-H(16A) 109.5  
C(15A)-C(16A)-H(16B) 109.5  
H(16A)-C(16A)-H(16B) 109.5  
C(15A)-C(16A)-H(16C) 109.5  
H(16A)-C(16A)-H(16C) 109.5  
H(16B)-C(16A)-H(16C) 109.5  
C(15A)-C(17A)-H(17A) 109.5  
C(15A)-C(17A)-H(17B) 109.5  
H(17A)-C(17A)-H(17B) 109.5  
C(15A)-C(17A)-H(17C) 109.5  
H(17A)-C(17A)-H(17C) 109.5  
H(17B)-C(17A)-H(17C) 109.5  
C(15A)-C(18A)-H(18A) 109.5  
C(15A)-C(18A)-H(18B) 109.5  
H(18A)-C(18A)-H(18B) 109.5  
C(15A)-C(18A)-H(18C) 109.5  
H(18A)-C(18A)-H(18C) 109.5  
H(18B)-C(18A)-H(18C) 109.5

C(22C)-C(19A)-C(20C) 118.5(19)  
C(22C)-C(19A)-C(14A) 114.1(14)  
C(20C)-C(19A)-C(14A) 107.5(12)  
C(21A)-C(19A)-C(14A) 114.6(4)  
C(21A)-C(19A)-C(20A) 110.1(4)  
C(14A)-C(19A)-C(20A) 108.9(4)  
C(21A)-C(19A)-C(22A) 109.0(5)  
C(14A)-C(19A)-C(22A) 106.6(4)  
C(20A)-C(19A)-C(22A) 107.4(4)  
C(22C)-C(19A)-C(21C) 108.8(17)  
C(20C)-C(19A)-C(21C) 101.3(15)  
C(14A)-C(19A)-C(21C) 105.2(10)  
C(19A)-C(20A)-H(20A) 109.5  
C(19A)-C(20A)-H(20B) 109.5  
H(20A)-C(20A)-H(20B) 109.5  
C(19A)-C(20A)-H(20C) 109.5  
H(20A)-C(20A)-H(20C) 109.5  
H(20B)-C(20A)-H(20C) 109.5  
C(19A)-C(21A)-H(21A) 109.5  
C(19A)-C(21A)-H(21B) 109.5  
H(21A)-C(21A)-H(21B) 109.5  
C(19A)-C(21A)-H(21C) 109.5  
H(21A)-C(21A)-H(21C) 109.5  
H(21B)-C(21A)-H(21C) 109.5  
C(19A)-C(22A)-H(22A) 109.5  
C(19A)-C(22A)-H(22B) 109.5  
H(22A)-C(22A)-H(22B) 109.5  
C(19A)-C(22A)-H(22C) 109.5  
H(22A)-C(22A)-H(22C) 109.5  
H(22B)-C(22A)-H(22C) 109.5  
C(19A)-C(20C)-H(20D) 109.5  
C(19A)-C(20C)-H(20E) 109.5  
H(20D)-C(20C)-H(20E) 109.5  
C(19A)-C(20C)-H(20F) 109.5  
H(20D)-C(20C)-H(20F) 109.5  
H(20E)-C(20C)-H(20F) 109.5

|                      |            |
|----------------------|------------|
| C(19A)-C(21C)-H(21D) | 109.5      |
| C(19A)-C(21C)-H(21E) | 109.5      |
| H(21D)-C(21C)-H(21E) | 109.5      |
| C(19A)-C(21C)-H(21F) | 109.5      |
| H(21D)-C(21C)-H(21F) | 109.5      |
| H(21E)-C(21C)-H(21F) | 109.5      |
| C(19A)-C(22C)-H(22D) | 109.5      |
| C(19A)-C(22C)-H(22E) | 109.5      |
| H(22D)-C(22C)-H(22E) | 109.5      |
| C(19A)-C(22C)-H(22F) | 109.5      |
| H(22D)-C(22C)-H(22F) | 109.5      |
| H(22E)-C(22C)-H(22F) | 109.5      |
| O(1B)-W(2B)-O(2B)    | 103.23(15) |
| O(1B)-W(2B)-O(4B)    | 96.18(13)  |
| O(2B)-W(2B)-O(4B)    | 98.87(14)  |
| O(1B)-W(2B)-O(6B)    | 98.99(14)  |
| O(2B)-W(2B)-O(6B)    | 95.51(14)  |
| O(4B)-W(2B)-O(6B)    | 156.10(13) |
| O(1B)-W(2B)-O(5B)    | 90.80(13)  |
| O(2B)-W(2B)-O(5B)    | 165.90(14) |
| O(4B)-W(2B)-O(5B)    | 80.62(12)  |
| O(6B)-W(2B)-O(5B)    | 80.81(12)  |
| O(1B)-W(2B)-O(3B)    | 167.09(13) |
| O(2B)-W(2B)-O(3B)    | 89.64(13)  |
| O(4B)-W(2B)-O(3B)    | 80.62(11)  |
| O(6B)-W(2B)-O(3B)    | 80.48(13)  |
| O(5B)-W(2B)-O(3B)    | 76.35(12)  |
| C(1B)-O(3B)-W(2B)    | 132.1(3)   |
| C(3B)-O(4B)-W(2B)    | 135.5(3)   |
| C(12B)-O(5B)-W(2B)   | 133.0(3)   |
| C(14B)-O(6B)-W(2B)   | 135.1(3)   |
| O(3B)-C(1B)-C(2B)    | 121.6(5)   |
| O(3B)-C(1B)-C(8B)    | 118.2(5)   |
| C(2B)-C(1B)-C(8B)    | 120.2(4)   |
| C(3B)-C(2B)-C(1B)    | 125.1(4)   |
| C(3B)-C(2B)-H(2BA)   | 117.4      |

|                     |          |
|---------------------|----------|
| C(1B)-C(2B)-H(2BA)  | 117.4    |
| O(4B)-C(3B)-C(2B)   | 123.9(4) |
| O(4B)-C(3B)-C(4B)   | 111.3(4) |
| C(2B)-C(3B)-C(4B)   | 124.8(4) |
| C(6B)-C(4B)-C(3B)   | 108.9(4) |
| C(6B)-C(4B)-C(5B)   | 109.2(5) |
| C(3B)-C(4B)-C(5B)   | 107.5(4) |
| C(6B)-C(4B)-C(7B)   | 109.2(4) |
| C(3B)-C(4B)-C(7B)   | 112.2(4) |
| C(5B)-C(4B)-C(7B)   | 109.7(4) |
| C(4B)-C(5B)-H(5BA)  | 109.5    |
| C(4B)-C(5B)-H(5BB)  | 109.5    |
| H(5BA)-C(5B)-H(5BB) | 109.5    |
| C(4B)-C(5B)-H(5BC)  | 109.5    |
| H(5BA)-C(5B)-H(5BC) | 109.5    |
| H(5BB)-C(5B)-H(5BC) | 109.5    |
| C(4B)-C(6B)-H(6BA)  | 109.5    |
| C(4B)-C(6B)-H(6BB)  | 109.5    |
| H(6BA)-C(6B)-H(6BB) | 109.5    |
| C(4B)-C(6B)-H(6BC)  | 109.5    |
| H(6BA)-C(6B)-H(6BC) | 109.5    |
| H(6BB)-C(6B)-H(6BC) | 109.5    |
| C(4B)-C(7B)-H(7BA)  | 109.5    |
| C(4B)-C(7B)-H(7BB)  | 109.5    |
| H(7BA)-C(7B)-H(7BB) | 109.5    |
| C(4B)-C(7B)-H(7BC)  | 109.5    |
| H(7BA)-C(7B)-H(7BC) | 109.5    |
| H(7BB)-C(7B)-H(7BC) | 109.5    |
| C(9B)-C(8B)-C(1B)   | 111.0(4) |
| C(9B)-C(8B)-C(10B)  | 110.4(4) |
| C(1B)-C(8B)-C(10B)  | 107.6(5) |
| C(9B)-C(8B)-C(11B)  | 108.8(5) |
| C(1B)-C(8B)-C(11B)  | 109.0(4) |
| C(10B)-C(8B)-C(11B) | 110.0(5) |
| C(8B)-C(9B)-H(9BA)  | 109.5    |
| C(8B)-C(9B)-H(9BB)  | 109.5    |



|                      |          |
|----------------------|----------|
| H(9BA)-C(9B)-H(9BB)  | 109.5    |
| C(8B)-C(9B)-H(9BC)   | 109.5    |
| H(9BA)-C(9B)-H(9BC)  | 109.5    |
| H(9BB)-C(9B)-H(9BC)  | 109.5    |
| C(8B)-C(10B)-H(10D)  | 109.5    |
| C(8B)-C(10B)-H(10E)  | 109.5    |
| H(10D)-C(10B)-H(10E) | 109.5    |
| C(8B)-C(10B)-H(10F)  | 109.5    |
| H(10D)-C(10B)-H(10F) | 109.5    |
| H(10E)-C(10B)-H(10F) | 109.5    |
| C(8B)-C(11B)-H(11D)  | 109.5    |
| C(8B)-C(11B)-H(11E)  | 109.5    |
| H(11D)-C(11B)-H(11E) | 109.5    |
| C(8B)-C(11B)-H(11F)  | 109.5    |
| H(11D)-C(11B)-H(11F) | 109.5    |
| H(11E)-C(11B)-H(11F) | 109.5    |
| O(5B)-C(12B)-C(13B)  | 121.0(4) |
| O(5B)-C(12B)-C(15B)  | 116.5(4) |
| C(13B)-C(12B)-C(15B) | 122.5(4) |
| C(14B)-C(13B)-C(12B) | 124.3(5) |
| C(14B)-C(13B)-H(13B) | 117.8    |
| C(12B)-C(13B)-H(13B) | 117.8    |
| O(6B)-C(14B)-C(13B)  | 124.5(5) |
| O(6B)-C(14B)-C(19B)  | 112.5(5) |
| C(13B)-C(14B)-C(19B) | 123.0(5) |
| C(17B)-C(15B)-C(16B) | 113.0(5) |
| C(17B)-C(15B)-C(12B) | 107.7(4) |
| C(16B)-C(15B)-C(12B) | 106.3(4) |
| C(17B)-C(15B)-C(18B) | 109.1(4) |
| C(16B)-C(15B)-C(18B) | 108.6(5) |
| C(12B)-C(15B)-C(18B) | 112.2(5) |
| C(15B)-C(16B)-H(16D) | 109.5    |
| C(15B)-C(16B)-H(16E) | 109.5    |
| H(16D)-C(16B)-H(16E) | 109.5    |
| C(15B)-C(16B)-H(16F) | 109.5    |
| H(16D)-C(16B)-H(16F) | 109.5    |

H(16E)-C(16B)-H(16F) 109.5  
C(15B)-C(17B)-H(17D) 109.5  
C(15B)-C(17B)-H(17E) 109.5  
H(17D)-C(17B)-H(17E) 109.5  
C(15B)-C(17B)-H(17F) 109.5  
H(17D)-C(17B)-H(17F) 109.5  
H(17E)-C(17B)-H(17F) 109.5  
C(15B)-C(18B)-H(18D) 109.5  
C(15B)-C(18B)-H(18E) 109.5  
H(18D)-C(18B)-H(18E) 109.5  
C(15B)-C(18B)-H(18F) 109.5  
H(18D)-C(18B)-H(18F) 109.5  
H(18E)-C(18B)-H(18F) 109.5  
C(20B)-C(19B)-C(22B) 116.5(8)  
C(21D)-C(19B)-C(20D) 122.8(10)  
C(21D)-C(19B)-C(14B) 117.6(9)  
C(20B)-C(19B)-C(14B) 111.8(6)  
C(22B)-C(19B)-C(14B) 109.3(5)  
C(20D)-C(19B)-C(14B) 110.6(6)  
C(20B)-C(19B)-C(21B) 107.9(7)  
C(22B)-C(19B)-C(21B) 105.8(6)  
C(14B)-C(19B)-C(21B) 104.8(6)  
C(21D)-C(19B)-C(22D) 97.8(10)  
C(20D)-C(19B)-C(22D) 99.9(7)  
C(14B)-C(19B)-C(22D) 102.7(7)  
C(19B)-C(20B)-H(20G) 109.5  
C(19B)-C(20B)-H(20H) 109.5  
H(20G)-C(20B)-H(20H) 109.5  
C(19B)-C(20B)-H(20I) 109.5  
H(20G)-C(20B)-H(20I) 109.5  
H(20H)-C(20B)-H(20I) 109.5  
C(19B)-C(21B)-H(21G) 109.5  
C(19B)-C(21B)-H(21H) 109.5  
H(21G)-C(21B)-H(21H) 109.5  
C(19B)-C(21B)-H(21I) 109.5  
H(21G)-C(21B)-H(21I) 109.5

|                      |           |
|----------------------|-----------|
| H(21H)-C(21B)-H(21I) | 109.5     |
| C(19B)-C(22B)-H(22G) | 109.5     |
| C(19B)-C(22B)-H(22H) | 109.5     |
| H(22G)-C(22B)-H(22H) | 109.5     |
| C(19B)-C(22B)-H(22I) | 109.5     |
| H(22G)-C(22B)-H(22I) | 109.5     |
| H(22H)-C(22B)-H(22I) | 109.5     |
| C(19B)-C(20D)-H(20J) | 109.5     |
| C(19B)-C(20D)-H(20K) | 109.5     |
| H(20J)-C(20D)-H(20K) | 109.5     |
| C(19B)-C(20D)-H(20L) | 109.5     |
| H(20J)-C(20D)-H(20L) | 109.5     |
| H(20K)-C(20D)-H(20L) | 109.5     |
| C(19B)-C(21D)-H(21J) | 109.5     |
| C(19B)-C(21D)-H(21K) | 109.5     |
| H(21J)-C(21D)-H(21K) | 109.5     |
| C(19B)-C(21D)-H(21L) | 109.5     |
| H(21J)-C(21D)-H(21L) | 109.5     |
| H(21K)-C(21D)-H(21L) | 109.5     |
| C(19B)-C(22D)-H(22J) | 109.5     |
| C(19B)-C(22D)-H(22K) | 109.5     |
| H(22J)-C(22D)-H(22K) | 109.5     |
| C(19B)-C(22D)-H(22L) | 109.5     |
| H(22J)-C(22D)-H(22L) | 109.5     |
| H(22K)-C(22D)-H(22L) | 109.5     |
| C(24)-C(23)-H(23A)   | 109.5     |
| C(24)-C(23)-H(23B)   | 109.5     |
| H(23A)-C(23)-H(23B)  | 109.5     |
| C(24)-C(23)-H(23C)   | 109.5     |
| H(23A)-C(23)-H(23C)  | 109.5     |
| H(23B)-C(23)-H(23C)  | 109.5     |
| C(23)-C(24)-C(25)    | 105.9(17) |
| C(23)-C(24)-H(24A)   | 110.6     |
| C(25)-C(24)-H(24A)   | 110.6     |
| C(23)-C(24)-H(24B)   | 110.6     |
| C(25)-C(24)-H(24B)   | 110.6     |

|                     |           |
|---------------------|-----------|
| H(24A)-C(24)-H(24B) | 108.7     |
| C(26)-C(25)-C(24)   | 155(2)    |
| C(26)-C(25)-H(25A)  | 97.8      |
| C(24)-C(25)-H(25A)  | 97.8      |
| C(26)-C(25)-H(25B)  | 97.8      |
| C(24)-C(25)-H(25B)  | 97.8      |
| H(25A)-C(25)-H(25B) | 103.7     |
| C(25)-C(26)-C(27)   | 136.7(19) |
| C(25)-C(26)-H(26A)  | 103.0     |
| C(27)-C(26)-H(26A)  | 103.0     |
| C(25)-C(26)-H(26B)  | 103.0     |
| C(27)-C(26)-H(26B)  | 103.0     |
| H(26A)-C(26)-H(26B) | 105.1     |
| C(26)-C(27)-H(27A)  | 109.5     |
| C(26)-C(27)-H(27B)  | 109.5     |
| H(27A)-C(27)-H(27B) | 109.5     |
| C(26)-C(27)-H(27C)  | 109.5     |
| H(27A)-C(27)-H(27C) | 109.5     |
| H(27B)-C(27)-H(27C) | 109.5     |

---

**Reference:**

- (1) SHELXTL2013; Bruker-AXS: Madison, Wisconsin, 2013.
